# Supplementary material for: Peptidome profiling of human, bovine, and donkey colostrum through label-free quantitative analysis reveals proteolysis of milk proteins
Source: Royal Society of Chemistry journal article supplement (doi:10.1039/d4fo00689e), 2024-01-01
Supplement: d4fo00689e2.pdf [file d4fo00689e2.pdf]

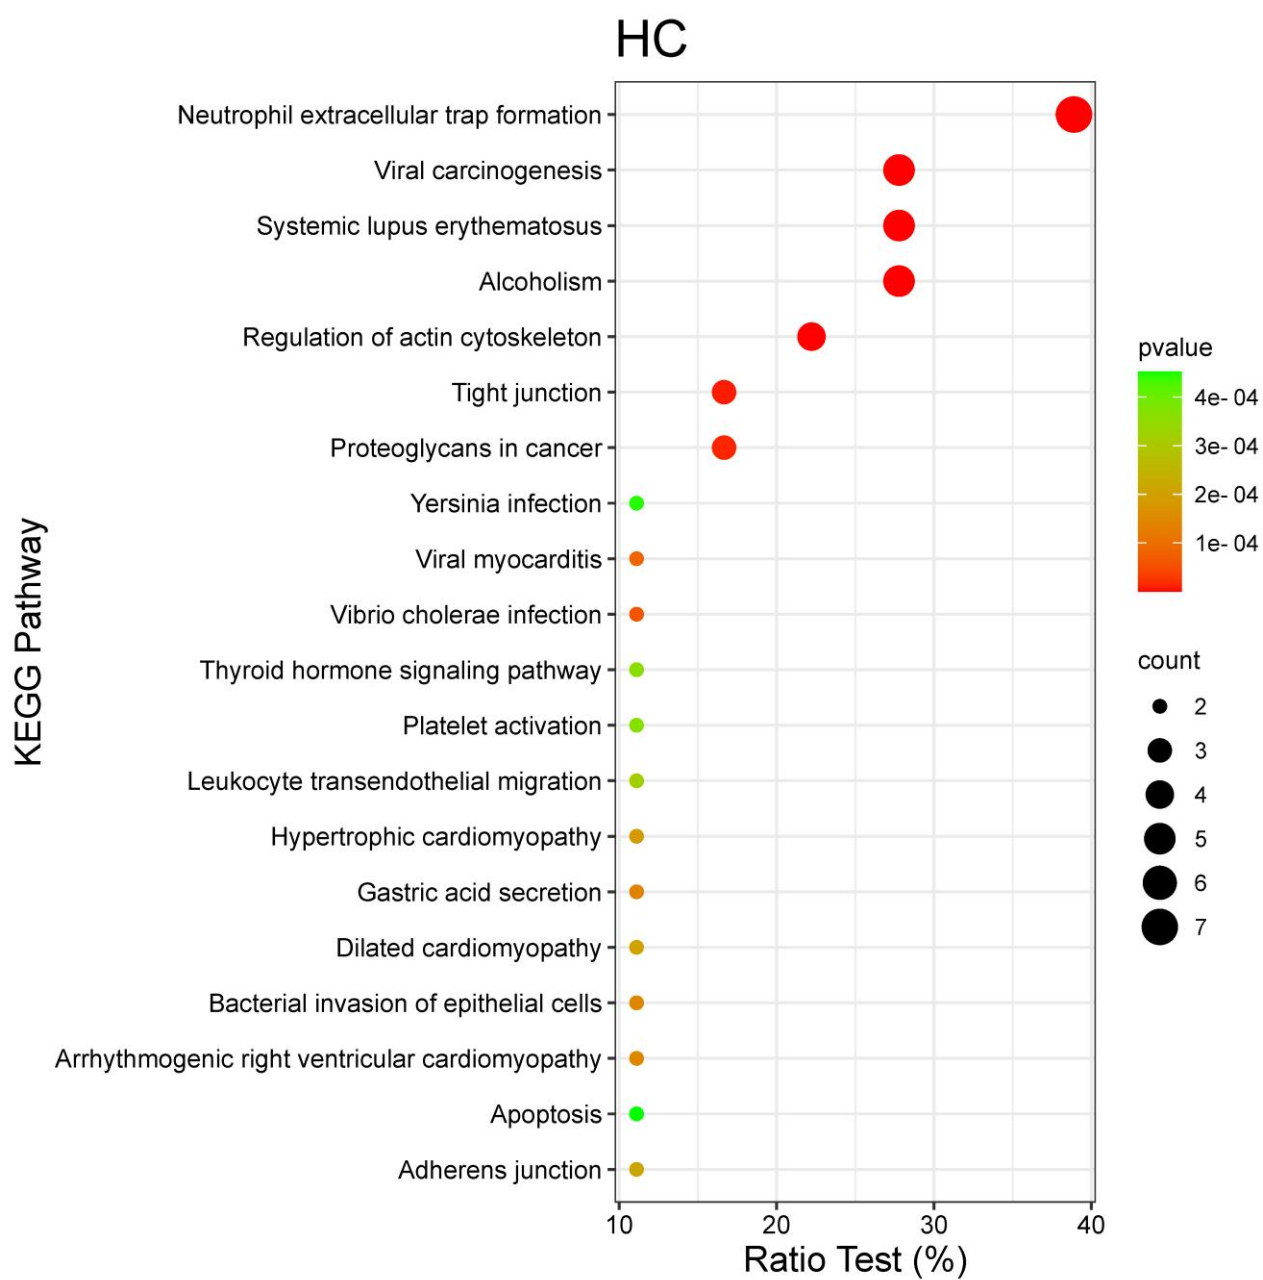

# BC

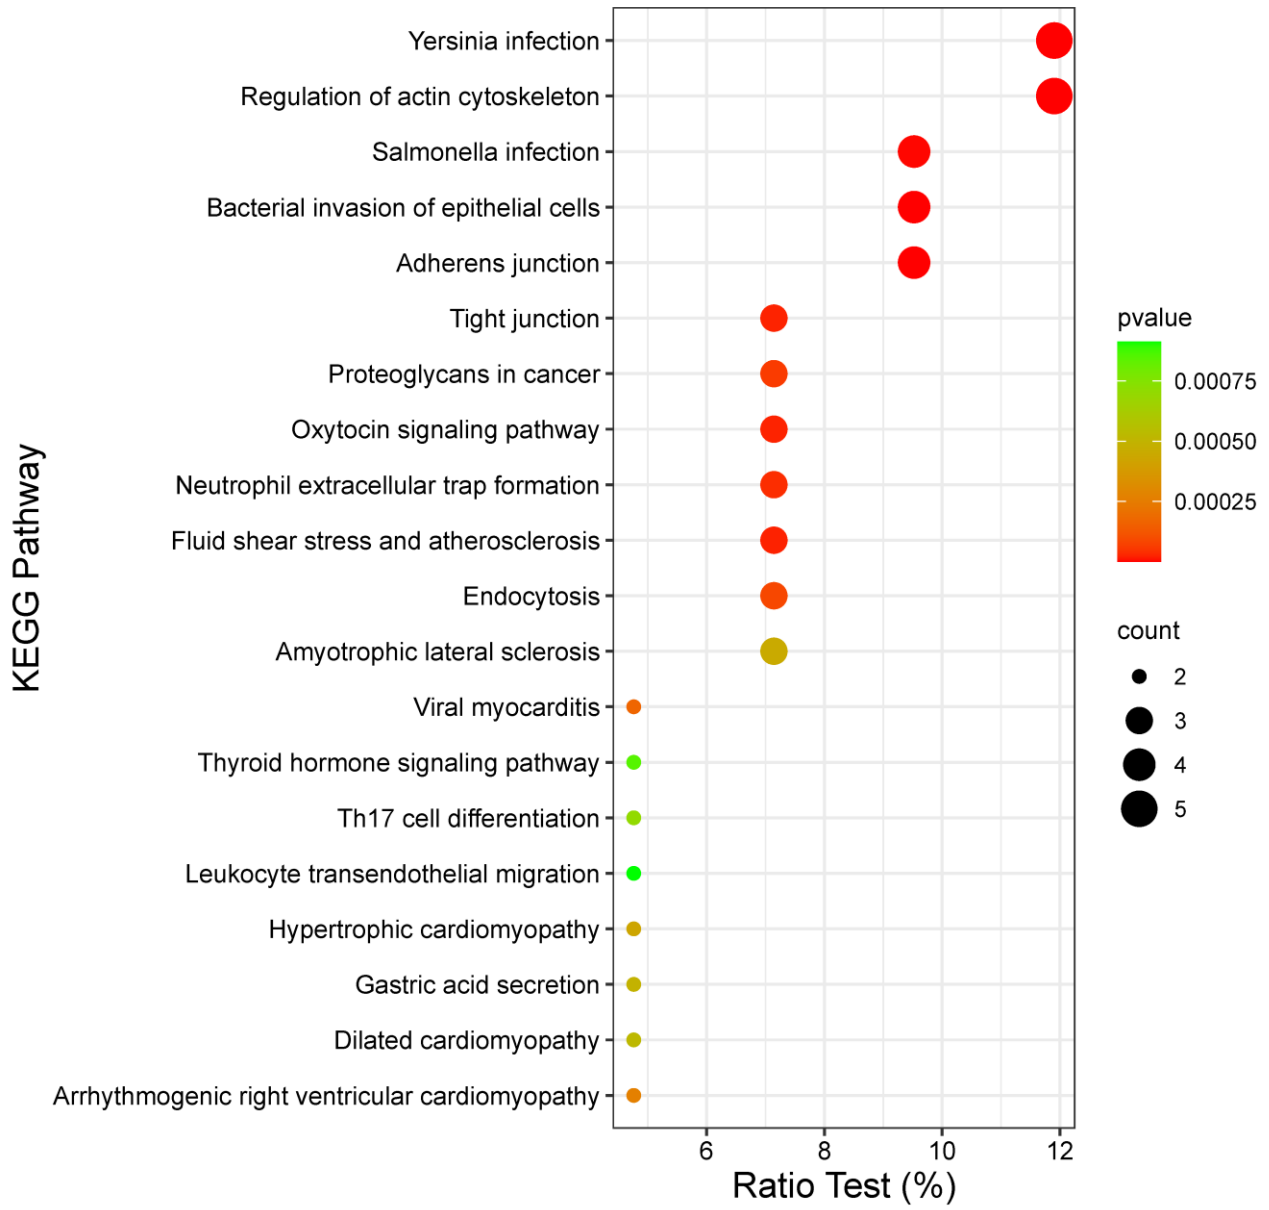

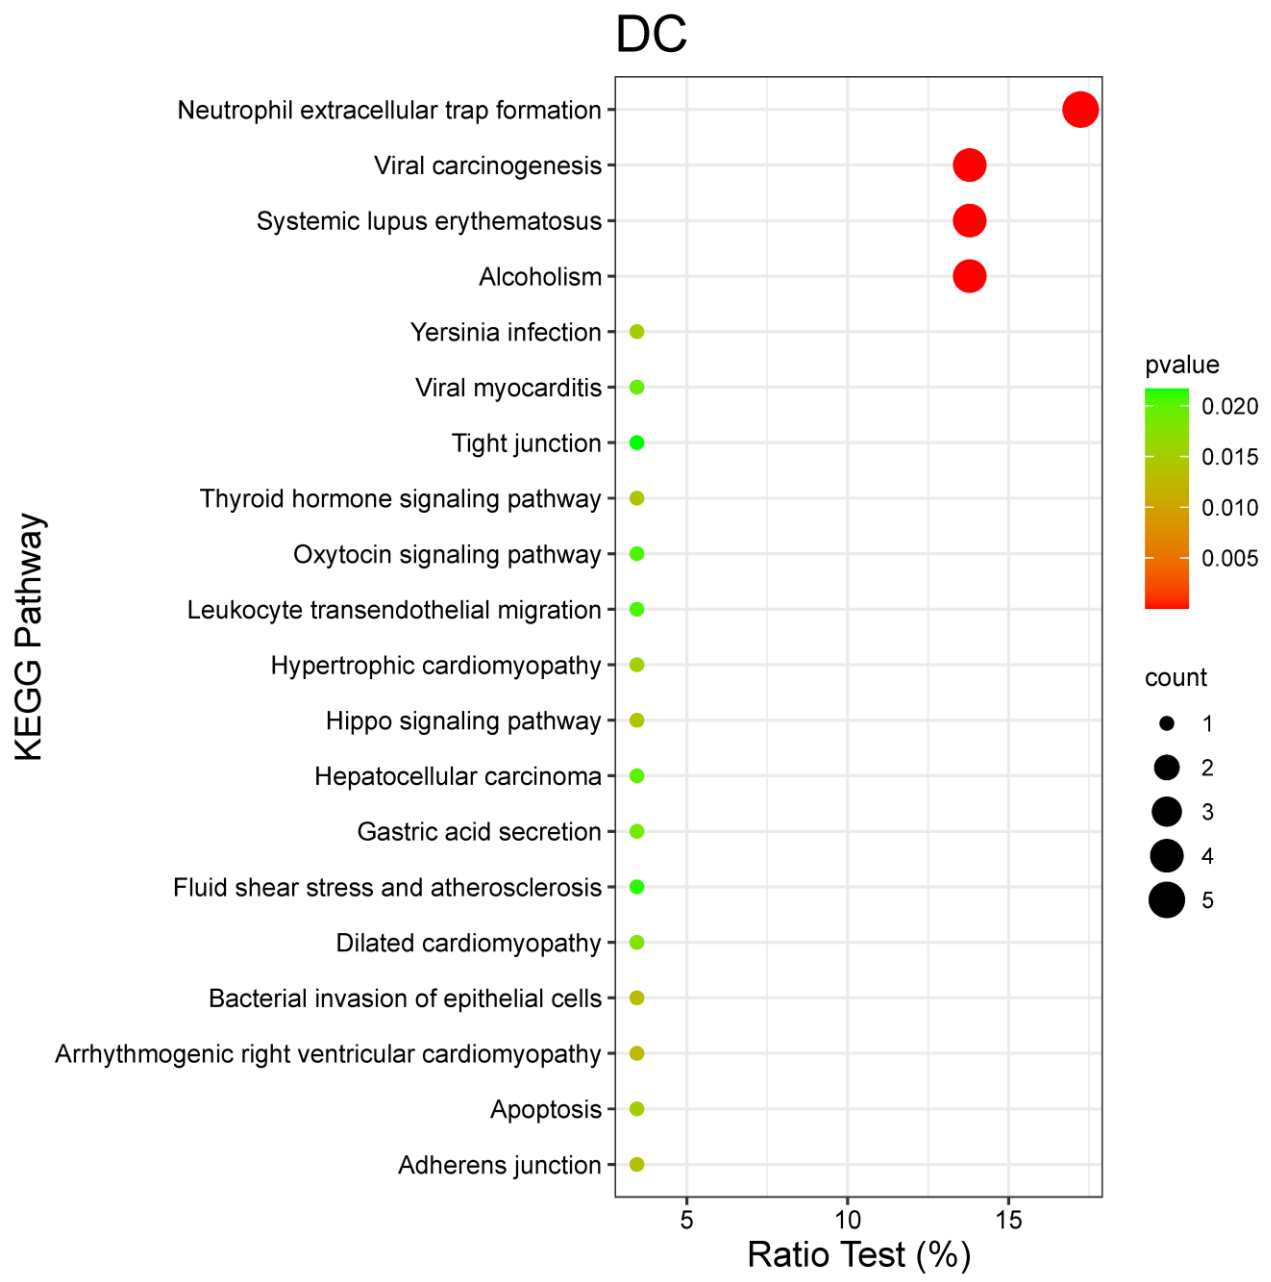

Fig. S2. KEGG pathway analysis of the common parent proteins in HC (A), BC (B), and DC (C). HC, human colostrum; BC, bovine colostrum; DC, donkey colostrum. The first 20 pathways are displayed.
