# Supplementary material for: Peptidome profiling of human, bovine, and donkey colostrum through label-free quantitative analysis reveals proteolysis of milk proteins
Source: Royal Society of Chemistry journal article supplement (doi:10.1039/d4fo00689e), 2024-01-01
Supplement: d4fo00689e3.pdf [file d4fo00689e3.pdf]

Table S1. Top 10 parent proteins of endogenous peptides and bioactive peptides in human, bovine, and donkey colostrum

| Protein names           | Source | The number of endogenous peptides | The number of bioactive peptides |
|-------------------------|--------|-----------------------------------|----------------------------------|
| CSN2                    | HC     | 1562                              | 238                              |
| SPP1                    | HC     | 809                               | 0                                |
| CSN1S1                  | HC     | 532                               | 0                                |
| PIGR                    | HC     | 347                               | 0                                |
| CSN3                    | HC     | 207                               | 7                                |
| CLU                     | HC     | 99                                | 0                                |
| BTN1A1                  | HC     | 56                                | 0                                |
| CEL                     | HC     | 42                                | 0                                |
| B4GALT1                 | HC     | 29                                | 0                                |
| MUC1                    | HC     | 19                                | 0                                |
| CSN2                    | BC     | 1859                              | 876                              |
| CSN1S1                  | BC     | 1321                              | 438                              |
| CSN1S2                  | BC     | 913                               | 143                              |
| PIGR                    | BC     | 332                               | 0                                |
| CSN3                    | BC     | 435                               | 87                               |
| BTN1A1                  | BC     | 154                               | 0                                |
| GLYCAM1                 | BC     | 132                               | 0                                |
| LGB                     | BC     | 126                               | 61                               |
| Serum amyloid A protein | BC     | 365                               | 0                                |
| SPP1                    | BC     | 116                               | 0                                |
| csn2                    | DC     | 669                               | 14                               |
| PLIN2                   | DC     | 471                               | 0                                |
| BTN1A1                  | DC     | 421                               | 0                                |
| PIGR                    | DC     | 311                               | 0                                |
| SPP1                    | DC     | 262                               | 0                                |
| CSN1S2                  | DC     | 350                               | 1                                |
| CSN1S1                  | DC     | 296                               | 0                                |
| Serum amyloid A protein | DC     | 172                               | 0                                |
| SLC34A2                 | DC     | 170                               | 0                                |
| EZR                     | DC     | 115                               | 0                                |
