# Supplementary material for: Peptidome profiling of human, bovine, and donkey colostrum through label-free quantitative analysis reveals proteolysis of milk proteins
Source: Royal Society of Chemistry journal article supplement (doi:10.1039/d4fo00689e), 2024-01-01
Supplement: d4fo00689e4.pdf [file d4fo00689e4.pdf]

Table S2. Bioactive peptides present in human colostrum.

| Parent proteins | Protein description | Peptides                                                                                                             | Function                 |
|-----------------|---------------------|----------------------------------------------------------------------------------------------------------------------|--------------------------|
| P05814          | CSN2                | SPTIPFFDPQIP                                                                                                         | Increase cellular growth |
|                 |                     | NQELLLNPTHQIYPVTQPLAPVHNP                                                                                            | Antimicrobial            |
|                 |                     | GRVMPVLKSPTIPFFDPQIPK, GRVM(+15.99)PVLKSPTIPFFDPQIPK                                                                 | Immunomodulatory         |
|                 |                     | LLNQELLLNPTHQIYPVTQPLAPVHNPISV, LLNQELLLNPTHQIYPVTQPLAPVHNPIS(+79.97)V                                               | Antimicrobial            |
|                 |                     | LLNPTHQIYPVTQPLAPVHNPIS                                                                                              | Antimicrobial            |
|                 |                     | DTVYTKGRV                                                                                                            | ACE-inhibitory           |
|                 |                     | DLENLHLP                                                                                                             | ACE-inhibitory           |
|                 |                     | TQPLAPVHNPIS                                                                                                         | Antimicrobial            |
|                 |                     | ELLLNPTHQIYPVTQPLAPVHNPIS                                                                                            | Antimicrobial            |
|                 |                     | SPTIPFFDPQIPK                                                                                                        | Increase cellular growth |
|                 |                     | QELLLNPTHQIYPVTQPLAPVHNPISV                                                                                          | Antimicrobial            |
|                 |                     | NQELLLNPTHQIYPVTQPLAPVHNPISV, NQELLLNPTHQIYPVTQPLAPVHNPIS(+79.97)V                                                   | Antimicrobial            |
|                 |                     | EPIPYGFLPQN                                                                                                          | ACE-inhibitory           |
|                 |                     | LLLNPTHQIYPVTQPLAPVHNPIS                                                                                             | Antimicrobial            |
|                 |                     | GRVMPVLKSPTIPFFDPQIP, GRVM(+15.99)PVLKSPTIPFFDPQIP                                                                   | Immunomodulatory         |
|                 |                     | VMPVLKSPTIPFFDPQIPK, VM(+15.99)PVLKSPTIPFFDPQIPK                                                                     | Immunomodulatory         |
|                 |                     | LTDLENLHLPLP                                                                                                         | ACE-inhibitory           |
|                 |                     | ETIESLSSEESITEY, ETIES(+79.97)LS(+79.97)SSEESITEY, ETIESLSSEES(+79.97)ITEY, ETIES(+79.97)LS(+79.97)SS(+79.97)EESITEY | Increase cellular growth |
|                 |                     | LNPTHQIYPVTQPLAPVHNPIS                                                                                               | Antimicrobial            |

|  |                                                                                                                                                    |                          |
|--|----------------------------------------------------------------------------------------------------------------------------------------------------|--------------------------|
|  | MPVLKSPTIPFFDPQIP,<br>M(+15.99)PVLKSPTIPFFDPQIP<br>K                                                                                               | Immunomodulatory         |
|  | TQPLAPVHNPISV                                                                                                                                      | Antimicrobial            |
|  | MPVLKSPTIPFFDPQIP,<br>M(+15.99)PVLKSPTIPFFDPQIP                                                                                                    | Immunomodulatory         |
|  | NQELLLNPTHQIYPVTQPLAP<br>VHNPIS                                                                                                                    | Antimicrobial            |
|  | NQELLLNPTHQIYP                                                                                                                                     | Antimicrobial            |
|  | LLNPTHQIYPVTQPLAPVHNP<br>ISV,<br>LLNPTHQIYPVTQPLAPVHNP<br>IS(+79.97)V                                                                              | Antimicrobial            |
|  | TIESLSSEESITEYK,<br>TIESLSS(+79.97)SEESITEYK,<br>TIESLS(+79.97)SS(+79.97)EESI<br>TEYK,<br>TIES(+79.97)LS(+79.97)S(+79.9<br>7)SEESITEYK             | Increase cellular growth |
|  | LNQELLLNPTHQIYPVTQPLA<br>PVHNPISV                                                                                                                  | Antimicrobial            |
|  | DLENLHLPLP                                                                                                                                         | ACE-inhibitory           |
|  |                                                                                                                                                    | Antimicrobial            |
|  | NQELLLNPTHQIYPVTQ                                                                                                                                  | Antimicrobial            |
|  | VLSPTIPFFDPQIP                                                                                                                                     | Increase cellular growth |
|  | LNQELLLNPTHQIYPVTQPLA<br>PVHNPIS                                                                                                                   | Antimicrobial            |
|  | YPVTQPLAPVHNPISV,<br>YPVTQPLAPVHNPIS(+79.97)V                                                                                                      | Antimicrobial            |
|  | RETIESLSSEESITEYK,<br>RETIESLS(+79.97)SSEESITEY<br>K,<br>RETIESLS(+79.97)SS(+79.97)E<br>ESITEYK,<br>RET(+79.97)IESLSS(+79.97)S(+<br>79.97)EESITEYK | Increase cellular growth |
|  | TDLENLHLPLP                                                                                                                                        | ACE-inhibitory           |
|  |                                                                                                                                                    | Antimicrobial            |
|  | LLNQELLLNPTHQIYPVTQPL<br>APVHNPIS                                                                                                                  | Antimicrobial            |
|  | NPTHQIYPVTQPLAPVHNPIS<br>V,                                                                                                                        | Antimicrobial            |

|  |                                                                                                                            |                          |
|--|----------------------------------------------------------------------------------------------------------------------------|--------------------------|
|  | NPTHQIYPVTQPLAPVHNPIS(+79.97)V                                                                                             |                          |
|  | ETIESLSSSEESITEYKQKVE, ETIESLSS(+79.97)S(+79.97)EESITEYKQKVE                                                               | Increase cellular growth |
|  | T(+79.97)IESLSSSEESITEY, TIESLSSSEESITEY, T(+79.97)IESLSSS(+79.97)EESITEY                                                  | Increase cellular growth |
|  | QDKIYPSFQPQPL                                                                                                              | ACE-inhibitory           |
|  | NQELLLNPTHQIYPV                                                                                                            | Antimicrobial            |
|  | LLNQELLLNPTHQIYPV                                                                                                          | Antimicrobial            |
|  | VLKSPTIPFFDPQIPK                                                                                                           | Increase cellular growth |
|  | LLLNPTHQIYPVTQPLAPVHNPI                                                                                                    | Antimicrobial            |
|  | LLLNQELLLNPTHQIYPVTQPLAPVHNPISV                                                                                            | Antimicrobial            |
|  | QIYPVTQPLAPVHNPISV                                                                                                         | Antimicrobial            |
|  | NQELLLNPTHQIYPVTQPLAPVH                                                                                                    | Antimicrobial            |
|  | NQELLLNPTHQIYPVTQPLAPVHNPI                                                                                                 | Antimicrobial            |
|  | VPQPIPQ                                                                                                                    | ACE-inhibitory           |
|  | DLENLHLPLLL                                                                                                                | ACE-inhibitory           |
|  |                                                                                                                            | Antimicrobial            |
|  | ELLLNPTHQIYPVTQPLAPVHNPI                                                                                                   | Antimicrobial            |
|  | RETIESLSSSEESITEY, RETIESLSS(+79.97)SEESITEY, RETIESLSSS(+79.97)EESIT(+79.97)EY, RETIES(+79.97)LS(+79.97)S(+79.97)SEESITEY | Increase cellular growth |
|  | NQELLLNPTHQIYPVT                                                                                                           | Antimicrobial            |
|  | TIPFFDPQIPK                                                                                                                | Increase cellular growth |
|  | LNQELLLNPTHQIYPV                                                                                                           | Antimicrobial            |
|  | LLLNPTHQIYPVTQPLAPVHNPI, LLLNPTHQIYPVTQPLAPVHNPI(+79.97)V                                                                  | Antimicrobial            |
|  | ELLLNPTHQIYPVTQPLAPVHNPI                                                                                                   | Antimicrobial            |

|  |                                                                                                                                                             |                               |
|--|-------------------------------------------------------------------------------------------------------------------------------------------------------------|-------------------------------|
|  | ETIESLSS(+79.97)S(+79.97)EE<br>SITEYKQ,<br>ETIESLSSSEESITEYKQ,<br>ETIESLS(+79.97)SSEESITEYK<br>Q,<br>ETIESLS(+79.97)S(+79.97)S(+7<br>9.97)EESITEYKQ         | Increase cellular growth      |
|  | DLENLHLPLPL                                                                                                                                                 | ACE-inhibitory                |
|  |                                                                                                                                                             | Antimicrobial                 |
|  | RETIESLSS(+79.97)S(+79.97)E<br>ESITEYKQK,<br>RETIESLSSSEESITEYKQK,<br>RETIESLSSS(+79.97)EESITEY<br>KQK,<br>RETIESLS(+79.97)S(+79.97)S(+<br>79.97)EESITEYKQK | Increase cellular growth      |
|  | LWSVPQPK                                                                                                                                                    | Antioxidant                   |
|  |                                                                                                                                                             | ACE-inhibitory                |
|  | YPSFQPQLI                                                                                                                                                   | ACE-inhibitory                |
|  | PTIPFFDPQIPKLT                                                                                                                                              | Increase cellular growth      |
|  | RETIESLSS(+79.97)S(+79.97)E<br>ESITEYKQKVE,<br>RETIESLSSSEESITEYKQKVE,<br>RETIESLS(+79.97)S(+79.97)S(+<br>79.97)EESITEYKQKVE                                | Increase cellular growth      |
|  | LNPTHQIYPVTQPLAPVHNPIS<br>V                                                                                                                                 | Antimicrobial                 |
|  | YPFVEPIP                                                                                                                                                    | Opioid                        |
|  |                                                                                                                                                             | Anticancer                    |
|  |                                                                                                                                                             | promote beta-cell development |
|  | ETIESLSSS(+79.97)EESITEYK,<br>ETIESLSSSEESITEYK,<br>ET(+79.97)IES(+79.97)LSSSEE<br>SITEYK,<br>ETIES(+79.97)LS(+79.97)S(+79.<br>97)SEESITEYK                 | Increase cellular growth      |
|  | QALLNQELLLNPTHQIYPVT<br>QPLAPVHNPISV                                                                                                                        | Antimicrobial                 |
|  | PFFDPQIPK                                                                                                                                                   | ACE-inhibitory                |
|  | DTVYTKGRVMP,<br>DTVYTKGRVM(+15.99)P                                                                                                                         | ACE-inhibitory                |
|  | IESLSS(+79.97)SEESITEYK,<br>IESLSSSEESITEYK,                                                                                                                | Increase cellular growth      |

|  |                                                                                                                                             |                          |
|--|---------------------------------------------------------------------------------------------------------------------------------------------|--------------------------|
|  | IES(+79.97)LS(+79.97)SS(+79.97)EESITEYK                                                                                                     |                          |
|  | ETIESLSS(+79.97)S(+79.97)EESITEYKQK,<br>ETIESLSSSEESITEYKQK,<br>ETIESLSSS(+79.97)EESITEYKQK                                                 | Increase cellular growth |
|  | SPTIPFFDPQIPKLT                                                                                                                             | Increase cellular growth |
|  | VPYPQRA                                                                                                                                     | Antioxidant              |
|  |                                                                                                                                             | Antimicrobial            |
|  |                                                                                                                                             | ACE-inhibitory           |
|  |                                                                                                                                             | Antioxidant              |
|  | PVTQPLAPVHNPISV                                                                                                                             | Antimicrobial            |
|  | GRVMPVLKSPTIPFFDPQIPKLT,<br>GRVM(+15.99)PVLKSPTIPFFDPQIPKLT                                                                                 | Immunomodulatory         |
|  | IPFFDPQIPK                                                                                                                                  | ACE-inhibitory           |
|  | GRVM(+15.99)PVLKSPTIPFFDPQIPK,<br>GRVMPVLKSPTIPFFDPQIPK                                                                                     | Immunomodulatory         |
|  | PVLKSPTIPFFDPQIP                                                                                                                            | Immunomodulatory         |
|  | SPTIPFFDPQIPKLT                                                                                                                             | Increase cellular growth |
|  | ETIESLSSSEESITE,<br>ET(+79.97)IESLSSSEESITE                                                                                                 | Increase cellular growth |
|  | LKSPTIPFFDPQIPK                                                                                                                             | Increase cellular growth |
|  | VTQPLAPVHNPISV                                                                                                                              | Antimicrobial            |
|  | RETIESLSS(+79.97)S(+79.97)EESITEYKQ,<br>RETIESLSSS(+79.97)EESITEYKQ,<br>RETIESLSSSEESITEYKQ,<br>RETIESLS(+79.97)S(+79.97)S(+79.97)EESITEYKQ | Increase cellular growth |
|  | LLNPTHQIYPVTQPLAPVHNP                                                                                                                       | Antimicrobial            |
|  | IYPVTQPLAPVHNPISV                                                                                                                           | Antimicrobial            |
|  | QELLLNPTHQIYPVTQPLAPVHNPIS                                                                                                                  | Antimicrobial            |
|  | LTDLENLH                                                                                                                                    | ACE-inhibitory           |
|  | TIESLSSSEESITEYKQKVE                                                                                                                        | Increase cellular growth |
|  | ETIESLSSSEESITEYKQKV                                                                                                                        | Increase cellular growth |
|  | SPTIPFFDPQIPKLT                                                                                                                             | Increase cellular growth |
|  | YPSFQPQLIYP                                                                                                                                 | ACE-inhibitory           |
|  | KDTVYTKGRVMP,<br>KDTVYTKGRVM(+15.99)P                                                                                                       | ACE-inhibitory           |
|  | PTIPFFDPQIPK                                                                                                                                | Increase cellular growth |

|  |                                                                     |                          |
|--|---------------------------------------------------------------------|--------------------------|
|  | LNQELLLNPTHQIYP                                                     | Antimicrobial            |
|  | ALLLNQELLLNPTHQIYPVTQ<br>PLAPVHNPIV                                 | Antimicrobial            |
|  | LLNQELLLNPTHQIYPVTQPL<br>APVHNPI                                    | Antimicrobial            |
|  | HQIYPVTQPLAPVHNPIV                                                  | Antimicrobial            |
|  | NQELLLNPTHQIYPVTQP                                                  | Antimicrobial            |
|  | KSPTIPFFDPQIPK                                                      | Increase cellular growth |
|  | DLENLHLPL                                                           | ACE-inhibitory           |
|  | LHLPLPLLQP                                                          | ACE-inhibitory           |
|  | FFDPQIPK                                                            | ACE-inhibitory           |
|  | TVYTKGRVMPVL,<br>TVYTKGRVM(+15.99)PVL                               | ACE-inhibitory           |
|  | LLNQELLLNPTHQIYP                                                    | Antimicrobial            |
|  | ELLLNPTHQIYPVTQPLAPVH<br>NP                                         | Antimicrobial            |
|  | LNQELLLNPTHQIYPVTQPLA<br>PVHNPI                                     | Antimicrobial            |
|  | QELLLNPTHQIYPV                                                      | Antimicrobial            |
|  | DTVYTKGRVMPV,<br>DTVYTKGRVM(+15.99)PV                               | ACE-inhibitory           |
|  | YPVTQPLAPVHNPIV                                                     | Antimicrobial            |
|  | PTIPFFDPQIPKL                                                       | Increase cellular growth |
|  | ENLHLPLPLL                                                          | ACE-inhibitory           |
|  |                                                                     | Antimicrobial            |
|  | GRVMPVLKSPTIPFFDPQIPKL<br>T,<br>GRVM(+15.99)PVLKSPTIPFFD<br>PQIPKLT | Immunomodulatory         |
|  | IYPVTQPLAPVHNPIV                                                    | Antimicrobial            |
|  | VMPVLKSPTIPFFDPQIPKLT<br>,<br>VM(+15.99)PVLKSPTIPFFDPQ<br>IPKLT     | Immunomodulatory         |
|  | TIPFFDPQIP                                                          | ACE-inhibitory           |
|  | IESLSS(+79.97)S(+79.97)EESIT<br>EYKQ                                | Increase cellular growth |
|  | PVLKSPTIPFFDPQIPK                                                   | Immunomodulatory         |
|  | TDLENLHLPLPL                                                        | Antimicrobial            |
|  | PVLKSPTIPFFDPQIPKLT                                                 | Immunomodulatory         |
|  | QALLLNQELLLNPTHQIYPV                                                | Antimicrobial            |

|                                                                                           |                                 |
|-------------------------------------------------------------------------------------------|---------------------------------|
| NLHLPLPL                                                                                  | ACE-inhibitory                  |
| MPVLKSPTIPFFDPQIPKLT,<br>M(+15.99)PVLKSPTIPFFDPQIP<br>KLT                                 | Immunomodulatory                |
| TVYTKGRV                                                                                  | ACE-inhibitory                  |
| YPVTQPLAPVHNPI                                                                            | Antimicrobial                   |
| ALLNQELLLNPTHQIYPVTQ<br>PLAPVHNPI                                                         | Antimicrobial                   |
| LLLNPTHQIYPVTQPLAPVHN<br>P                                                                | Antimicrobial                   |
| TIESLSS(+79.97)S(+79.97)EESI<br>TEYKQ,<br>TIESLSSSEESITEYKQ,<br>TIESLSS(+79.97)SEESITEYKQ | Increase cellular growth        |
| VM(+15.99)PVLKSPTIPFFDPQ<br>IP, VMPVLKSPTIPFFDPQIP                                        | Immunomodulatory                |
| RETIESLSSSEESIT                                                                           | Increase cellular growth        |
| RETIESLSS(+79.97)S(+79.97)E<br>ESITE, RETIESLSSSEESITE                                    | Increase cellular growth        |
| ENLHLPLPLLQ                                                                               | ACE-inhibitory<br>Antimicrobial |
| IPFFDPQIP                                                                                 | ACE-inhibitory                  |
| DLENLHL                                                                                   | ACE-inhibitory                  |
| LLNQELLLNPTHQIYPVTQPL<br>APVH                                                             | Antimicrobial                   |
| LLLNQELLLNPTHQIYPVTQP<br>LAPVHNPI                                                         | Antimicrobial                   |
| LLNQELLLNPTHQIYPVTQPL<br>APVHNP                                                           | Antimicrobial                   |
| EIPYGFPL                                                                                  | ACE-inhibitory                  |
| DKIYPSFQQPLIYP                                                                            | ACE-inhibitory                  |
| VMPVLKSPTIPFFDPQIPKLT,<br>VM(+15.99)PVLKSPTIPFFDPQ<br>IPKLT                               | Immunomodulatory                |
| TDLENLHLP                                                                                 | ACE-inhibitory                  |
| TIPFFDPQIPKL                                                                              | Increase cellular growth        |
| DTVYTKGRVM(+15.99)                                                                        | ACE-inhibitory                  |
| LNQELLLNPTHQIYPVTQ                                                                        | Antimicrobial                   |
| IYPSFQQPLIYP                                                                              | ACE-inhibitory                  |
| LNQELLLNPTHQIYPVTQPLA<br>PVHNP                                                            | Antimicrobial                   |
| LLNQELLLNPTHQIY                                                                           | Antimicrobial                   |
| NQELLLNPTHQIYPVTQPLAP<br>VHN                                                              | Antimicrobial                   |

|        |      |                                                                   |                          |
|--------|------|-------------------------------------------------------------------|--------------------------|
|        |      | LNQELLNPTHQIYPVTQPLA<br>PVH                                       | Antimicrobial            |
|        |      | PVTQPLAPVHNPIS                                                    | Antimicrobial            |
|        |      | ELLLNPTHQIYPVTQPLAPVH<br>N                                        | Antimicrobial            |
|        |      | IYPSFQPQPLI                                                       | ACE-inhibitory           |
|        |      | LKSPTIPFFDPQIP                                                    | Increase cellular growth |
|        |      | LNQELLNPTHQIYPVTQP                                                | Antimicrobial            |
|        |      | EIPYGFPLPQ                                                        | ACE-inhibitory           |
|        |      | YPVTQPLAPVHNP                                                     | Antimicrobial            |
|        |      | DKIYPSFQPQPL                                                      | ACE-inhibitory           |
|        |      | LLLNQELLNPTHQIYPVTQP<br>LAPVHNPI                                  | Antimicrobial            |
|        |      | QELLLNPTHQIYPVTQPLAPV<br>HNP                                      | Antimicrobial            |
|        |      | RVMPVLKSPTIPFFDPQIP                                               | Immunomodulatory         |
|        |      | ENLHLPLP                                                          | ACE-inhibitory           |
|        |      | LTDLENLHLP                                                        | ACE-inhibitory           |
|        |      | LTDLENLHPL                                                        | ACE-inhibitory           |
|        |      | LENLHLPLP                                                         | ACE-inhibitory           |
|        |      | WSVPQPK                                                           | Antioxidant              |
|        |      |                                                                   | ACE-inhibitory           |
|        |      | LHLPLPLL                                                          | ACE-inhibitory           |
|        |      | KSPTIPFFDPQIP                                                     | Increase cellular growth |
|        |      | PVTQPLAPVHNP                                                      | Antimicrobial            |
|        |      | SFQPQPLIYPF                                                       | ACE-inhibitory           |
|        |      | HQIYPVTQPLAPVHNP                                                  | Antimicrobial            |
|        |      | PTIPFFDPQIP                                                       | Increase cellular growth |
|        |      | QELLLNPTHQIYPVTQPLAPV<br>HNPI                                     | Antimicrobial            |
|        |      | LNQELLNPTHQIYPVT                                                  | Antimicrobial            |
|        |      | EHQDKIYPSFQPQPLIYP                                                | ACE-inhibitory           |
|        |      | GRVMPVLKSPTIPFFDPQIPKL<br>,<br>GRVM(+15.99)PVLKSPTIPFFD<br>PQIPKL | Immunomodulatory         |
|        |      | ENLHLPLPLLQP                                                      | ACE-inhibitory           |
|        |      | QELLLNPTHQIYPVT                                                   | Antimicrobial            |
|        |      | IYPSFQPQPLIYPF                                                    | ACE-inhibitory           |
|        |      | RVMPVLKSPTIPFFDPQIPK                                              | Immunomodulatory         |
| P07498 | CSN3 | NPYVPRT                                                           | Antioxidant              |



|  |  |             |                |
|--|--|-------------|----------------|
|  |  | NNPYVPR     | Antioxidant    |
|  |  | NPYVPR      | Antioxidant    |
|  |  | NPAVVRP     | ACE-inhibitory |
|  |  | NPAVVRPH    | ACE-inhibitory |
|  |  | TYYANPAVVRP | ACE-inhibitory |
|  |  | ANPAVVRPHA  | ACE-inhibitory |
