# Supplementary material for: Peptidome profiling of human, bovine, and donkey colostrum through label-free quantitative analysis reveals proteolysis of milk proteins
Source: Royal Society of Chemistry journal article supplement (doi:10.1039/d4fo00689e), 2024-01-01
Supplement: d4fo00689e5.pdf [file d4fo00689e5.pdf]

Table S3. Bioactive peptides present in bovine colostrum.

| Parent proteins | Protein description | Peptides                                                                                                                                                                 | Function               |
|-----------------|---------------------|--------------------------------------------------------------------------------------------------------------------------------------------------------------------------|------------------------|
| P02662          | CSN1S1              | EDVPSERY                                                                                                                                                                 | Osteoanabolic          |
|                 |                     | VAPFPEVFGK                                                                                                                                                               | ACE-inhibitory         |
|                 |                     |                                                                                                                                                                          | Antioxidant            |
|                 |                     | HPIKHQGLPQEVLNEN                                                                                                                                                         | Antioxidant            |
|                 |                     | VPQLEIVPNS(+79.97)AEER , VPQLEIVPNSAEER                                                                                                                                  | Promote calcium uptake |
|                 |                     | IGSENSEKTTMP, IGSENSEKTTM(+15.99)P, IGS(+79.97)ENSEKTTM(+15.99)P                                                                                                         | ACE-inhibitory         |
|                 |                     | GLPQEVLENENLL                                                                                                                                                            | Antioxidant            |
|                 |                     | GLPQEVLENENLLR                                                                                                                                                           | Antioxidant            |
|                 |                     | FVAPFPEVFGKEK                                                                                                                                                            | ACE-inhibitory         |
|                 |                     | YKVPQLEIVPNS(+79.97)AEER, YKVPQLEIVPNSAEER                                                                                                                               | Promote calcium uptake |
|                 |                     | YVPLGTQYTDAPSFSDIPN PIGSENSEKTTM(+15.99)P, YVPLGTQYTDAPSFSDIPN PIGSENSEKTTMP, YVPLGTQYTDAPSF(+79.97)DIPNPIGSENSEKTTM(+15.99)P, YVPLGTQYTDAPSFSDIPN PIGS(+79.97)ENSEKTTMP | ACE-inhibitory         |
|                 |                     | EDVPSER                                                                                                                                                                  | Osteoanabolic          |
|                 |                     | VLNENLLRF                                                                                                                                                                | Antimicrobial          |
|                 |                     | HQGLPQEVLENENLL                                                                                                                                                          | Antioxidant            |
|                 |                     | LNENLLRF                                                                                                                                                                 | Antimicrobial          |
|                 |                     | VPQLEIVPNS(+79.97)AEER LHS, VPQLEIVPNSAEERLHS                                                                                                                            | Promote calcium uptake |
|                 |                     | NENLLRF                                                                                                                                                                  | ACE-inhibitory         |
|                 |                     | HQGLPQEVLNEN                                                                                                                                                             | Antioxidant            |
|                 |                     | YKVPQLEIVPNS(+79.97)AEERLHSM, YKVPQLEIVPNSAEERLHSM(+15.99), YKVPQLEIVPNS(+79.97)AEERLHSM(+15.99), YKVPQLEIVPNSAEERLHS                                                    | Promote calcium uptake |

|  |                                                                                         |                               |
|--|-----------------------------------------------------------------------------------------|-------------------------------|
|  | M                                                                                       |                               |
|  | APFPEVFGKE                                                                              | ACE-inhibitory<br>Antioxidant |
|  | KHPIKHQGLPQEVLENL                                                                       | Antimicrobial                 |
|  | L                                                                                       | Immunomodulatory              |
|  | VAPFPEVFGKE                                                                             | ACE-inhibitory<br>Antioxidant |
|  | RPKHPIKHQGLPQEVLE                                                                       | Antimicrobial                 |
|  | N                                                                                       | Immunomodulatory              |
|  | PFPEVFGKEKV                                                                             | Antioxidant                   |
|  | IGSENSEKTT                                                                              | ACE-inhibitory                |
|  | EQLRLKKY                                                                                | Antimicrobial                 |
|  | TDAPSFSDIPNPIGSENSEK<br>TTM(+15.99)P,<br>TDAPSFSDIPNPIGSENSEK<br>TTMP                   | ACE-inhibitory                |
|  | IKHQGLPQEVLENLL                                                                         | Antioxidant                   |
|  | APFPEVFGKEK                                                                             | Antioxidant                   |
|  | YVPLGTQYTDAPSFSDIPN<br>PIGSENSEKTTM(+15.99),<br>YVPLGTQYTDAPSFSDIPN<br>PIGSENSEKTTM     | ACE-inhibitory                |
|  | YVPLGTQYTDAPSFSDIPN<br>PIGSENSEKTTMPL,<br>YVPLGTQYTDAPSFSDIPN<br>PIGSENSEKTTM(+15.99)PL | ACE-inhibitory                |
|  | QYTDAPSFSDIPNPIGSENS<br>EKTTM(+15.99)P,<br>QYTDAPSFSDIPNPIGSENS<br>EKTTMP               | ACE-inhibitory                |
|  | LEQLRL                                                                                  | Antimicrobial                 |
|  | HPIKHQGLPQEV                                                                            | Antimicrobial                 |
|  | FFVAPFPEVFGK                                                                            | ACE-inhibitory                |
|  | NPIGSENSEKTTM(+15.99)<br>P, NPIGSENSEKTTMP                                              | ACE-inhibitory                |
|  | GTQYTDAPSFSDIPNPIGSE<br>NSEKTTMP,<br>GTQYTDAPSFSDIPNPIGSE<br>NSEKTTM(+15.99)P           | ACE-inhibitory                |
|  | TQYTDAPSFSDIPNPIGSEN<br>SEKTTM(+15.99)P,<br>TQYTDAPSFSDIPNPIGSEN<br>SEKTTMP             | ACE-inhibitory                |

|                |                |                                                                                                                                                                |                               |
|----------------|----------------|----------------------------------------------------------------------------------------------------------------------------------------------------------------|-------------------------------|
|                |                | RPKHPIKHQGLPQEVLENE                                                                                                                                            | Antimicrobial                 |
|                |                | NLLR                                                                                                                                                           | Immunomodulatory              |
|                |                | PIGSENSEKTTM(+15.99)PLW, PIGSENSEKTTMPLW                                                                                                                       | ACE-inhibitory                |
|                |                | VPQLEIVPNS(+79.97)AEERLH, VPQLEIVPNSAEERLH                                                                                                                     | Promote calcium uptake        |
|                |                | YKVPQLEIVPNS(+79.97)AEERLH, YKVPQLEIVPNSAEERLH                                                                                                                 | Promote calcium uptake        |
|                |                | HPIKHQGLPQEVLENE                                                                                                                                               | Antioxidant                   |
|                |                | VAPFPEVFGKEKVNELS                                                                                                                                              | induce macedocin biosynthesis |
|                |                | FPEVFGKEK                                                                                                                                                      | Antioxidant                   |
|                |                | RPKHPIKHQGLPQEVLENE                                                                                                                                            | Antimicrobial                 |
|                |                | NL                                                                                                                                                             | Immunomodulatory              |
|                |                | KEDVPSE                                                                                                                                                        | Osteoanabolic                 |
|                |                | QYTDAPSFSDIPNPIGSENSEKTTMPLW, QYTDAPSFSDIPNPIGSENSEKTTM(+15.99)PLW, QYTDAPSFSDIPNPIGS(+79.97)ENSEKTTM(+15.99)PLW, QYTDAPSFSDIPNPIGSENSEKTTMPLW(+79.97)EKTMMPLW | ACE-inhibitory                |
|                |                | FPEVFGKEKV                                                                                                                                                     | Antioxidant                   |
|                |                | FVAPFPEVFGKEKVNE                                                                                                                                               | induce macedocin biosynthesis |
|                |                | YYVPLGTQYTDAPSFSDIPNPIGSENSEKTTM(+15.99)P, YYVPLGTQYTDAPSFSDIPNPIGSENSEKTTMP                                                                                   | ACE-inhibitory                |
|                |                | LKKYKVPQLEIVPNS(+79.97)AEER, LKKYKVPQLEIVPNSAEER                                                                                                               | Promote calcium uptake        |
|                |                | YKVPQLEIVPNS(+79.97)AEERLHS, YKVPQLEIVPNSAEERLHS                                                                                                               | Promote calcium uptake        |
|                |                | HPIKHQGLPQEVLENE                                                                                                                                               | Antioxidant                   |
|                |                | PFPEVFGK                                                                                                                                                       | ACE-inhibitory                |
|                |                |                                                                                                                                                                | Antioxidant                   |
| LEQLRLK        | Antimicrobial  |                                                                                                                                                                |                               |
| PIGSENSEKTTMP, | ACE-inhibitory |                                                                                                                                                                |                               |

|  |                                                                                                                                                                                                               |                        |
|--|---------------------------------------------------------------------------------------------------------------------------------------------------------------------------------------------------------------|------------------------|
|  | PIGSENSEKTTM(+15.99)P                                                                                                                                                                                         |                        |
|  | IGSENSEKTTMPL,<br>IGSENSEKTTM(+15.99)PL,<br>IGS(+79.97)ENSEKTTM(+15.99)PL                                                                                                                                     | ACE-inhibitory         |
|  | KHPIKHQGLPQEVLENL<br>LR                                                                                                                                                                                       | Antimicrobial          |
|  |                                                                                                                                                                                                               | Immunomodulatory       |
|  | FVAPFPEVFGK                                                                                                                                                                                                   | ACE-inhibitory         |
|  | LEQLRLKKY                                                                                                                                                                                                     | Antimicrobial          |
|  | APFPEVFGK                                                                                                                                                                                                     | ACE-inhibitory         |
|  |                                                                                                                                                                                                               | Antioxidant            |
|  | RPKHPIK                                                                                                                                                                                                       | Antimicrobial          |
|  |                                                                                                                                                                                                               | ACE-inhibitory         |
|  | HPIKHQGLPQE                                                                                                                                                                                                   | Antimicrobial          |
|  | PIGSENSEKTT                                                                                                                                                                                                   | ACE-inhibitory         |
|  | FFVAPFPEVFGKEK                                                                                                                                                                                                | ACE-inhibitory         |
|  | FPEVFGK                                                                                                                                                                                                       | ACE-inhibitory         |
|  | KVPQLEIVPNS(+79.97)AE<br>ER, KVPQLEIVPNSAEER                                                                                                                                                                  | Promote calcium uptake |
|  | YLEQLLR                                                                                                                                                                                                       | Antimicrobial          |
|  | HQGLPQEVLENLLR                                                                                                                                                                                                | Antioxidant            |
|  | KDIGSESTEDQAM(+15.99)<br>EDI                                                                                                                                                                                  | Promote calcium uptake |
|  | DIGSESTEDQAM(+15.99)E<br>DIK,<br>DIGS(+79.97)ES(+79.97)TE<br>DQAMEDIK,<br>DIGS(+79.97)ES(+79.97)TE<br>DQAM(+15.99)EDIK,<br>DIGSESTEDQAMEDIK,<br>DIGSES(+79.97)TEDQAM(+15.99)EDIK,<br>DIGSES(+79.97)TEDQAMEDIK | Promote calcium uptake |
|  | NPIGSENSEKTT                                                                                                                                                                                                  | ACE-inhibitory         |
|  | HQGLPQEVLENL                                                                                                                                                                                                  | Antioxidant            |
|  | KVPQLEIVPNS(+79.97)AE<br>ERLHS,<br>KVPQLEIVPNSAEERLHS                                                                                                                                                         | Promote calcium uptake |
|  | SENSEKTTM(+15.99)PLW,<br>SENSEKTTMPLW                                                                                                                                                                         | ACE-inhibitory         |
|  | KYKVPQLEIVPNS(+79.97)<br>AEER,                                                                                                                                                                                | Promote calcium uptake |

|  |                                                                                                                              |                               |
|--|------------------------------------------------------------------------------------------------------------------------------|-------------------------------|
|  | KYKVPQLEIVPNSAEER                                                                                                            |                               |
|  | VAPFPEVFGKEKVNEL                                                                                                             | induce macedocin biosynthesis |
|  | EVLNENLLRF                                                                                                                   | Antimicrobial                 |
|  | FVAPFPEVFGKE                                                                                                                 | ACE-inhibitory                |
|  | VAPFPEVFGKEK                                                                                                                 | ACE-inhibitory                |
|  | RPKHPI                                                                                                                       | Antimicrobial                 |
|  |                                                                                                                              | ACE-inhibitory                |
|  | YKVPQ                                                                                                                        | ACE-inhibitory                |
|  | DIPNPIGSENSEKT                                                                                                               | Antimicrobial                 |
|  | RPKHPIKH                                                                                                                     | Antimicrobial                 |
|  |                                                                                                                              | ACE-inhibitory                |
|  | TDAPSFSDIPNPIGSENSEK<br>TTMPLW,<br>TDAPSFSDIPNPIGSENSEK<br>TTM(+15.99)PLW,<br>TDAPSFSDIPNPIGS(+79.97<br>)ENSEKTTM(+15.99)PLW | ACE-inhibitory                |
|  | HQGLPQEV                                                                                                                     | Antimicrobial                 |
|  | VAPFPEVF                                                                                                                     | ACE-inhibitory                |
|  | FPEVFGKE                                                                                                                     | ACE-inhibitory                |
|  |                                                                                                                              | Antioxidant                   |
|  | FSDIPNPIGSENSEKT                                                                                                             | Antimicrobial                 |
|  |                                                                                                                              | Antioxidant                   |
|  | KVPQLEIVPNS(+79.97)AE<br>ERLH,<br>KVPQLEIVPNSAEERLH                                                                          | Promote calcium uptake        |
|  | IKHQGLPQEVLNEN                                                                                                               | Antioxidant                   |
|  | YYVPLGTQYTDAPSFSDIP<br>NPIGSENSEKTTMPL,<br>YYVPLGTQYTDAPSFSDIP<br>NPIGSENSEKTTM(+15.99)<br>PL                                | ACE-inhibitory                |
|  | SDIPNPIGSENSEKT                                                                                                              | Antimicrobial                 |
|  | GSENSEKTTMP,<br>GSENSEKTTM(+15.99)P                                                                                          | ACE-inhibitory                |
|  | YTDAPSFSDIPNPIGSENSE<br>KTTM(+15.99)P,<br>YTDAPSFSDIPNPIGSENSE<br>KTTMP                                                      | ACE-inhibitory                |
|  | NPIGSENSEKTTMPL,<br>NPIGSENSEKTTM(+15.99)<br>PL                                                                              | ACE-inhibitory                |

|  |  |                                                                                                                                                                                   |                                   |
|--|--|-----------------------------------------------------------------------------------------------------------------------------------------------------------------------------------|-----------------------------------|
|  |  | DVPSERY                                                                                                                                                                           | ACE-inhibitory                    |
|  |  |                                                                                                                                                                                   | Osteoanabolic                     |
|  |  | VAPFPEVFG                                                                                                                                                                         | ACE-inhibitory                    |
|  |  | QYTDAPSFSDIPNPIGSENS<br>EKTTM(+15.99)PL,<br>QYTDAPSFSDIPNPIGSENS<br>EKTTMPL                                                                                                       | ACE-inhibitory                    |
|  |  | TDAPSFSDIPNPIGSENSEK<br>T                                                                                                                                                         | Antioxidant                       |
|  |  | YLEQLLRK                                                                                                                                                                          | Antimicrobial                     |
|  |  | FFVAPFPEVFGKEKV                                                                                                                                                                   | ACE-inhibitory                    |
|  |  | IGSENSEKTTM,<br>IGSENSEKTTM(+15.99)                                                                                                                                               | ACE-inhibitory                    |
|  |  | RPKHPIKHQGLPQEVLNE<br>NLL                                                                                                                                                         | Antimicrobial<br>Immunomodulatory |
|  |  | SDIPNPIGSENSEK                                                                                                                                                                    | Antimicrobial                     |
|  |  | IKHQGLPQEV                                                                                                                                                                        | Antimicrobial                     |
|  |  | TDAPSFSDIPNPIGSENSEK<br>TTM(+15.99)PL,<br>TDAPSFSDIPNPIGSENSEK<br>TTMPL                                                                                                           | ACE-inhibitory                    |
|  |  | LSKDIGSESTEDQAM(+15.<br>99)ED,<br>LSKDIGS(+79.97)ES(+79.97<br>)TEDQAM(+15.99)ED,<br>LSKDIGSESTEDQAMED,<br>LSKDIGSEST(+79.97)EDQ<br>AMED,<br>LS(+79.97)KDIGSESTEDQ<br>AM(+15.99)ED | Promote calcium<br>uptake         |
|  |  | KYKVPQ                                                                                                                                                                            | ACE-inhibitory                    |
|  |  | TDAPSFSDIPNPIGSENSEK                                                                                                                                                              | Antioxidant                       |
|  |  | NENLLR                                                                                                                                                                            | ACE-inhibitory                    |
|  |  | YKVPQLEIVPNSAEE,<br>YKVPQLEIVPNS(+79.97)A<br>EE                                                                                                                                   | Promote calcium<br>uptake         |
|  |  | VPSERYLG                                                                                                                                                                          | ACE-inhibitory                    |
|  |  | KYKVPQLEIVPNS(+79.97)<br>AEERLH,<br>KYKVPQLEIVPNSAEERLH                                                                                                                           | Promote calcium<br>uptake         |
|  |  | KHQGLPQEV                                                                                                                                                                         | Antimicrobial                     |
|  |  | IKHQGLPQE                                                                                                                                                                         | Antimicrobial                     |
|  |  | SDIPNPIGSENSEKTTM(+1                                                                                                                                                              | Antimicrobial                     |

|  |                                                                                                                                                                                                                       |                               |
|--|-----------------------------------------------------------------------------------------------------------------------------------------------------------------------------------------------------------------------|-------------------------------|
|  | 5.99),<br>SDIPNPIGSENSEKTTM                                                                                                                                                                                           |                               |
|  | SKDIGSESTEDQAM(+15.99)<br>ED,<br>SKDIGSESTEDQAMED,<br>SKDIGS(+79.97)ES(+79.97)<br>TEDQAMED,<br>SKDIGSES(+79.97)TEDQA<br>M(+15.99)ED,<br>SKDIGS(+79.97)ES(+79.97)<br>TEDQAM(+15.99)ED,<br>SKDIGS(+79.97)ESTEDQA<br>MED | Promote calcium uptake        |
|  | VPSERYL                                                                                                                                                                                                               | ACE-inhibitory                |
|  | LGYLEQLLR                                                                                                                                                                                                             | Anxiolytic<br>Antimicrobial   |
|  | DIGSESTEDQAM(+15.99)E<br>D, DIGSESTEDQAMED,<br>DIGS(+79.97)ESTEDQAM(+<br>15.99)ED,<br>DIGSES(+79.97)TEDQAME<br>D                                                                                                      | Promote calcium uptake        |
|  | GTQYTDAPSFSDIPNPIGSE<br>NSEKTTM(+15.99),<br>GTQYTDAPSFSDIPNPIGSE<br>NSEKTTM                                                                                                                                           | ACE-inhibitory                |
|  | KHQGLPQEVLENLL                                                                                                                                                                                                        | Antioxidant                   |
|  | KKYKVPQLEIVPNSAEER,<br>KKYKVPQLEIVPNS(+79.97)<br>AEER                                                                                                                                                                 | Promote calcium uptake        |
|  | YVPLGTQYTDAPSFSDIPN<br>PIGSENSEKT                                                                                                                                                                                     | ACE-inhibitory                |
|  | RPKHPIKHQ                                                                                                                                                                                                             | ACE-inhibitory                |
|  | YVPLGTQYTDAPSFSDIPN<br>PIGSENSEKTT                                                                                                                                                                                    | ACE-inhibitory                |
|  | YLEQLLRL                                                                                                                                                                                                              | Antimicrobial                 |
|  | KVPQLEIVPNSAEE,<br>KVPQLEIVPNS(+79.97)AE<br>E                                                                                                                                                                         | Promote calcium uptake        |
|  | VAPFPEVFGKEKVNELSK,<br>VAPFPEVFGKEKVNELS(+<br>79.97)K                                                                                                                                                                 | induce macedocin biosynthesis |
|  | FVAPFPEVFG                                                                                                                                                                                                            | ACE-inhibitory                |
|  | FVAPFPEVFGKEKVNELS                                                                                                                                                                                                    | induce macedocin              |

|  |                                                                                                                                                                                                                                                     |                                   |
|--|-----------------------------------------------------------------------------------------------------------------------------------------------------------------------------------------------------------------------------------------------------|-----------------------------------|
|  | K                                                                                                                                                                                                                                                   | biosynthesis                      |
|  | YLEQLLRKKY                                                                                                                                                                                                                                          | Antimicrobial                     |
|  | DIPNPIGSENSEKTT                                                                                                                                                                                                                                     | Antimicrobial                     |
|  | KYKVPQLEIVPNS(+79.97)<br>AEERLHS,<br>KYKVPQLEIVPNSAEERLH<br>S                                                                                                                                                                                       | Promote calcium uptake            |
|  | IKHQGLPQEVLENENLLR                                                                                                                                                                                                                                  | Antioxidant                       |
|  | SENSEKTTM(+15.99)P                                                                                                                                                                                                                                  | ACE-inhibitory                    |
|  | LNENLLR                                                                                                                                                                                                                                             | Antimicrobial                     |
|  | HPIKHQGLPQEVLENENLL<br>R                                                                                                                                                                                                                            | Antimicrobial<br>Immunomodulatory |
|  | DAPSFSDIPNPIGSENSEK                                                                                                                                                                                                                                 | Antioxidant                       |
|  | YVPLGTQYTDAPSFSDIPN<br>PIGSENSEKTTM(+15.99)PL<br>W,<br>YVPLGTQYTDAPSFSDIPN<br>PIGSENSEKTTMPLW                                                                                                                                                       | ACE-inhibitory                    |
|  | GYLEQLLR                                                                                                                                                                                                                                            | Anxiolytic<br>Antimicrobial       |
|  | SDIPNPIGSENSEKTT                                                                                                                                                                                                                                    | Antimicrobial                     |
|  | YKVPQLEIVPNS(+79.97)A,<br>YKVPQLEIVPNSA                                                                                                                                                                                                             | Promote calcium uptake            |
|  | KQM(+15.99)EAESISSEEI<br>VPNSVEQ,<br>KQMEAESISS(+79.97)EEI<br>VPNSVEQ,<br>KQMEAESISSEEIVPNSV<br>EQ,<br>KQM(+15.99)EAESISS(+79<br>.97)EEIVPNSVEQ,<br>KQM(+15.99)EAESIS(+79.9<br>7)S(+79.97)SEEIVPNSVEQ,<br>KQMEAESISS(+79.97)S(+79<br>.97)EEIVPNSVEQ | Immunomodulatory                  |
|  | VPQLEIVPNS(+79.97)AEER<br>L, VPQLEIVPNSAEERL                                                                                                                                                                                                        | Promote calcium uptake            |
|  | VPQLEIVPNSAEE,<br>VPQLEIVPNS(+79.97)AEE                                                                                                                                                                                                             | Promote calcium uptake            |
|  | KDIGSESTEDQAM(+15.99)<br>ED, KDIGSESTEDQAMED,<br>KDIGS(+79.97)ES(+79.97)T<br>EDQAM(+15.99)ED,<br>KDIGSES(+79.97)TEDQAM                                                                                                                              | Promote calcium uptake            |



|  |                                                                                    |                                  |
|--|------------------------------------------------------------------------------------|----------------------------------|
|  | (+15.99)ED,<br>KDIGSES(+79.97)TEDQAM<br>ED,<br>KDIGS(+79.97)ES(+79.97)T<br>EDQAMED |                                  |
|  | IGSENSEKTTM(+15.99)PL<br>W, IGSENSEKTTMPLW                                         | ACE-inhibitory                   |
|  | DVPSERYL                                                                           | ACE-inhibitory                   |
|  | FVAPFPEVFGKEKVNELS                                                                 | induce macedocin<br>biosynthesis |
|  | IGSESTEDQAMEDIK,<br>IGSESTEDQAM(+15.99)EDI<br>K                                    | Promote calcium<br>uptake        |
|  | TDAPSFSDIPNPIGSENSE                                                                | Antioxidant                      |
|  | PIGSENSEKTTM(+15.99)PL<br>, PIGSENSEKTTMPL                                         | ACE-inhibitory                   |
|  | PIKHQGLPQEVLNENLL                                                                  | Antioxidant                      |
|  | NPIGSENSEKTTM(+15.99)                                                              | ACE-inhibitory                   |
|  | PFPEVFGKEK                                                                         | Antioxidant<br>ACE-inhibitory    |
|  | KVPQLEIVPNSAE                                                                      | Promote calcium<br>uptake        |
|  | IKHQGLPQEVLNENL                                                                    | Antioxidant                      |
|  | QLLRLKKY                                                                           | Antimicrobial                    |
|  | TQYTDAPSFSDIPNPIGSEN<br>SEKTTM(+15.99)PL,<br>TQYTDAPSFSDIPNPIGSEN<br>SEKTTMPL      | ACE-inhibitory                   |
|  | GYLEQLLRLK                                                                         | Anxiolytic<br>Antimicrobial      |
|  | DAPSFSDIPNPIGSENSEKT<br>TMPLW,<br>DAPSFSDIPNPIGSENSEKT<br>TM(+15.99)PLW            | ACE-inhibitory                   |
|  | QGLPQEVLNENLL                                                                      | Antioxidant                      |
|  | RLKKYKVPQ                                                                          | Antimicrobial                    |
|  | IPNPIGSENSEKTT                                                                     | Antimicrobial                    |
|  | KHQGLPQEVLNENL                                                                     | Antioxidant                      |
|  | GLPQEVLNENLLRF                                                                     | Antioxidant                      |
|  | ENLLRFF                                                                            | ACE-inhibitory                   |
|  | EVLNENLLR                                                                          | Antimicrobial                    |
|  | KHQGLPQEVLNENLLR                                                                   | Antioxidant                      |
|  | KHQGLPQEVLNEN                                                                      | Antioxidant                      |

|  |  |                                                                                                         |                           |
|--|--|---------------------------------------------------------------------------------------------------------|---------------------------|
|  |  | KHQGLPQE                                                                                                | Antimicrobial             |
|  |  | VLNENLLR                                                                                                | Antimicrobial             |
|  |  | FFVAPFPEVFGKE                                                                                           | ACE-inhibitory            |
|  |  | IPNPIGSENSEKT                                                                                           | Antimicrobial             |
|  |  | IGSESTEDQAMED,<br>IGSESTEDQAM(+15.99)ED,<br>IGSES(+79.97)TEDQAM(+1<br>5.99)ED,<br>IGS(+79.97)ESTEDQAMED | Promote calcium<br>uptake |
|  |  | LGTQYTDAPSFSDIPNPIGS<br>ENSEKTTMP,<br>LGTQYTDAPSFSDIPNPIGS<br>ENSEKTTM(+15.99)P                         | ACE-inhibitory            |
|  |  | APSFSDIPNPIGSENSEKTT<br>M(+15.99)PLW,<br>APSFSDIPNPIGSENSEKTT<br>MPLW                                   | ACE-inhibitory            |
|  |  | ARPKHPIKH                                                                                               | ACE-inhibitory            |
|  |  | SKDIGSESTEDQAM(+15.99<br>)EDIK,<br>SKDIGSESTEDQAMEDIK                                                   | Promote calcium<br>uptake |
|  |  | IPNPIGSENSEKTTM(+15.9<br>9), IPNPIGSENSEKTTM                                                            | Antimicrobial             |
|  |  | RPKHPIKHQGL                                                                                             | ACE-inhibitory            |
|  |  | GSENSEKTTMPLW,<br>GSENSEKTTM(+15.99)PLW                                                                 | ACE-inhibitory            |
|  |  | TDAPSFSDIPNPIGSEN                                                                                       | Antioxidant               |
|  |  | DAPSFSDIPNPIGSENSEKT<br>TM(+15.99)PL,<br>DAPSFSDIPNPIGSENSEKT<br>TMPL                                   | ACE-inhibitory            |
|  |  | PLGTQYTDAPSFSDIPNPIG<br>SENSEKTTM(+15.99)P,<br>PLGTQYTDAPSFSDIPNPIG<br>SENSEKTTMP                       | ACE-inhibitory            |
|  |  | KYKVPQLEIVPNS(+79.97)<br>AEERL,<br>KYKVPQLEIVPNSAEERL                                                   | Promote calcium<br>uptake |
|  |  | SKDIGSESTEDQAM(+15.99<br>)EDI,<br>SKDIGSESTEDQAMEDI                                                     | Promote calcium<br>uptake |
|  |  | DAPSFSDIPNPIGSENSE                                                                                      | Antioxidant               |
|  |  | KKYKVPQLEIVPNSA,<br>KKYKVPQLEIVPNS(+79.97)                                                              | Promote calcium<br>uptake |

|  |                                                                        |                               |
|--|------------------------------------------------------------------------|-------------------------------|
|  | )A                                                                     |                               |
|  | YTDAPSFSDIPNPIGSENSEK                                                  | Antioxidant                   |
|  | HQGLPQEVLN                                                             | Antimicrobial                 |
|  | DIPNPIGSENSEKTTM(+15.99), DIPNPIGSENSEKTTM                             | Antimicrobial                 |
|  | SENSEKTTM(+15.99)PL, SENSEKTTMPL                                       | ACE-inhibitory                |
|  | TQYTDAPSFSDIPNPIGSENSEKTTM(+15.99)PLW, TQYTDAPSFSDIPNPIGSENSEKTTMPLW   | ACE-inhibitory                |
|  | YYVPLGTQYTDAPSFSDIPNPIGSENSEKTT                                        | ACE-inhibitory                |
|  | LKKYKVPQLEIVPNSAEE, LKKYKVPQLEIVPNS(+79.97)AEE                         | Promote calcium uptake        |
|  | QM(+15.99)EAESISSEEIVPNSVEQ                                            | Immunomodulatory              |
|  | SESTEDQAMEDIK, SESTEDQAM(+15.99)EDIK                                   | Promote calcium uptake        |
|  | KYKVPQLEIVPNS(+79.97)A, KYKVPQLEIVPNSA                                 | Promote calcium uptake        |
|  | GTQYTDAPSFSDIPNPIGSENSEKTTM(+15.99)PLW, GTQYTDAPSFSDIPNPIGSENSEKTTMPLW | ACE-inhibitory                |
|  | LGTQYTDAPSFSDIPNPIGSENSEKTTM(+15.99), LGTQYTDAPSFSDIPNPIGSENSEKTTM     | ACE-inhibitory                |
|  | YVPLGTQYTDAPSFSDIPNPIGSENSEK                                           | ACE-inhibitory                |
|  | FFVAPFPEVFGKEKVNEL                                                     | induce macedocin biosynthesis |
|  | DAPSFSDIPNPIGSENSEKT                                                   | Antioxidant                   |
|  | FVAPFPEVFGKEKVNEL                                                      | induce macedocin biosynthesis |
|  | ENLLRF                                                                 | ACE-inhibitory                |
|  | KDIGSESTEDQAM(+15.99)EDIK                                              | Promote calcium uptake        |
|  | DIPNPIGSENSEK                                                          | Antimicrobial                 |
|  | LKKYKVPQLEIVPNS(+79.97)A,                                              | Promote calcium uptake        |

|  |                                                                                                                                                                                                                |                                   |
|--|----------------------------------------------------------------------------------------------------------------------------------------------------------------------------------------------------------------|-----------------------------------|
|  | LKKYKVPQLEIVPNSA                                                                                                                                                                                               |                                   |
|  | YYVPLGTQYTDAPSFSDIP<br>NPIGSENSEKTTM(+15.99),<br>YYVPLGTQYTDAPSFSDIP<br>NPIGSENSEKTTM                                                                                                                          | ACE-inhibitory                    |
|  | VPLGTQYTDAPSFSDIPNPI<br>GSENSEKTT                                                                                                                                                                              | ACE-inhibitory                    |
|  | APSFSDIPNPIGSENSE                                                                                                                                                                                              | Antioxidant                       |
|  | APSFSDIPNPIGSENSEK                                                                                                                                                                                             | Antioxidant                       |
|  | DAPSFSDIPNPIGSENSEK<br>T                                                                                                                                                                                       | Antioxidant                       |
|  | HIQKEDVPSERYLGYLEQ<br>L                                                                                                                                                                                        | Antimicrobial                     |
|  | GTQYTDAPSFSDIPNPIGSE<br>NSEKTTMPL,<br>GTQYTDAPSFSDIPNPIGSE<br>NSEKTTM(+15.99)PL                                                                                                                                | ACE-inhibitory                    |
|  | PSFSDIPNPIGSENSEK                                                                                                                                                                                              | Antioxidant                       |
|  | PKHPIKHQGLPQEVLENEN<br>LLR                                                                                                                                                                                     | Antimicrobial<br>Immunomodulatory |
|  | VPLGTQYTDAPSFSDIPNPI<br>GSENSEKTTM(+15.99)P                                                                                                                                                                    | ACE-inhibitory                    |
|  | YTDAPSFSDIPNPIGSENSE<br>KTTM(+15.99)PLW,<br>YTDAPSFSDIPNPIGSENSE<br>KTTMPLW                                                                                                                                    | ACE-inhibitory                    |
|  | QM(+15.99)EAESISSEEIV<br>PNSVEQK,<br>QMEAESISSEEIVPNSVE<br>QK,<br>QM(+15.99)EAESIS(+79.97<br>)SEEIVPNSVEQK,<br>QM(+15.99)EAES(+79.97)IS<br>SS(+79.97)EEIVPNSVEQK,<br>QMEAESIS(+79.97)SS(+79.9<br>7)EEIVPNSVEQK | Immunomodulatory                  |
|  | QGLPQEVLENENL                                                                                                                                                                                                  | Antioxidant                       |
|  | YYVPLGTQYTDAPSFSDIP<br>NPIGSENSEK                                                                                                                                                                              | ACE-inhibitory                    |
|  | YKVPQLE                                                                                                                                                                                                        | ACE-inhibitory                    |
|  | FSDIPNPIGSENSEKTT                                                                                                                                                                                              | Antimicrobial<br>Antioxidant      |
|  | DIGSESTEDQAMEDIKQ,<br>DIGSESTEDQAM(+15.99)E                                                                                                                                                                    | Promote calcium<br>uptake         |

|  |                                                                        |                                      |
|--|------------------------------------------------------------------------|--------------------------------------|
|  | DIKQ                                                                   |                                      |
|  | VAPFPEV                                                                | Inhibition of cholesterol solubility |
|  | SFSDIPNPIGSENSEKT                                                      | Antimicrobial                        |
|  |                                                                        | Antioxidant                          |
|  | LGTQYTDAPSFSDIPNPIGSENSEKTTM(+15.99)PL, LGTQYTDAPSFSDIPNPIGSENSEKTTMPL | ACE-inhibitory                       |
|  | PIKHQGLPQEV                                                            | Antimicrobial                        |
|  | VAPFPEVFGKEKVNELSKD, VAPFPEVFGKEKVNELS(+79.97)KD                       | induce macedocin biosynthesis        |
|  | APSFSDIPNPIGSEN                                                        | Antioxidant                          |
|  | KKYKVPQLEIVPNS(+79.97)AEERLH, KKYKVPQLEIVPNSAEERLH                     | Promote calcium uptake               |
|  | QYTDAPSFSDIPNPIGSENSE                                                  | Antioxidant                          |
|  | GSENSEKTTMPL                                                           | ACE-inhibitory                       |
|  | HQGLPQEV                                                               | Antimicrobial                        |
|  | QEVLNENLLR                                                             | Antimicrobial                        |
|  | LGTQYTDAPSFSDIPNPIGSENSEKTT                                            | ACE-inhibitory                       |
|  | RPKHPIKHQGLPQEV                                                        | Antimicrobial                        |
|  | NLLRF                                                                  | Immunomodulatory                     |
|  | SFSDIPNPIGSENSEKTT                                                     | Antioxidant                          |
|  | PSFSDIPNPIGSENSEKTTM(+15.99)                                           | Antioxidant                          |
|  | KTTMPLW                                                                | Antimicrobial                        |
|  |                                                                        | ACE-inhibitory                       |
|  | DAPSFSDIPNPIGSEN                                                       | Antioxidant                          |
|  | APFPEVFG                                                               | ACE-inhibitory                       |
|  | YTDAPSFSDIPNPIGSENSEKTTM(+15.99)PL, YTDAPSFSDIPNPIGSENSEKTTMPL         | ACE-inhibitory                       |
|  | RPKHPIKHQG                                                             | ACE-inhibitory                       |
|  | KKYKVPQLEIVPNSAEE                                                      | Promote calcium uptake               |

|  |                                                                                       |                               |
|--|---------------------------------------------------------------------------------------|-------------------------------|
|  | FVAPFPEV                                                                              | ACE-inhibitory                |
|  | QYTDAPSFSDIPNPIGSENS<br>EKTT                                                          | ACE-inhibitory                |
|  | FSDIPNPIGSENSEK                                                                       | Antimicrobial                 |
|  |                                                                                       | Antioxidant                   |
|  | IPNPIGSENSEK                                                                          | Antimicrobial                 |
|  | PKHPIKHQGLPQEVLNEN<br>LL                                                              | Antimicrobial                 |
|  |                                                                                       | Immunomodulatory              |
|  | PFPEVFGKE                                                                             | Antioxidant                   |
|  |                                                                                       | ACE-inhibitory                |
|  | GSENSEKTTM                                                                            | ACE-inhibitory                |
|  | SKDIGSESTEDQAM(+15.99)<br>)EDIKQ,<br>SKDIGSESTEDQAMEDIKQ                              | Promote calcium uptake        |
|  | KYKVPQLEIVPNS(+79.97)<br>AEE,<br>KYKVPQLEIVPNSAEE                                     | Promote calcium uptake        |
|  | IKHQGLPQEVLN                                                                          | Antimicrobial                 |
|  | YKVPQLEIVPNSAE                                                                        | Promote calcium uptake        |
|  | YTDAPSFSDIPNPIGSENSE<br>KTTM(+15.99)                                                  | ACE-inhibitory                |
|  | KVPQLEIVPNSAEERL,<br>KVPQLEIVPNS(+79.97)AE<br>ERL                                     | Promote calcium uptake        |
|  | VPLGTQYTDAPSFSDIPNPI<br>GSENSEKTTM(+15.99)PL,<br>VPLGTQYTDAPSFSDIPNPI<br>GSENSEKTTMPL | ACE-inhibitory                |
|  | AESISSSEEIVPNSVEQ                                                                     | Immunomodulatory              |
|  | FSDIPNPIGSENSE                                                                        | Antimicrobial                 |
|  |                                                                                       | Antioxidant                   |
|  | PLGTQYTDAPSFSDIPNPIG<br>SENSEKTTM(+15.99)                                             | ACE-inhibitory                |
|  | KHPIKHQGLPQEVLNENL<br>LRF                                                             | Antimicrobial                 |
|  |                                                                                       | Immunomodulatory              |
|  | FVAPFPEVFGKEKVNELS<br>KD                                                              | induce macedocin biosynthesis |
|  | ARPKHPIK                                                                              | Antimicrobial                 |
|  | SFSDIPNPIGSENSE                                                                       | Antimicrobial                 |
|  |                                                                                       | Antioxidant                   |

|  |                                                                             |                               |
|--|-----------------------------------------------------------------------------|-------------------------------|
|  | YKVPQLEIVPNS(+79.97)AEERL,<br>YKVPQLEIVPNSAEERL                             | Promote calcium uptake        |
|  | PIKHQGLPQEVLENL                                                             | Antioxidant                   |
|  | HPIKHQGLPQEVLE                                                              | Antioxidant                   |
|  | IGSESTEDQAM(+15.99)EDIKQ,<br>IGSESTEDQAMEDIKQ                               | Promote calcium uptake        |
|  | RFFVAPFPEVFGKEKV                                                            | induce macedocin biosynthesis |
|  | DAPSFSDIPNPIGSENS                                                           | Antioxidant                   |
|  | APSFSDIPNPIGSENSEKT                                                         | Antioxidant                   |
|  | YYVPLGTQYTDAPSFSDIPNPIGSENSEK                                               | ACE-inhibitory                |
|  | TDAPSFSDIPNPIGSENS                                                          | Antioxidant                   |
|  | SFSDIPNPIGSENSEK                                                            | Antimicrobial                 |
|  |                                                                             | Antioxidant                   |
|  | YKVPQL                                                                      | ACE-inhibitory                |
|  | GTQYTDAPSFSDIPNPIGSENSEKTT                                                  | ACE-inhibitory                |
|  | FFVAPFPEVFGKEKVNELS                                                         | induce macedocin biosynthesis |
|  | LGTQYTDAPSFSDIPNPIGSENSEK                                                   | ACE-inhibitory                |
|  | APSFSDIPNPIGSENSEKTT                                                        | Antioxidant                   |
|  | TQYTDAPSFSDIPNPIGSENSEKTT                                                   | ACE-inhibitory                |
|  | GYLEQLLRL                                                                   | Anxiolytic                    |
|  |                                                                             | Antimicrobial                 |
|  | KYKVPQL                                                                     | ACE-inhibitory                |
|  | PLGTQYTDAPSFSDIPNPIGSENSEKTTMPL,<br>PLGTQYTDAPSFSDIPNPIGSENSEKTTM(+15.99)PL | ACE-inhibitory                |
|  | VLNENLLRFF                                                                  | Antimicrobial                 |
|  | KDIGSESTEDQAM(+15.99)EDIKQ                                                  | Promote calcium uptake        |
|  | ARPKHPIKHQ                                                                  | ACE-inhibitory                |
|  | GTQYTDAPSFSDIPNPIGSENSEKT                                                   | ACE-inhibitory                |
|  | PSFSDIPNPIGSENSEKTT                                                         | Antioxidant                   |
|  | HQGLPQEVLENLLRF                                                             | Antioxidant                   |
|  | APSFSDIPNPIGSE                                                              | Antioxidant                   |
|  | SKDIGSESTEDQAM(+15.99)                                                      | Promote calcium uptake        |

|        |        |                                         |                        |
|--------|--------|-----------------------------------------|------------------------|
|        |        | )E                                      | uptake                 |
|        |        | KDIGSESTEDQAM(+15.99)<br>E              | Promote calcium uptake |
|        |        | TDAPSFSDIPNPIGSE                        | Antioxidant            |
|        |        | DIPNPIGSEN                              | Antioxidant            |
|        |        | LRLKKYKVPQ                              | Antimicrobial          |
|        |        | LGTQYTDAPSFSDIPNPIGS<br>ENSEKT          | ACE-inhibitory         |
|        |        | TQYTDAPSFSDIPNPIGSEN<br>SEKTTM(+15.99)  | ACE-inhibitory         |
|        |        | KQMEAESISSSEEIVPNSV                     | Immunomodulatory       |
|        |        | SFSDIPNPIGS                             | Antioxidant            |
|        |        | PKHPIKH                                 | Antimicrobial          |
|        |        | EAESISSSEEIVPNSVEQ                      | Immunomodulatory       |
|        |        | DIGSESTEDQAM(+15.99)E<br>DIKQM(+15.99)  | Promote calcium uptake |
|        |        | LRLKKYKVP                               | Antimicrobial          |
| P02663 | CSN1S2 | GPIVLNPWDQVK                            | Antimicrobial          |
|        |        | VLNPWDQVK                               | Antimicrobial          |
|        |        | TKVIPYVRYL                              | Antimicrobial          |
|        |        | KPWIQPKTKVIP                            | Antimicrobial          |
|        |        | VIPYVRYL                                | Antimicrobial          |
|        |        | PYVRYL                                  | Antioxidant            |
|        |        |                                         | Antimicrobial          |
|        |        |                                         | ACE-inhibitory         |
|        |        | IVLNPWDQVK                              | Antimicrobial          |
|        |        | KTKLTEEEKNRLNFL                         | Antimicrobial          |
|        |        | FALPQYLK                                | Antioxidant            |
|        |        |                                         | ACE-inhibitory         |
|        |        | TKVIPYVRY                               | Antimicrobial          |
|        |        | KPWIQPKT                                | ACE-inhibitory         |
|        |        | IPYVRYL                                 | Antioxidant            |
|        |        |                                         | Antimicrobial          |
|        |        |                                         | ACE-inhibitory         |
|        |        | AM(+15.99)KPWIQPKTK,<br>AMKPWIQPKTK     | ACE-inhibitory         |
|        |        | AMKPWIQP,<br>AM(+15.99)KPWIQP           | ACE-inhibitory         |
|        |        | AM(+15.99)KPWIQPKT,<br>AMKPWIQPKT       | ACE-inhibitory         |
|        |        | VLNPWDQVKRN                             | Antimicrobial          |
|        |        | M(+15.99)KPWIQPKTKVIP,<br>MKPWIQPKTKVIP | Antimicrobial          |



|  |                                                                                          |                |
|--|------------------------------------------------------------------------------------------|----------------|
|  | TKVIPYVR                                                                                 | Antimicrobial  |
|  | RNAVPITPT                                                                                | Osteoanabolic  |
|  | AM(+15.99)KPWIQPKTKVI<br>P, AMKPWIQPKTKVIP                                               | Antimicrobial  |
|  | KVIPYVRYL                                                                                | Antimicrobial  |
|  | AM(+15.99)KPWIQPKTKVI<br>PYVRYL,<br>AMKPWIQPKTKVIPYVRY<br>L                              | Antimicrobial  |
|  | LNPWDQVK                                                                                 | Antimicrobial  |
|  | ALPQYLKT                                                                                 | Antioxidant    |
|  |                                                                                          | ACE-inhibitory |
|  | KVIPYVRY                                                                                 | Antimicrobial  |
|  | KTKLTEEEKNRLNF                                                                           | Antimicrobial  |
|  | VLNPWDQVQR                                                                               | Antimicrobial  |
|  | KFALPQYL                                                                                 | Antioxidant    |
|  |                                                                                          | ACE-inhibitory |
|  | FALPQYLKT                                                                                | Antioxidant    |
|  |                                                                                          | ACE-inhibitory |
|  | AM(+15.99)KPWIQPK,<br>AMKPWIQPK                                                          | ACE-inhibitory |
|  | YQKFPQY                                                                                  | Antioxidant    |
|  |                                                                                          | ACE-inhibitory |
|  | AM(+15.99)KPWIQPKTKVI<br>PY, AMKPWIQPKTKVIPY                                             | Antimicrobial  |
|  | KPWIQPK                                                                                  | ACE-inhibitory |
|  | GPIVLNPWDQV                                                                              | Antimicrobial  |
|  | KTKLTEEEKNRLN                                                                            | Antimicrobial  |
|  | AM(+15.99)KPWIQPKTKVI<br>PYVR,<br>AMKPWIQPKTKVIPYVR                                      | Antimicrobial  |
|  | M(+15.99)KPWIQPKTK,<br>MKPWIQPKTK                                                        | ACE-inhibitory |
|  | M(+15.99)KPWIQPKTKVIP<br>Y, MKPWIQPKTKVIPY                                               | Antimicrobial  |
|  | KRNAVPITPT                                                                               | Osteoanabolic  |
|  | KAM(+15.99)KPWIQP,<br>KAMKPWIQP                                                          | ACE-inhibitory |
|  | NM(+15.99)AINPSKEN,<br>NM(+15.99)AINPS(+79.97)K<br>EN, NMAINPSKEN,<br>NMAINPS(+79.97)KEN | ACE-inhibitory |
|  | VYQHQBKAM(+15.99)KPWI                                                                    | Antimicrobial  |

|  |                                                                   |                |
|--|-------------------------------------------------------------------|----------------|
|  | QPKTKVIPY,<br>VYQHQAAMKPKWIQPKTK<br>VIPY                          |                |
|  | TVYQHQ                                                            | ACE-inhibitory |
|  | TKKTKLTEEEKNRLNFL                                                 | Antimicrobial  |
|  | FLKKIS                                                            | Antimicrobial  |
|  | KPWIQPKTKVIPYVRYL                                                 | Antimicrobial  |
|  | KPWIQPKTKVIPY                                                     | Antimicrobial  |
|  | TVYQHQAAM(+15.99)KP<br>WIQPKTKVIP,<br>TVYQHQAAMKPKWIQPKTK<br>KVIP | Antimicrobial  |
|  | FLKKISQ                                                           | Antimicrobial  |
|  | IQPKTKVIPYVRYL                                                    | Antimicrobial  |
|  | KPWIQPKTKVIPYVR                                                   | Antimicrobial  |
|  | IVLNPWDQVKR                                                       | Antimicrobial  |
|  | YQKFPQYL                                                          | Antioxidant    |
|  |                                                                   | ACE-inhibitory |
|  | YQKFPQ                                                            | Antioxidant    |
|  |                                                                   | ACE-inhibitory |
|  | NAVITPTLN                                                         | Osteoanabolic  |
|  | VYQHQAAMKPKWIQPKTK<br>VIP,<br>VYQHQAAM(+15.99)KPKWI<br>QPKTKVIP   | Antimicrobial  |
|  | ALPQYLK                                                           | Antioxidant    |
|  |                                                                   | ACE-inhibitory |
|  | M(+15.99)KPKWIQ,<br>MKPKWIQ                                       | ACE-inhibitory |
|  | AM(+15.99)KPKWIQPKTKVI<br>PYV,<br>AMKPKWIQPKTKVIPYV               | Antimicrobial  |
|  | QAAM(+15.99)KPKWIQ,<br>QAAMKPKWIQ                                 | ACE-inhibitory |
|  | KISQRYQKFALPQYLK                                                  | Antimicrobial  |
|  | M(+15.99)KPKWIQPKTK,<br>MKPKWIQPKTK                               | ACE-inhibitory |
|  | KISQRYQKFALPQYLKT                                                 | Antimicrobial  |
|  | QPKTKVIPYVRYL                                                     | Antimicrobial  |
|  | KISQRYQKFALPQYL                                                   | Antimicrobial  |
|  | M(+15.99)KPKWIQPKTKVIP<br>YVRYL,<br>MKPKWIQPKTKVIPYVRYL           | Antimicrobial  |

|  |                                                                         |                |
|--|-------------------------------------------------------------------------|----------------|
|  | ISQRYQKFALPQYL                                                          | Antimicrobial  |
|  | FALPQYLKTV                                                              | Antioxidant    |
|  |                                                                         | ACE-inhibitory |
|  | QFYQKFPQYL                                                              | ACE-inhibitory |
|  | VYQHQAAM(+15.99)KPWI<br>QPKTKVIPYVRYL,<br>VYQHQAAMKPWIQPKTK<br>VIPYVRYL | Antimicrobial  |
|  | AM(+15.99)KPWIQPKTKVI<br>PYVRY,<br>AMKPWIQPKTKVIPYVRY                   | Antimicrobial  |
|  | ALNEINQF                                                                | Antimicrobial  |
|  |                                                                         | ACE-inhibitory |
|  |                                                                         | Antioxidant    |
|  | NM(+15.99)AINPSKE,<br>NMAINPSKE                                         | ACE-inhibitory |
|  | M(+15.99)KPWIQPKTKVIP<br>YV                                             | Antimicrobial  |
|  | IPYVRY                                                                  | Antioxidant    |
|  |                                                                         | Antimicrobial  |
|  |                                                                         | ACE-inhibitory |
|  | ISQRYQKFALPQYLK                                                         | Antimicrobial  |
|  | LNPWDQVKN                                                               | Antimicrobial  |
|  | M(+15.99)KPWIQPKTKVIP<br>YVR,<br>MKPWIQPKTKVIPYVR                       | Antimicrobial  |
|  | KFPQYLQY                                                                | ACE-inhibitory |
|  | LNPWDQVKN                                                               | Antimicrobial  |
|  | TKKTKLTEEEKNRLNF                                                        | Antimicrobial  |
|  | ISQRYQKFALPQYLKTVY<br>QHQA                                              | Antimicrobial  |
|  | PWIQPKTKVIPY                                                            | Antimicrobial  |
|  | SQRYQKFALPQYLKTVYQ<br>HQ                                                | Antimicrobial  |
|  | TKKTKLTEEEKNRLN                                                         | Antimicrobial  |
|  | M(+15.99)KPWIQPK                                                        | ACE-inhibitory |
|  | YQHQAAM(+15.99)KPWIQ<br>PKTKVIPY,<br>YQHQAAMKPWIQPKTKVI<br>PY           | Antimicrobial  |
|  | KPWIQPKTKVIPYV                                                          | Antimicrobial  |
|  | KFALPQY                                                                 | ACE-inhibitory |
|  | IVLNPWDQVKN                                                             | Antimicrobial  |

|                       |      |                                           |                |
|-----------------------|------|-------------------------------------------|----------------|
|                       |      | NAVPITPTLNR                               | Osteoanabolic  |
|                       |      | VLNPWDQV                                  | Antimicrobial  |
|                       |      | IVLNPWDQV                                 | Antimicrobial  |
|                       |      | RNAVPITPTLN                               | Osteoanabolic  |
|                       |      | TVYQHQAAM(+15.99)KP<br>WIQPKTKVIPY        | Antimicrobial  |
|                       |      | QKALNEINQ                                 | Antimicrobial  |
|                       |      |                                           | Antioxidant    |
|                       |      | KTVDMES(+79.97)TEVFTK<br>KTKLTEEEKNRLNFLK | Antimicrobial  |
|                       |      | KISQRYQKFALPQYLKTV<br>YQHQ                | Antimicrobial  |
|                       |      | ALNEINQFY                                 | Antimicrobial  |
|                       |      |                                           | ACE-inhibitory |
|                       |      |                                           | Antioxidant    |
|                       |      | FYQKFPQYL                                 | ACE-inhibitory |
|                       |      | QKALNEINQFY                               | Antimicrobial  |
|                       |      |                                           | ACE-inhibitory |
|                       |      |                                           | Antioxidant    |
|                       |      | FPQYLQY                                   | ACE-inhibitory |
|                       |      | TVYQHQAAM(+15.99)KP<br>WIQPKTKVIPYVRYL    | Antimicrobial  |
|                       |      | YQKFPQYLQY                                | ACE-inhibitory |
|                       |      | QKAM(+15.99)KPWIQPK                       | ACE-inhibitory |
|                       |      | KFALPQYLKT                                | Antioxidant    |
|                       |      |                                           | ACE-inhibitory |
|                       |      | QKFPQYLQY                                 | ACE-inhibitory |
|                       |      | QPKTKVIPYVRY                              | Antimicrobial  |
|                       |      | VYQHQAAM(+15.99)KPWI<br>QPKTKVIPYVRY      | Antimicrobial  |
|                       |      | IQPKTKVIPY                                | Antimicrobial  |
|                       |      | ISQRYQKFALPQYLKT                          | Antimicrobial  |
|                       |      | QKFPQY                                    | Antioxidant    |
|                       |      |                                           | ACE-inhibitory |
|                       |      | KAM(+15.99)KPWIQPK                        | ACE-inhibitory |
|                       |      | QKFPQYL                                   | Antioxidant    |
|                       |      |                                           | ACE-inhibitory |
|                       |      | NEINQFYQK                                 | ACE-inhibitory |
| P02666;A0A452<br>DHW7 | CSN2 |                                           | Cytomodulatory |
|                       |      | EPVLPVVRGPF                               | Antimicrobial  |
|                       |      |                                           | ACE-inhibitory |
|                       |      | GPVVRGPF                                  | ACE-inhibitory |
|                       |      | EPVLPVVR                                  | Cytomodulatory |

|  |  |                                                                                                  |                           |
|--|--|--------------------------------------------------------------------------------------------------|---------------------------|
|  |  |                                                                                                  | ACE-inhibitory            |
|  |  |                                                                                                  | Immunomodulatory          |
|  |  |                                                                                                  | Antithrombotic            |
|  |  |                                                                                                  | Antioxidant               |
|  |  |                                                                                                  | Anti-inflammatory         |
|  |  | VPYPQRDM(+15.99)PIQA,<br>VPYPQRDMPIQA                                                            | Antimicrobial             |
|  |  | KIEKFQSEEQQQTEDELQD<br>K,<br>KIEKFQS(+79.97)EEQQQT<br>EDELQDK                                    | Promote calcium<br>uptake |
|  |  | GPVRGPFPIIV                                                                                      | ACE-inhibitory            |
|  |  | EPVLGPVRGPFPIIV                                                                                  | immunomodulatory          |
|  |  |                                                                                                  | antithrombin              |
|  |  |                                                                                                  | Antimicrobial             |
|  |  |                                                                                                  | ACE-inhibitory            |
|  |  |                                                                                                  | Antimicrobial             |
|  |  | M(+15.99)PFPKYPVEPFTE<br>SQS,<br>MPFPKYPVEPFTESQS                                                | Antioxidant               |
|  |  | FPKYPVEPFTESQSL,<br>FPKYPVEPFTES(+79.97)QS<br>L                                                  | ACE-inhibitory            |
|  |  | HKEMPFKYPVEPFTESQS<br>L,<br>HKEM(+15.99)PFPKYPVEP<br>FTESQSL,<br>HKEMPFKYPVEPFTESQS<br>(+79.97)L | Antioxidant               |
|  |  | QEPVLGPVRGPFPIIV                                                                                 | immunomodulatory          |
|  |  |                                                                                                  | antithrombin              |
|  |  |                                                                                                  | Antimicrobial             |
|  |  |                                                                                                  | ACE-inhibitory            |
|  |  | VLGPVRGPF                                                                                        | Cytomodulatory            |
|  |  |                                                                                                  | ACE-inhibitory            |
|  |  | HKEM(+15.99)PFP,<br>HKEMPFP                                                                      | Antimicrobial             |
|  |  | VKEAM(+15.99)APKH,<br>VKEAMAPKH                                                                  | Antioxidant               |
|  |  |                                                                                                  | Antimicrobial             |
|  |  | VPYPQRD                                                                                          | Antioxidant               |
|  |  |                                                                                                  | Antimicrobial             |
|  |  |                                                                                                  | ACE-inhibitory            |
|  |  | YPFPGPIP                                                                                         | prolyl                    |

|  |  |                                                                     |                                      |
|--|--|---------------------------------------------------------------------|--------------------------------------|
|  |  |                                                                     | endopeptidase-inhibitory             |
|  |  |                                                                     | PEP-inhibitory                       |
|  |  |                                                                     | DPP-IV Inhibitory                    |
|  |  |                                                                     | ACE-inhibitory                       |
|  |  |                                                                     | Antioxidant                          |
|  |  |                                                                     | anti-anxiety                         |
|  |  | VLPVPQK                                                             | Antioxidant                          |
|  |  |                                                                     | Antimicrobial                        |
|  |  |                                                                     | ACE-inhibitory                       |
|  |  |                                                                     | Wound healing                        |
|  |  |                                                                     | Osteoanabolic                        |
|  |  |                                                                     | anti-apoptotic effect                |
|  |  |                                                                     | Anti-inflammatory                    |
|  |  |                                                                     | Inhibition of cholesterol solubility |
|  |  | EPVLPVVRGPFPI                                                       | Antimicrobial                        |
|  |  |                                                                     | ACE-inhibitory                       |
|  |  | GPVRGPFPII                                                          | ACE-inhibitory                       |
|  |  | FPKYPVEPFOTESQS                                                     | ACE-inhibitory                       |
|  |  | HKEM(+15.99)PFPKYPVEPFTESQSLT,<br>HKEMPFPKYPVEPFTESQSLT             | Antioxidant                          |
|  |  | RGPFPIIV                                                            | ACE-inhibitory                       |
|  |  | KIEKFQS(+79.97)EEQQQT<br>EDELQDKIHPFA,<br>KIEKFQSEEQQQTEDELQDKIHPFA | Promote calcium uptake               |
|  |  | IEKFQS(+79.97)EEQQQTE<br>DELQD,<br>IEKFQSEEQQQTEDELQD               | Promote calcium uptake               |
|  |  | EM(+15.99)PFPKYPVEPFTESQ,<br>EMFPKYPVEPFTESQ                        | Antioxidant                          |
|  |  | EPVLPVVRGPFPII                                                      | immunomodulatory                     |
|  |  |                                                                     | antithrombin                         |
|  |  |                                                                     | Antimicrobial                        |
|  |  |                                                                     | ACE-inhibitory                       |
|  |  | YPVEPFTESQSL                                                        | ACE-inhibitory                       |
|  |  | M(+15.99)PFPKYPVEPFTESQSLT,<br>MPFPKYPVEPFTESQSLT                   | Antioxidant                          |

|  |                  |                                                                               |                        |
|--|------------------|-------------------------------------------------------------------------------|------------------------|
|  |                  | QEPVLPVVRGPF                                                                  | Antimicrobial          |
|  |                  |                                                                               | ACE-inhibitory         |
|  |                  | KEM(+15.99)PFPKYPVEPFTESQSL,<br>KEMPFKYPVEPFTESQSL                            | Antioxidant            |
|  |                  | KIEKFQS(+79.97)EEQQQT<br>EDELQDKIHPF,<br>KIEKFQSEEQQQTEDELQDKIHPF             | Promote calcium uptake |
|  |                  | SQSKVLPVPQKAVPYPQR<br>DMP,<br>SQSKVLPVPQKAVPYPQR<br>DM(+15.99)P               | Antioxidant            |
|  |                  | FQSEEQQQTEDELQDK,<br>FQS(+79.97)EEQQQTEDELQDK                                 | Promote calcium uptake |
|  |                  | HKEM(+15.99)PFPKYPVEPFTESQ,<br>HKEMPFKYPVEPFTESQ                              | Antioxidant            |
|  |                  | SKVKEAM(+15.99)APKH,<br>SKVKEAMAPKH                                           | Antimicrobial          |
|  |                  | MPFPKYPVEPFTESQSL,<br>M(+15.99)PFPKYPVEPFTESQSL,<br>MPFPKYPVEPFT(+79.97)ESQSL | Antioxidant            |
|  |                  | SKVKEAMAPK,<br>SKVKEAM(+15.99)APK                                             | Antioxidant            |
|  |                  |                                                                               | Antimicrobial          |
|  |                  | VKEAMAPK,<br>VKEAM(+15.99)APK                                                 | Antioxidant            |
|  |                  |                                                                               | Antimicrobial          |
|  |                  | FQSEEQQQTEDELQDKIHP<br>FAQT,<br>FQS(+79.97)EEQQQTEDELQDKIHPFAQT               | Promote calcium uptake |
|  |                  | M(+15.99)PFPKYPVEPFTESQ,<br>MPFPKYPVEPFTESQ                                   | Antioxidant            |
|  |                  | KEAMAPKH,<br>KEAM(+15.99)APKH                                                 | Antioxidant            |
|  |                  |                                                                               | Antimicrobial          |
|  |                  | EM(+15.99)PFPKYPVEPFTESQS,<br>EMPFKYPVEPFTESQS                                | Antioxidant            |
|  |                  |                                                                               | Cytomodulatory         |
|  |                  |                                                                               | ACE-inhibitory         |
|  | Immunomodulatory |                                                                               |                        |

|  |  |                                                                                                                                      |                                                                                                                                                 |
|--|--|--------------------------------------------------------------------------------------------------------------------------------------|-------------------------------------------------------------------------------------------------------------------------------------------------|
|  |  |                                                                                                                                      | Antithrombotic                                                                                                                                  |
|  |  |                                                                                                                                      | Antioxidant                                                                                                                                     |
|  |  |                                                                                                                                      | Anti-inflammatory                                                                                                                               |
|  |  | KFQS(+79.97)EEQQQTEDE<br>LQDK,<br>KFQSEEQQQTEDELQDK                                                                                  | Promote calcium uptake                                                                                                                          |
|  |  | FQSEEQQQTEDELQDKIHP<br>FAQTQS,<br>FQS(+79.97)EEQQQTEDEL<br>QDKIHPFAQTQS                                                              | Promote calcium uptake                                                                                                                          |
|  |  | EAMAPKHK,<br>EAM(+15.99)APKHK                                                                                                        | Antimicrobial                                                                                                                                   |
|  |  | SKVKEAM(+15.99)APKHK<br>EMPFKYPVEPFTESQ,<br>SKVKEAM(+15.99)APKHK<br>EM(+15.99)PFPKYPVEPFT<br>ESQ,<br>SKVKEAMAPKHKEMPF<br>KYPVEPFTESQ | protective effects<br>in<br>indomethacin-induced<br>enteritis through<br>preservation of<br>goblet cells and<br>improvement in<br>wound healing |
|  |  |                                                                                                                                      | Opioid                                                                                                                                          |
|  |  |                                                                                                                                      | increases mMuc4<br>expression                                                                                                                   |
|  |  |                                                                                                                                      | increase small<br>intestinal goblet<br>cell density                                                                                             |
|  |  |                                                                                                                                      | Increase MUC2<br>expression                                                                                                                     |
|  |  | PVRGPFPIIV                                                                                                                           | ACE-inhibitory                                                                                                                                  |
|  |  | MPFPKYPVEP,<br>M(+15.99)PFPKYPVEP                                                                                                    | ACE-inhibitory                                                                                                                                  |
|  |  |                                                                                                                                      | Antioxidant                                                                                                                                     |
|  |  | FQS(+79.97)EEQQQTEDEL<br>QDKIHPF,<br>FQSEEQQQTEDELQDKIHP<br>F                                                                        | Promote calcium uptake                                                                                                                          |
|  |  | LPPTVMFPPQSVL,<br>LPPTVM(+15.99)FPPQSVL                                                                                              | DPP-IV Inhibitory                                                                                                                               |
|  |  | HPFAQTQ                                                                                                                              | prolyl<br>endopeptidase-inhibito<br>ry                                                                                                          |
|  |  |                                                                                                                                      | PEP-inhibitory                                                                                                                                  |
|  |  | HKEM(+15.99)PFPKYPVEP<br>FTESQS,<br>HKEMPFKYPVEPFTESQS                                                                               | Antioxidant                                                                                                                                     |



|  |  |                                                                                                                                              |                                                                                                                            |
|--|--|----------------------------------------------------------------------------------------------------------------------------------------------|----------------------------------------------------------------------------------------------------------------------------|
|  |  | KFQSEEQQTTEDELQDKI<br>HPFAQTQ,<br>KFQS(+79.97)EEQQQTEDE<br>LQDKIHPFAQTQ                                                                      | Promote calcium uptake                                                                                                     |
|  |  | EM(+15.99)PFPK                                                                                                                               | Increase MUC4 expression                                                                                                   |
|  |  |                                                                                                                                              | Bradykinin-Potentiating                                                                                                    |
|  |  |                                                                                                                                              | Antimicrobial                                                                                                              |
|  |  |                                                                                                                                              | ACE-inhibitory                                                                                                             |
|  |  | FQS(+79.97)EEQQQTEDEL<br>QD, FQSEEQQTTEDELQD                                                                                                 | Promote calcium uptake                                                                                                     |
|  |  | VKEAM(+15.99)APKHKEM<br>(+15.99)PFPKYVPEPFTESQ<br>SL,<br>VKEAMAPKHKEM(+15.99)<br>PFPKYVPEPFTESQSL,<br>VKEAMAPKHKEMPFPKY<br>VPEPFTESQSL       | protective effects in indomethacin-induced enteritis through preservation of goblet cells and improvement in wound healing |
|  |  |                                                                                                                                              | Opioid                                                                                                                     |
|  |  |                                                                                                                                              | increases mMuc4 expression                                                                                                 |
|  |  |                                                                                                                                              | increase small intestinal goblet cell density                                                                              |
|  |  |                                                                                                                                              | Increase MUC2 expression                                                                                                   |
|  |  | GVSKVKEAM(+15.99)APK<br>HKEM(+15.99)PFPKYVPEP<br>FTESQ,<br>GVSKVKEAMAPKHKEM(+<br>15.99)PFPKYVPEPFTESQ,<br>GVSKVKEAMAPKHKEMP<br>FPKYVPEPFTESQ | protective effects in indomethacin-induced enteritis through preservation of goblet cells and improvement in wound healing |
|  |  |                                                                                                                                              | Opioid                                                                                                                     |
|  |  |                                                                                                                                              | increases mMuc4 expression                                                                                                 |
|  |  |                                                                                                                                              | increase small intestinal goblet cell density                                                                              |
|  |  |                                                                                                                                              | Increase MUC2 expression                                                                                                   |

|  |                                                                                                                  |                                                                                                                            |
|--|------------------------------------------------------------------------------------------------------------------|----------------------------------------------------------------------------------------------------------------------------|
|  | LTDVENLHLP                                                                                                       | ACE-inhibitory                                                                                                             |
|  | S(+79.97)EEQQQTEDELQDKIHPFAQTQ,<br>SEEQQQTEDELQDKIHPFAQTQ                                                        | Promote calcium uptake                                                                                                     |
|  | EEQQQTEDELQDKIHPFAQTQ                                                                                            | Promote calcium uptake                                                                                                     |
|  | VLGPVRGPFPII                                                                                                     | ACE-inhibitory                                                                                                             |
|  | SKVKEAMAPKHK,<br>SKVKEAM(+15.99)APKHK                                                                            | Antimicrobial                                                                                                              |
|  | SLSQSKVLPVPQKAVPYP                                                                                               | Antioxidant                                                                                                                |
|  | IHPFAQT                                                                                                          | prolyl endopeptidase-inhibitory                                                                                            |
|  |                                                                                                                  | PEP-inhibitory                                                                                                             |
|  | SQSKVLPVPQK                                                                                                      | ACE-inhibitory                                                                                                             |
|  | SLSQSKVLPVPQKAVPYPQR                                                                                             | Antioxidant                                                                                                                |
|  | KEAMAPKHKEMPFKYPVEPFTESQSL,<br>KEAM(+15.99)APKHKEMPFKYPVEPFTESQSL,<br>KEAM(+15.99)APKHKEM(+15.99)PFKYPVEPFTESQSL | protective effects in indomethacin-induced enteritis through preservation of goblet cells and improvement in wound healing |
|  |                                                                                                                  | Opioid                                                                                                                     |
|  |                                                                                                                  | increases mMuc4 expression                                                                                                 |
|  |                                                                                                                  | increase small intestinal goblet cell density                                                                              |
|  |                                                                                                                  | Increase MUC2 expression                                                                                                   |
|  | AVPYPQRD                                                                                                         | Antioxidant                                                                                                                |
|  |                                                                                                                  | Antimicrobial                                                                                                              |
|  |                                                                                                                  | ACE-inhibitory                                                                                                             |
|  | VRGPFPI                                                                                                          | ACE-inhibitory                                                                                                             |
|  | VRGPFPIV                                                                                                         | ACE-inhibitory                                                                                                             |
|  | PVPQKAVPYPQRDM(+15.99)P, PVPQKAVPYPQRDMP                                                                         | Antimicrobial                                                                                                              |
|  | GVSQVKEAM(+15.99)APKHKEMPFKYPVEPFTESQSLT,                                                                        | protective effects in indomethacin-induced                                                                                 |

|                            |                   |                                                                                                                     |                                                                                                                            |
|----------------------------|-------------------|---------------------------------------------------------------------------------------------------------------------|----------------------------------------------------------------------------------------------------------------------------|
|                            |                   | GVSKVKEAM(+15.99)APKHKEM(+15.99)PFPKYVPEPFTESQSLT,<br>GVSKVKEAMAPKHKEMPFPKYVPEPFTESQSLT                             | enteritis through preservation of goblet cells and improvement in wound healing                                            |
|                            |                   |                                                                                                                     | Opioid                                                                                                                     |
|                            |                   |                                                                                                                     | increases mMuc4 expression                                                                                                 |
|                            |                   |                                                                                                                     | increase small intestinal goblet cell density                                                                              |
|                            |                   |                                                                                                                     | Increase MUC2 expression                                                                                                   |
|                            |                   | KEM(+15.99)PFPK, KEMPFPK                                                                                            | Increase MUC4 expression                                                                                                   |
|                            |                   |                                                                                                                     | Bradykinin-Potentiating                                                                                                    |
|                            |                   |                                                                                                                     | Antimicrobial                                                                                                              |
|                            |                   | SKVKEAM(+15.99)APKHKEM(+15.99)PFPKYVPEPFTES,<br>SKVKEAMAPKHKEM(+15.99)PFPKYVPEPFTES,<br>SKVKEAMAPKHKEMPFPKYVPEPFTES | protective effects in indomethacin-induced enteritis through preservation of goblet cells and improvement in wound healing |
|                            |                   |                                                                                                                     | Opioid                                                                                                                     |
|                            |                   |                                                                                                                     | increases mMuc4 expression                                                                                                 |
|                            |                   |                                                                                                                     | increase small intestinal goblet cell density                                                                              |
|                            |                   |                                                                                                                     | Increase MUC2 expression                                                                                                   |
|                            |                   | EM(+15.99)PFPKYVPEPFTESQSL,<br>EMPFPKYVPEPFTESQSL                                                                   | Antioxidant                                                                                                                |
|                            |                   | KVKEAM(+15.99)AP, KVKEAMAP                                                                                          | Antioxidant                                                                                                                |
| Antimicrobial              |                   |                                                                                                                     |                                                                                                                            |
| RELEELN                    | Antioxidant       |                                                                                                                     |                                                                                                                            |
| HKEM(+15.99)PFPK, HKEMPFPK | Antimicrobial     |                                                                                                                     |                                                                                                                            |
| IPPLTQTP                   | DPP-IV Inhibitory |                                                                                                                     |                                                                                                                            |

|  |  |                                                                      |                                 |
|--|--|----------------------------------------------------------------------|---------------------------------|
|  |  |                                                                      | ACE-inhibitory                  |
|  |  | DVENLHLPLP                                                           | ACE-inhibitory                  |
|  |  |                                                                      | Antimicrobial                   |
|  |  | VKEAM(+15.99)APKHK,<br>VKEAMAPKHK                                    | Antioxidant                     |
|  |  |                                                                      | Antimicrobial                   |
|  |  | EKFQSEEQQTEDELQD,<br>EKFQS(+79.97)EEQQQTED<br>ELQD                   | Promote calcium uptake          |
|  |  | QEPVLGPVR                                                            | Cytomodulatory                  |
|  |  |                                                                      | ACE-inhibitory                  |
|  |  |                                                                      | Immunomodulatory                |
|  |  |                                                                      | Antithrombotic                  |
|  |  |                                                                      | Antioxidant                     |
|  |  |                                                                      | Anti-inflammatory               |
|  |  | IEKFQS(+79.97)EEQQQTE<br>DELQDK,<br>IEKFQSEEQQTEDELQDK               | Promote calcium uptake          |
|  |  | SEEQQQTEDELQDK,<br>S(+79.97)EEQQQTEDELQD<br>K                        | Promote calcium uptake          |
|  |  | YPFPGPIPNSLPQNIPP                                                    | ACE-inhibitory                  |
|  |  | FQSEEQQTEDELQDKIHP<br>FAQTQ,<br>FQS(+79.97)EEQQQTEDEL<br>QDKIHPFAQTQ | Promote calcium uptake          |
|  |  | QRDM(+15.99)PIQA,<br>QRDMPIQA                                        | ACE-inhibitory                  |
|  |  | KIEKFQSEEQQTEDELQD<br>KIHP,<br>KIEKFQS(+79.97)EEQQQT<br>EDELQDKIHP   | Promote calcium uptake          |
|  |  | IHPFAQTQ                                                             | prolyl endopeptidase-inhibitory |
|  |  |                                                                      | PEP-inhibitory                  |
|  |  | VPYQRDM(+15.99)PIQAF<br>L, VPYQRDMPIQAFL                             | Antimicrobial                   |
|  |  | EEQQQTEDELQDK                                                        | Promote calcium uptake          |
|  |  | EM(+15.99)PFPKYPVEPFT<br>ES, EMPFPKYPVEPFTES                         | Antioxidant                     |
|  |  | EPVLGPVRGPF                                                          | Cytomodulatory                  |
|  |  |                                                                      | ACE-inhibitory                  |

|  |  |                                                                                                          |                                                                                                                            |
|--|--|----------------------------------------------------------------------------------------------------------|----------------------------------------------------------------------------------------------------------------------------|
|  |  | KEAM(+15.99)APKHKEM(+15.99)PFPKYPVEPFTESQ, KEAM(+15.99)APKHKEMP FPKYPVEPFTESQ, KEAMAPKHKEMPFPKYPVEPFTESQ | protective effects in indomethacin-induced enteritis through preservation of goblet cells and improvement in wound healing |
|  |  |                                                                                                          | Opioid                                                                                                                     |
|  |  |                                                                                                          | increases mMuc4 expression                                                                                                 |
|  |  |                                                                                                          | increase small intestinal goblet cell density                                                                              |
|  |  |                                                                                                          | Increase MUC2 expression                                                                                                   |
|  |  | LEELNVPGEIVES                                                                                            | Antimicrobial                                                                                                              |
|  |  | VPYPQRDM(+15.99)PIQAF, VPYPQRDMPIQAF                                                                     | Antimicrobial                                                                                                              |
|  |  | KAVPYPQRDM(+15.99)PIQ AFL, KAVPYPQRDMPIQAFL                                                              | Antimicrobial                                                                                                              |
|  |  | SSS(+79.97)EESITR, SSSEESITR, SS(+79.97)S(+79.97)EESITR                                                  | Antimicrobial                                                                                                              |
|  |  | GVSKVKEAM(+15.99)APK, GVSKVKEAMAPK                                                                       | Antimicrobial                                                                                                              |
|  |  | YQEPVLGPVRGPFPIIV                                                                                        | immunomodulatory                                                                                                           |
|  |  |                                                                                                          | antithrombin                                                                                                               |
|  |  |                                                                                                          | Antimicrobial                                                                                                              |
|  |  |                                                                                                          | ACE-inhibitory                                                                                                             |
|  |  | AVPYPQRDM(+15.99)PIQAF, AVPYPQRDMPIQAF                                                                   | Antimicrobial                                                                                                              |
|  |  | QEPVLGPVRGPFPII                                                                                          | immunomodulatory                                                                                                           |
|  |  |                                                                                                          | antithrombin                                                                                                               |
|  |  |                                                                                                          | Antimicrobial                                                                                                              |
|  |  |                                                                                                          | ACE-inhibitory                                                                                                             |
|  |  |                                                                                                          | Antimicrobial                                                                                                              |
|  |  | KEAMAPK, KEAM(+15.99)APK                                                                                 | Antioxidant                                                                                                                |
|  |  |                                                                                                          | Antimicrobial                                                                                                              |
|  |  | SEESITRIN, S(+79.97)EESITRIN                                                                             | Antimicrobial                                                                                                              |
|  |  | KVKEAM(+15.99)APK,                                                                                       | Antioxidant                                                                                                                |

|  |  |                                                                                                                                        |                                                                                                                                                                                                                                                                                  |
|--|--|----------------------------------------------------------------------------------------------------------------------------------------|----------------------------------------------------------------------------------------------------------------------------------------------------------------------------------------------------------------------------------------------------------------------------------|
|  |  | KVKEAMAPK                                                                                                                              | Antimicrobial                                                                                                                                                                                                                                                                    |
|  |  | EAMAPKH,<br>EAM(+15.99)APKH                                                                                                            | Antimicrobial                                                                                                                                                                                                                                                                    |
|  |  | KEMPFKYPVEPFOTESQS,<br>KEM(+15.99)PFPKYPVEPF<br>TESQS                                                                                  | Antioxidant                                                                                                                                                                                                                                                                      |
|  |  | GPVRGPFPI                                                                                                                              | ACE-inhibitory                                                                                                                                                                                                                                                                   |
|  |  | LSS(+79.97)S(+79.97)EESIT<br>R, LSSSEESITR,<br>LSS(+79.97)SEESITR                                                                      | Antimicrobial                                                                                                                                                                                                                                                                    |
|  |  | DVENLHLPLLLQ                                                                                                                           | ACE-inhibitory<br>Antimicrobial                                                                                                                                                                                                                                                  |
|  |  | VKEAM(+15.99)APKHKEM<br>(+15.99)PFPKYPVEPFOTESQ<br>S,<br>VKEAM(+15.99)APKHKEM<br>PFPKYPVEPFOTESQS,<br>VKEAMAPKHKEMPFPKY<br>PVEPFOTESQS | protective effects<br>in<br>indomethacin-induced<br>enteritis through<br>preservation of<br>goblet cells and<br>improvement in<br>wound healing<br>Opioid<br>increases mMuc4<br>expression<br>increase small<br>intestinal goblet<br>cell density<br>Increase MUC2<br>expression |
|  |  | FQSEEQQTDELQDKIH,<br>FQS(+79.97)EEQQTDEL<br>QDKIH                                                                                      | Promote calcium<br>uptake                                                                                                                                                                                                                                                        |
|  |  | SLPQNIPPLTQTPVVPPFL<br>QPEVMGV,<br>SLPQNIPPLTQTPVVPPFL<br>QPEVM(+15.99)GV                                                              | ACE-inhibitory                                                                                                                                                                                                                                                                   |
|  |  | EM(+15.99)PFPKYPVEPFT<br>ESQSLT,<br>EMPFPKYPVEPFOTESQSLT                                                                               | Antioxidant                                                                                                                                                                                                                                                                      |
|  |  | GVSKEAM(+15.99)APK<br>HKEM(+15.99)PFPKYPVEP,<br>GVSKEAMAPKHKEM(+<br>15.99)PFPKYPVEP                                                    | protective effects<br>in<br>indomethacin-induced<br>enteritis through<br>preservation of<br>goblet cells and                                                                                                                                                                     |

|  |  |                                                                                                                         |                                                                                                                            |
|--|--|-------------------------------------------------------------------------------------------------------------------------|----------------------------------------------------------------------------------------------------------------------------|
|  |  |                                                                                                                         | improvement in wound healing                                                                                               |
|  |  |                                                                                                                         | Opioid                                                                                                                     |
|  |  |                                                                                                                         | increases mMuc4 expression                                                                                                 |
|  |  |                                                                                                                         | increase small intestinal goblet cell density                                                                              |
|  |  |                                                                                                                         | Increase MUC2 expression                                                                                                   |
|  |  | FQS(+79.97)EEQQQTEDELQDKIHPFA,<br>FQSEEQQTEDELQDKIHPFA                                                                  | Promote calcium uptake                                                                                                     |
|  |  | FPKYPVEP                                                                                                                | ACE-inhibitory                                                                                                             |
|  |  |                                                                                                                         | Antioxidant                                                                                                                |
|  |  | SLSQSKVLPVPQKAVPYPQRD                                                                                                   | Antioxidant                                                                                                                |
|  |  | KEAMAPKHKEM(+15.99)P<br>FPKYPVEPFTESQS,<br>KEAM(+15.99)APKHKEM(+15.99)P<br>FPKYPVEPFTESQS,<br>KEAMAPKHKEMPFKYPVEPFTESQS | protective effects in indomethacin-induced enteritis through preservation of goblet cells and improvement in wound healing |
|  |  |                                                                                                                         | Opioid                                                                                                                     |
|  |  |                                                                                                                         | increases mMuc4 expression                                                                                                 |
|  |  |                                                                                                                         | increase small intestinal goblet cell density                                                                              |
|  |  |                                                                                                                         | Increase MUC2 expression                                                                                                   |
|  |  | SSSEESITRIN,<br>SS(+79.97)SEESITRIN,<br>S(+79.97)SS(+79.97)EESITRIN,<br>S(+79.97)S(+79.97)S(+79.97)EESITRIN             | Antimicrobial                                                                                                              |
|  |  | LPVPQKAVPYPQRDM(+15.99)P,<br>LPVPQKAVPYPQRDMP                                                                           | Antimicrobial                                                                                                              |
|  |  | QSEEQQTEDELQDK,                                                                                                         | Promote calcium                                                                                                            |

|  |                                                                                                                           |                                                                                                              |
|--|---------------------------------------------------------------------------------------------------------------------------|--------------------------------------------------------------------------------------------------------------|
|  | QS(+79.97)EEQQQTEDELQDK                                                                                                   | uptake                                                                                                       |
|  | VRGPFPP                                                                                                                   | ACE-inhibitory                                                                                               |
|  | KIEKFQSEEQQQTEDELQDKIH,<br>KIEKFQS(+79.97)EEQQQT<br>EDELQDKIH                                                             | Promote calcium uptake                                                                                       |
|  | VENLHLPLP                                                                                                                 | ACE-inhibitory<br>Antimicrobial                                                                              |
|  | TLTDVENLHLP                                                                                                               | ACE-inhibitory                                                                                               |
|  | VLPVPQKAVPYPQ                                                                                                             | Antimicrobial                                                                                                |
|  | EVM(+15.99)GVSKVKEAM(+15.99)APK,<br>EVMGVSKVKEAM(+15.99)APK                                                               | Antimicrobial                                                                                                |
|  | AVPYPQRDM(+15.99)PIQA,<br>AVPYPQRDMPIQA                                                                                   | Antimicrobial                                                                                                |
|  | LVYPPFGPIP                                                                                                                | prolyl endopeptidase-inhibitory                                                                              |
|  |                                                                                                                           | PEP-inhibitory                                                                                               |
|  |                                                                                                                           | prolyl endopeptidase-inhibitory                                                                              |
|  |                                                                                                                           | DPP-IV Inhibitory                                                                                            |
|  |                                                                                                                           | ACE-inhibitory                                                                                               |
|  |                                                                                                                           | Antioxidant                                                                                                  |
|  |                                                                                                                           | anti-anxiety                                                                                                 |
|  | TPVVVPPFLQPE                                                                                                              | Antioxidant                                                                                                  |
|  |                                                                                                                           | Antimicrobial                                                                                                |
|  |                                                                                                                           | ACE-inhibitory                                                                                               |
|  | VLGPVRGPFPI                                                                                                               | ACE-inhibitory                                                                                               |
|  | VENLHLPL                                                                                                                  | ACE-inhibitory                                                                                               |
|  | KFQSEEQQQTEDELQD,<br>KFQS(+79.97)EEQQQTEDELQD                                                                             | Promote calcium uptake                                                                                       |
|  | SKVKEAM(+15.99)APKHKEM(+15.99)PFPKYPVEPFTESQS,<br>SKVKEAMAPKHKEMPFPKYPVEPFTESQS,<br>SKVKEAMAPKHKEM(+15.99)PFPKYPVEPFTESQS | protective effects in indomethacin-induced enteritis through preservation of goblet cells and improvement in |



|  |  |                                                                                                                               |                                                                                                                            |
|--|--|-------------------------------------------------------------------------------------------------------------------------------|----------------------------------------------------------------------------------------------------------------------------|
|  |  |                                                                                                                               | wound healing                                                                                                              |
|  |  |                                                                                                                               | Opioid                                                                                                                     |
|  |  |                                                                                                                               | increases mMuc4 expression                                                                                                 |
|  |  |                                                                                                                               | increase small intestinal goblet cell density                                                                              |
|  |  |                                                                                                                               | Increase MUC2 expression                                                                                                   |
|  |  | IEKFQSEEQQTTEDELQDK IH                                                                                                        | Promote calcium uptake                                                                                                     |
|  |  | TPVVVPPFLQPEV                                                                                                                 | Antioxidant                                                                                                                |
|  |  |                                                                                                                               | Antimicrobial                                                                                                              |
|  |  |                                                                                                                               | ACE-inhibitory                                                                                                             |
|  |  | TDVENLHLP                                                                                                                     | ACE-inhibitory                                                                                                             |
|  |  | QEPVLGPVRGP                                                                                                                   | Cytomodulatory                                                                                                             |
|  |  |                                                                                                                               | ACE-inhibitory                                                                                                             |
|  |  |                                                                                                                               | Immunomodulatory                                                                                                           |
|  |  |                                                                                                                               | Antithrombotic                                                                                                             |
|  |  |                                                                                                                               | Antioxidant                                                                                                                |
|  |  |                                                                                                                               | Anti-inflammatory                                                                                                          |
|  |  | IPPLTQTPVVVPPFLQPEV                                                                                                           | ACE-inhibitory                                                                                                             |
|  |  | LGPVRGPFP                                                                                                                     | ACE-inhibitory                                                                                                             |
|  |  | YQEPVLGPVRGPFP                                                                                                                | immunomodulatory                                                                                                           |
|  |  |                                                                                                                               | antithrombin                                                                                                               |
|  |  |                                                                                                                               | Antimicrobial                                                                                                              |
|  |  |                                                                                                                               | ACE-inhibitory                                                                                                             |
|  |  | SQSKVLPVPQ                                                                                                                    | ACE-inhibitory                                                                                                             |
|  |  | SKVKEAM(+15.99)APKHK EMPFPKYPVEPFTESQSLT, SKVKEAM(+15.99)APKHK EM(+15.99)PFPKYPVEPFT ESQSLT, SKVKEAMAPKHKEMPFP KYPVEPFTESQSLT | protective effects in indomethacin-induced enteritis through preservation of goblet cells and improvement in wound healing |
|  |  |                                                                                                                               | Opioid                                                                                                                     |
|  |  |                                                                                                                               | increases mMuc4 expression                                                                                                 |
|  |  |                                                                                                                               | increase small intestinal goblet cell density                                                                              |
|  |  |                                                                                                                               | Increase MUC2                                                                                                              |

|  |  |                                                                                                                                              |                                                                                                                                                 |
|--|--|----------------------------------------------------------------------------------------------------------------------------------------------|-------------------------------------------------------------------------------------------------------------------------------------------------|
|  |  |                                                                                                                                              | expression                                                                                                                                      |
|  |  | QPHQPLPP                                                                                                                                     | ACE-inhibitory                                                                                                                                  |
|  |  | VVPPFLQPE                                                                                                                                    | Antimicrobial                                                                                                                                   |
|  |  | SKVKEAM(+15.99)APKHK<br>EM(+15.99)PFPKYPVEPFT<br>ESQSLTL,<br>SKVKEAM(+15.99)APKHK<br>EMPFPKYPVEPFTESQSLT<br>L                                | protective effects<br>in<br>indomethacin-induced<br>enteritis through<br>preservation of<br>goblet cells and<br>improvement in<br>wound healing |
|  |  |                                                                                                                                              | Opioid                                                                                                                                          |
|  |  |                                                                                                                                              | increases mMuc4<br>expression                                                                                                                   |
|  |  |                                                                                                                                              | increase small<br>intestinal goblet<br>cell density                                                                                             |
|  |  |                                                                                                                                              | Increase MUC2<br>expression                                                                                                                     |
|  |  | RELEELNVPGEIVESLSSSE<br>ESITR,<br>RELEELNVPGEIVESLSS(+<br>79.97)S(+79.97)EESITR                                                              | Caseinophosphopeptid<br>e                                                                                                                       |
|  |  |                                                                                                                                              | Immunomodulatory                                                                                                                                |
|  |  |                                                                                                                                              | promotes calcium<br>uptake                                                                                                                      |
|  |  | VLPVPQKAVPYPQR                                                                                                                               | Antimicrobial                                                                                                                                   |
|  |  | DKIHFAQTQ                                                                                                                                    | prolyl<br>endopeptidase-inhibito<br>ry                                                                                                          |
|  |  |                                                                                                                                              | PEP-inhibitory                                                                                                                                  |
|  |  |                                                                                                                                              | ACE-inhibitory                                                                                                                                  |
|  |  | SKVKEAM(+15.99)APKHK<br>EM(+15.99)PFPKYPVEPFT<br>ESQSL,<br>SKVKEAMAPKHKEM(+15.<br>99)PFPKYPVEPFTESQSL,<br>SKVKEAMAPKHKEMPFP<br>KYPVEPFTESQSL | protective effects<br>in<br>indomethacin-induced<br>enteritis through<br>preservation of<br>goblet cells and<br>improvement in<br>wound healing |
|  |  |                                                                                                                                              | Opioid                                                                                                                                          |
|  |  |                                                                                                                                              | increases mMuc4<br>expression                                                                                                                   |
|  |  |                                                                                                                                              | increase small<br>intestinal goblet<br>cell density                                                                                             |

|  |  |                                                                    |                                                                                                                            |
|--|--|--------------------------------------------------------------------|----------------------------------------------------------------------------------------------------------------------------|
|  |  |                                                                    | Increase MUC2 expression                                                                                                   |
|  |  | IHPFAQTQS                                                          | prolyl endopeptidase-inhibitory                                                                                            |
|  |  |                                                                    | PEP-inhibitory                                                                                                             |
|  |  | FPKYPVEPFTESQSLT                                                   | ACE-inhibitory                                                                                                             |
|  |  | GYSKVKEAM(+15.99)AP, GYSKVKEAMAP                                   | Antimicrobial                                                                                                              |
|  |  | GYSKVKEAM(+15.99)APKH, GYSKVKEAMAPKH                               | Antimicrobial                                                                                                              |
|  |  | GYSKVKEAMAPKHK, GYSKVKEAM(+15.99)APKHK                             | Antimicrobial                                                                                                              |
|  |  | EM(+15.99)PFPKYPVEPF, EMPFPKYPVEPF                                 | ACE-inhibitory                                                                                                             |
|  |  | KEAMAPKHKEM(+15.99)PFPKYPVEPFTESQSLT, KEAMAPKHKEMPFPKYPVEPFTESQSLT | protective effects in indomethacin-induced enteritis through preservation of goblet cells and improvement in wound healing |
|  |  |                                                                    | Opioid                                                                                                                     |
|  |  |                                                                    | increases mMuc4 expression                                                                                                 |
|  |  |                                                                    | increase small intestinal goblet cell density                                                                              |
|  |  |                                                                    | Increase MUC2 expression                                                                                                   |
|  |  | HKEM(+15.99)PFPKYPVEPFTES, HKEMPFPKYPVEPFTES                       | Antioxidant                                                                                                                |
|  |  | VVPPFLQPEVM(+15.99), VVPPFLQPEVM                                   | Antimicrobial                                                                                                              |
|  |  | VYSKVKEAM(+15.99)APK, VYSKVKEAMAPK                                 | Antimicrobial                                                                                                              |
|  |  | FLLYQEPVLPV                                                        | Anti-inflammatory                                                                                                          |
|  |  |                                                                    | ACE-inhibitory                                                                                                             |
|  |  | PQNIPPLTQTPVVVPPF                                                  | ACE-inhibitory                                                                                                             |
|  |  | HPFAQTQS                                                           | prolyl endopeptidase-inhibitory                                                                                            |

|  |  |                                                                                                           |                                                                                                                            |
|--|--|-----------------------------------------------------------------------------------------------------------|----------------------------------------------------------------------------------------------------------------------------|
|  |  |                                                                                                           | ry                                                                                                                         |
|  |  |                                                                                                           | PEP-inhibitory                                                                                                             |
|  |  | LYQEPVLPVVRGPF                                                                                            | immunomodulatory                                                                                                           |
|  |  |                                                                                                           | antithrombin                                                                                                               |
|  |  |                                                                                                           | Antimicrobial                                                                                                              |
|  |  |                                                                                                           | ACE-inhibitory                                                                                                             |
|  |  | EAM(+15.99)APKHKEM(+15.99)PFPKYPVEPFTESQSL, EAMAPKHKEMPFPKYPVEPFTESQSL, EAM(+15.99)APKHKEMPFKYPVEPFTESQSL | protective effects in indomethacin-induced enteritis through preservation of goblet cells and improvement in wound healing |
|  |  |                                                                                                           | Opioid                                                                                                                     |
|  |  |                                                                                                           | increases mMuc4 expression                                                                                                 |
|  |  |                                                                                                           | increase small intestinal goblet cell density                                                                              |
|  |  |                                                                                                           | Increase MUC2 expression                                                                                                   |
|  |  | FPKYPVEPFT                                                                                                | Antioxidant                                                                                                                |
|  |  | LLYQEPVLPV                                                                                                | ACE-inhibitory                                                                                                             |
|  |  |                                                                                                           | Immunomodulatory                                                                                                           |
|  |  |                                                                                                           | Antithrombotic                                                                                                             |
|  |  |                                                                                                           | Antioxidant                                                                                                                |
|  |  |                                                                                                           | Anti-inflammatory                                                                                                          |
|  |  |                                                                                                           | ACE-inhibitory                                                                                                             |
|  |  | SQSKVLPVPQKAVPYPQR D                                                                                      | Antioxidant                                                                                                                |
|  |  | SKVKEAMAPKHKEMPFPKYPVEPF, SKVKEAM(+15.99)APKHKEM(+15.99)PFPKYPVEPF, SKVKEAMAPKHKEM(+15.99)PFPKYPVEPF      | protective effects in indomethacin-induced enteritis through preservation of goblet cells and improvement in wound healing |
|  |  |                                                                                                           | Opioid                                                                                                                     |
|  |  |                                                                                                           | increases mMuc4 expression                                                                                                 |
|  |  |                                                                                                           | increase small                                                                                                             |

|  |  |                                                                            |                                                                                                                            |
|--|--|----------------------------------------------------------------------------|----------------------------------------------------------------------------------------------------------------------------|
|  |  |                                                                            | intestinal goblet cell density                                                                                             |
|  |  |                                                                            | Increase MUC2 expression                                                                                                   |
|  |  | VLSLSQSKVLPVPQKAVP YPQ                                                     | Antioxidant                                                                                                                |
|  |  | KEAM(+15.99)APKHKEM(+15.99)PFPKYVPEPFTES, KEAMAPKHKEM(+15.99)PFPKYVPEPFTES | protective effects in indomethacin-induced enteritis through preservation of goblet cells and improvement in wound healing |
|  |  |                                                                            | Opioid                                                                                                                     |
|  |  |                                                                            | increases mMuc4 expression                                                                                                 |
|  |  |                                                                            | increase small intestinal goblet cell density                                                                              |
|  |  |                                                                            | Increase MUC2 expression                                                                                                   |
|  |  | NIPPLTQTPV                                                                 | ACE-inhibitory                                                                                                             |
|  |  | SQSKVLPVPQKAVPYPQ                                                          | Antioxidant                                                                                                                |
|  |  | YPFPGPIPNSL                                                                | DPP-IV Inhibitory                                                                                                          |
|  |  |                                                                            | ACE-inhibitory                                                                                                             |
|  |  |                                                                            | Antioxidant                                                                                                                |
|  |  |                                                                            | anti-anxiety                                                                                                               |
|  |  | PFPKYVPEPFTESQSL                                                           | ACE-inhibitory                                                                                                             |
|  |  | KEM(+15.99)PFPKYVPEPFTESQ, KEMPFPKYVPEPFTESQ                               | Antioxidant                                                                                                                |
|  |  | IEKFQS(+79.97)EEQQQTE DELQDKIHPFAQ, IEKFQSEEQQTEDELQDK IHPFAQ              | Promote calcium uptake                                                                                                     |
|  |  | SLVYPFPGPIP                                                                | prolyl endopeptidase-inhibitory                                                                                            |
|  |  |                                                                            | PEP-inhibitory                                                                                                             |
|  |  |                                                                            | Antioxidant                                                                                                                |
|  |  |                                                                            | ACE-inhibitory                                                                                                             |
|  |  | FQSEEQQTEDELQDKIHPFAQ,                                                     | Promote calcium uptake                                                                                                     |

|  |                                                                                                                                                        |                                                                                                                                                                                                                                                                                  |
|--|--------------------------------------------------------------------------------------------------------------------------------------------------------|----------------------------------------------------------------------------------------------------------------------------------------------------------------------------------------------------------------------------------------------------------------------------------|
|  | FQS(+79.97)EEQQQTEDEL<br>QDKIHFAQ                                                                                                                      |                                                                                                                                                                                                                                                                                  |
|  | VLGPVRGP                                                                                                                                               | Cytomodulatory<br>ACE-inhibitory                                                                                                                                                                                                                                                 |
|  | LSLSQSKVLPVPQKAVPYP<br>QR                                                                                                                              | Antioxidant                                                                                                                                                                                                                                                                      |
|  | KFQS(+79.97)EEQQQTEDE<br>LQDKIHFP,<br>KFQSEEQQQTEDELQDKI<br>HPF                                                                                        | Promote calcium<br>uptake                                                                                                                                                                                                                                                        |
|  | AVPYPQRDM(+15.99)PIQA<br>FL, AVPYPQRDMPIQAFL                                                                                                           | Antimicrobial                                                                                                                                                                                                                                                                    |
|  | GYSKVKEAM(+15.99)APK<br>HKEM(+15.99)PFPKYVPEP<br>FTESQSL,<br>GYSKVKEAMAPKHKEMP<br>FPKYVPEPFTESQSL,<br>GYSKVKEAMAPKHKEM(+<br>15.99)PFPKYVPEPFTESQS<br>L | protective effects<br>in<br>indomethacin-induced<br>enteritis through<br>preservation of<br>goblet cells and<br>improvement in<br>wound healing<br>Opioid<br>increases mMuc4<br>expression<br>increase small<br>intestinal goblet<br>cell density<br>Increase MUC2<br>expression |
|  | QEPVLGPVRGPFPI                                                                                                                                         | immunomodulatory<br>antithrombin<br>Antimicrobial<br>ACE-inhibitory                                                                                                                                                                                                              |
|  | LSS(+79.97)S(+79.97)EESIT<br>RINK, LSSSEESITRINK,<br>LSSS(+79.97)EESITRINK                                                                             | Antimicrobial                                                                                                                                                                                                                                                                    |
|  | GYSKVKEAMAPKHKEMP<br>FPKYVPEPFTESQS,<br>GYSKVKEAM(+15.99)APK<br>HKEM(+15.99)PFPKYVPEP<br>FTESQS,<br>GYSKVKEAMAPKHKEM(+<br>15.99)PFPKYVPEPFTESQS        | protective effects<br>in<br>indomethacin-induced<br>enteritis through<br>preservation of<br>goblet cells and<br>improvement in<br>wound healing<br>Opioid                                                                                                                        |

|  |  |                                                                                                        |                                               |
|--|--|--------------------------------------------------------------------------------------------------------|-----------------------------------------------|
|  |  |                                                                                                        | increases mMuc4 expression                    |
|  |  |                                                                                                        | increase small intestinal goblet cell density |
|  |  |                                                                                                        | Increase MUC2 expression                      |
|  |  | LSQSKVLPVPQK                                                                                           | ACE-inhibitory                                |
|  |  | QNIPPLTQTPVVVPPFLQPE                                                                                   | ACE-inhibitory                                |
|  |  | EDELQDKIHPF                                                                                            | Antimicrobial                                 |
|  |  | VM(+15.99)GVSKVKEAM(+15.99)APK                                                                         | Antimicrobial                                 |
|  |  | YQEPVLGPVRGPFPI                                                                                        | immunomodulatory                              |
|  |  |                                                                                                        | antithrombin                                  |
|  |  |                                                                                                        | Antimicrobial                                 |
|  |  |                                                                                                        | ACE-inhibitory                                |
|  |  | SEEQQTEDELQDKIHP, S(+79.97)EEQQTEDELQDKIHP                                                             | Promote calcium uptake                        |
|  |  | YQEPVLGPVRGPFPII                                                                                       | immunomodulatory                              |
|  |  |                                                                                                        | antithrombin                                  |
|  |  |                                                                                                        | Antimicrobial                                 |
|  |  |                                                                                                        | ACE-inhibitory                                |
|  |  | VYPFPGIPN                                                                                              | prolyl endopeptidase-inhibitory               |
|  |  |                                                                                                        | PEP-inhibitory                                |
|  |  |                                                                                                        | DPP-IV Inhibitory                             |
|  |  |                                                                                                        | ACE-inhibitory                                |
|  |  |                                                                                                        | Antioxidant                                   |
|  |  |                                                                                                        | anti-anxiety                                  |
|  |  | QSKVLPVPQ                                                                                              | ACE-inhibitory                                |
|  |  | HQPHQPLPPTVMFPPQSV, HQPHQPLPPTVM(+15.99)FPPQSV                                                         | Anti-inflammatory                             |
|  |  |                                                                                                        | ACE-inhibitory                                |
|  |  | SS(+79.97)S(+79.97)EESITRINK, SSS(+79.97)EESITRINK, SSSEESITRINK, S(+79.97)S(+79.97)S(+79.97)EESITRINK | Antimicrobial                                 |
|  |  | FQSEEQQTEDELQDKIHP                                                                                     | Promote calcium                               |

|  |  |                                                                                           |                                                                                                                                                 |
|--|--|-------------------------------------------------------------------------------------------|-------------------------------------------------------------------------------------------------------------------------------------------------|
|  |  | ,<br>FQS(+79.97)EEQQTEDEL<br>QDKIHP                                                       | uptake                                                                                                                                          |
|  |  | S(+79.97)EESITRINK,<br>SEESITRINK                                                         | Antimicrobial                                                                                                                                   |
|  |  | VKEAM(+15.99)APKHKEM<br>(+15.99)PFPKY PVEPFTESQ                                           | protective effects<br>in<br>indomethacin-induced<br>enteritis through<br>preservation of<br>goblet cells and<br>improvement in<br>wound healing |
|  |  | ,<br>VKEAMAPKHKEM PFPKY<br>PVEPFTESQ,<br>VKEAMAPKHKEM(+15.99)<br>PFPKY PVEPFTESQ          | Opioid                                                                                                                                          |
|  |  |                                                                                           | increases mMuc4<br>expression                                                                                                                   |
|  |  |                                                                                           | increase small<br>intestinal goblet<br>cell density                                                                                             |
|  |  |                                                                                           | Increase MUC2<br>expression                                                                                                                     |
|  |  | VKEAM(+15.99)APKHKEM<br>PFPKY PVEPFTESQSLT,<br>VKEAMAPKHKEM PFPKY<br>PVEPFTESQSLT         | protective effects<br>in<br>indomethacin-induced<br>enteritis through<br>preservation of<br>goblet cells and<br>improvement in<br>wound healing |
|  |  |                                                                                           | Opioid                                                                                                                                          |
|  |  |                                                                                           | increases mMuc4<br>expression                                                                                                                   |
|  |  |                                                                                           | increase small<br>intestinal goblet<br>cell density                                                                                             |
|  |  |                                                                                           | Increase MUC2<br>expression                                                                                                                     |
|  |  | SLSQSKVLPVPQ                                                                              | ACE-inhibitory                                                                                                                                  |
|  |  | SLPQNIPPLTQTPVVPPFL<br>QPEVM(+15.99)GVSKVKE<br>A,<br>SLPQNIPPLTQTPVVPPFL<br>QPEVMGVSKVKEA | ACE-inhibitory                                                                                                                                  |
|  |  | QDKIHPF                                                                                   | ACE-inhibitory                                                                                                                                  |



|  |  |                                                                                                    |                                 |
|--|--|----------------------------------------------------------------------------------------------------|---------------------------------|
|  |  | FPKYPVEPFT                                                                                         | ACE-inhibitory                  |
|  |  |                                                                                                    | Antioxidant                     |
|  |  | VLPVPQKAVPYP                                                                                       | Antimicrobial                   |
|  |  | RELEELNVPGEIVESLS(+79.97)S(+79.97)SEESITRINK, RELEELNVPGEIVES(+79.97)LS(+79.97)SS(+79.97)EESITRINK | Caseinophosphopeptide           |
|  |  |                                                                                                    | Immunomodulatory                |
|  |  |                                                                                                    | promotes calcium uptake         |
|  |  | LGPVRGPF                                                                                           | ACE-inhibitory                  |
|  |  | LEELNVPGEIVE                                                                                       | Antimicrobial                   |
|  |  | IEKFQS(+79.97)EEQQQTEDELQ, IEKFQSEEQQQTEDELQ                                                       | Promote calcium uptake          |
|  |  | SLVYPPFGPIP                                                                                        | Antioxidant                     |
|  |  |                                                                                                    | ACE-inhibitory                  |
|  |  | SKVLPVPQ                                                                                           | Antioxidant                     |
|  |  |                                                                                                    | Anti-inflammatory               |
|  |  |                                                                                                    | ACE-inhibitory                  |
|  |  | IHPFAQTQSL                                                                                         | prolyl endopeptidase-inhibitory |
|  |  |                                                                                                    | PEP-inhibitory                  |
|  |  | M(+15.99)PFPKYPVEPF, MPFPKYPVEPF                                                                   | ACE-inhibitory                  |
|  |  |                                                                                                    | Antioxidant                     |
|  |  | KVLPVPQKA                                                                                          | Antioxidant                     |
|  |  |                                                                                                    | Anti-inflammatory               |
|  |  | EELNVPGEIVES                                                                                       | Antimicrobial                   |
|  |  | YPVEPFTESQSLT                                                                                      | ACE-inhibitory                  |
|  |  | LSSSEESITRIN, LSSS(+79.97)EESITRIN, LS(+79.97)SS(+79.97)EESITRIN                                   | Antimicrobial                   |
|  |  | IEKFQSEEQQQTEDELQDK IHPFA, IEKFQS(+79.97)EEQQQTEDELQDKIHPFA                                        | Promote calcium uptake          |
|  |  | LTDVENLHLPL                                                                                        | ACE-inhibitory                  |
|  |  |                                                                                                    | Antimicrobial                   |
|  |  | HQPHQPLPPTVM(+15.99)FPPQS, HQPHQPLPPTVMFPPQS                                                       | Anti-inflammatory               |
|  |  |                                                                                                    | ACE-inhibitory                  |
|  |  | GVSKEAM(+15.99)APKHKEM(+15.99)PFPKYPVE,                                                            | protective effects in           |

|                                                    |                                 |                                      |                                                                                                      |
|----------------------------------------------------|---------------------------------|--------------------------------------|------------------------------------------------------------------------------------------------------|
|                                                    |                                 | GYSKVKKEAMAPKHKEM(+15.99)PFPKYPVE    | indomethacin-induced enteritis through preservation of goblet cells and improvement in wound healing |
|                                                    |                                 |                                      | Opioid                                                                                               |
|                                                    |                                 |                                      | increases mMuc4 expression                                                                           |
|                                                    |                                 |                                      | increase small intestinal goblet cell density                                                        |
|                                                    |                                 |                                      | Increase MUC2 expression                                                                             |
|                                                    |                                 | YPQRDM(+15.99)PIQAFL, YPQRDMPIQAFL   | Antimicrobial                                                                                        |
|                                                    |                                 | SLSQSKVLPVPQKAVPYPQ                  | Antioxidant                                                                                          |
|                                                    |                                 | VSKVKEAM(+15.99)APKH, VSKVKEAMAPKH   | Antimicrobial                                                                                        |
|                                                    |                                 | SEEQQQTEDELQD, S(+79.97)EEQQQTEDELQD | Promote calcium uptake                                                                               |
|                                                    |                                 | LVYFPFGPIP                           | prolyl endopeptidase-inhibitory                                                                      |
|                                                    |                                 |                                      | PEP-inhibitory                                                                                       |
|                                                    |                                 |                                      | DPP-IV Inhibitory                                                                                    |
|                                                    |                                 |                                      | ACE-inhibitory                                                                                       |
|                                                    |                                 |                                      | Antioxidant                                                                                          |
|                                                    |                                 |                                      | anti-anxiety                                                                                         |
| FQS(+79.97)EEQQQTEDELQ, FQSEEQQQTEDELQ             | Promote calcium uptake          |                                      |                                                                                                      |
| SQSKVLPVPQKAVPYPQRDM, SQSKVLPVPQKAVPYPQRDM(+15.99) | Antioxidant                     |                                      |                                                                                                      |
| KIHPFAQTQ                                          | prolyl endopeptidase-inhibitory |                                      |                                                                                                      |
|                                                    | PEP-inhibitory                  |                                      |                                                                                                      |
|                                                    | ACE-inhibitory                  |                                      |                                                                                                      |
| TPVVVPPFLQPEVM(+15.99), TPVVVPPFLQPEVM             | Antioxidant                     |                                      |                                                                                                      |
| LSLSQSKVLPVPQKAVPYP                                | Antioxidant                     |                                      |                                                                                                      |

|  |                                                                   |                        |
|--|-------------------------------------------------------------------|------------------------|
|  | Q                                                                 |                        |
|  | SEEQQTEDELQDKIHPFA<br>Q,<br>S(+79.97)EEQQTEDELQD<br>KIHPFAQ       | Promote calcium uptake |
|  | SQSKVLPVPQKA                                                      | ACE-inhibitory         |
|  | YQEPVLPVVRGPF                                                     | Antimicrobial          |
|  |                                                                   | ACE-inhibitory         |
|  | QSEEQQTEDELQDKIHPF<br>,<br>QS(+79.97)EEQQTEDELQ<br>DKIHPF         | Promote calcium uptake |
|  | IEKFQS(+79.97)EEQQTE<br>DEL,<br>IEKFQSEEQQTEDEL                   | Promote calcium uptake |
|  | IEKFQSEEQQTEDELQDK<br>IHPF,<br>IEKFQS(+79.97)EEQQTE<br>DELQDKIHPF | Promote calcium uptake |
|  | KEM(+15.99)PFPKYPVEPF<br>TESQSLT,<br>KEMPFKYPVEPFTESQSL<br>T      | Antioxidant            |
|  | EQQTEDELQDKIHPFAQ<br>TQ                                           | Promote calcium uptake |
|  | KFQS(+79.97)EEQQTEDE<br>LQDKIHPFA,<br>KFQSEEQQTEDELQDKI<br>HPFA   | Promote calcium uptake |
|  | S(+79.97)SEESITRIN,<br>S(+79.97)S(+79.97)EESITRI<br>N             | Antimicrobial          |
|  | QDKIHPFAQTQSLVYPPFG<br>PIP                                        | ACE-inhibitory         |
|  | S(+79.97)S(+79.97)EESITRI<br>NK, SSEESITRINK                      | Antimicrobial          |
|  | QNIPPLTQTPVVVPPF                                                  | ACE-inhibitory         |
|  | QEPVLPVVRGPF                                                      | Cytomodulatory         |
|  |                                                                   | Antimicrobial          |
|  |                                                                   | ACE-inhibitory         |
|  | VSKVKEAM(+15.99)APKH<br>K, VSKVKEAMAPKHK                          | Antimicrobial          |
|  | SQSKVLPVPQKAVPYPQR                                                | Antioxidant            |
|  | LLYQEPVLPVVRGP                                                    | Antimicrobial          |

|  |  |                                                                                                                       |                                                                                                                                                 |
|--|--|-----------------------------------------------------------------------------------------------------------------------|-------------------------------------------------------------------------------------------------------------------------------------------------|
|  |  |                                                                                                                       | ACE-inhibitory                                                                                                                                  |
|  |  | LLYQEPVLPVVRGPFPI                                                                                                     | immunomodulatory                                                                                                                                |
|  |  |                                                                                                                       | antithrombin                                                                                                                                    |
|  |  |                                                                                                                       | Antimicrobial                                                                                                                                   |
|  |  |                                                                                                                       | ACE-inhibitory                                                                                                                                  |
|  |  | LPPTVMFPPQSV,<br>LPPTVM(+15.99)FPPQSV                                                                                 | DPP-IV Inhibitory                                                                                                                               |
|  |  | KAVPYPQRDM(+15.99)PIQ<br>A, KAVPYPQRDMPIQA                                                                            | Antimicrobial                                                                                                                                   |
|  |  | GYSKVKEAM(+15.99)APK<br>HKE                                                                                           | Antimicrobial                                                                                                                                   |
|  |  | VSKVKEAM(+15.99)APKH<br>KEM(+15.99)PFPKYPVEP,<br>VSKVKEAMAPKHKEMPF<br>PKYPVEP,<br>VSKVKEAM(+15.99)APKH<br>KEMPFKYPVEP | protective effects<br>in<br>indomethacin-induced<br>enteritis through<br>preservation of<br>goblet cells and<br>improvement in<br>wound healing |
|  |  |                                                                                                                       | Opioid                                                                                                                                          |
|  |  |                                                                                                                       | increases mMuc4<br>expression                                                                                                                   |
|  |  |                                                                                                                       | increase small<br>intestinal goblet<br>cell density                                                                                             |
|  |  |                                                                                                                       | Increase MUC2<br>expression                                                                                                                     |
|  |  | SLSQSKVLPVP                                                                                                           | ACE-inhibitory                                                                                                                                  |
|  |  | PQNIPPLTQTPVVPPFLQ<br>PE                                                                                              | ACE-inhibitory                                                                                                                                  |
|  |  | SLPQNIPPLTQTPVVPPFL<br>QPEVMGVSKV,<br>SLPQNIPPLTQTPVVPPFL<br>QPEVM(+15.99)GVSKV                                       | ACE-inhibitory                                                                                                                                  |
|  |  | SLPQNIPPLTQTPVVPPFL<br>QPEVM(+15.99)GVSK                                                                              | ACE-inhibitory                                                                                                                                  |
|  |  | SLPQNIPPLTQTPVVPPFL<br>QPEVM(+15.99)GVSKVKE,<br>SLPQNIPPLTQTPVVPPFL<br>QPEVMGVSKVKE                                   | ACE-inhibitory                                                                                                                                  |
|  |  | LSSLQSKVLPVPQKAVPYP<br>EVM(+15.99)GVSKVKEAM<br>(+15.99)APKH,<br>EVMGVSKVKEAM(+15.99)                                  | Antioxidant                                                                                                                                     |
|  |  |                                                                                                                       | Antimicrobial                                                                                                                                   |

|  |                                                                  |                        |
|--|------------------------------------------------------------------|------------------------|
|  | APKH,<br>EVMGVSKVKEAMAPKH                                        |                        |
|  | VLPVPQKA                                                         | Antioxidant            |
|  |                                                                  | Antimicrobial          |
|  |                                                                  | ACE-inhibitory         |
|  |                                                                  | Wound healing          |
|  |                                                                  | Osteoanabolic          |
|  |                                                                  | anti-apoptotic effect  |
|  |                                                                  | Anti-inflammatory      |
|  | YQEPVLGPVRGP                                                     | Cytomodulatory         |
|  |                                                                  | Antimicrobial          |
|  |                                                                  | ACE-inhibitory         |
|  |                                                                  | Immunomodulatory       |
|  |                                                                  | Antithrombotic         |
|  |                                                                  | Antioxidant            |
|  |                                                                  | Anti-inflammatory      |
|  | M(+15.99)PFPKYPV,<br>MPFPKYPV                                    | ACE-inhibitory         |
|  | LYQEPVLGPVR                                                      | ACE-inhibitory         |
|  |                                                                  | Immunomodulatory       |
|  |                                                                  | Antithrombotic         |
|  |                                                                  | Antioxidant            |
|  |                                                                  | Anti-inflammatory      |
|  | FLLYQEPVLGPVRGP                                                  | Antimicrobial          |
|  |                                                                  | ACE-inhibitory         |
|  | LLYQEPVLGPVRGPF                                                  | Antimicrobial          |
|  |                                                                  | ACE-inhibitory         |
|  | VLGPVRGPFPIV                                                     | ACE-inhibitory         |
|  | IEKFQS(+79.97)EEQQQTE<br>DELQDKIHP,<br>IEKFQSEEQQTEDELQDK<br>IHP | Promote calcium uptake |
|  | LYQEPVLGPVRGPFPI                                                 | immunomodulatory       |
|  |                                                                  | antithrombin           |
|  |                                                                  | Antimicrobial          |
|  |                                                                  | ACE-inhibitory         |
|  | EKFQSEEQQT(+79.97)ED<br>ELQDKIHPF,<br>EKFQSEEQQTEDELQDKI<br>HPF  | Promote calcium uptake |
|  | IPPLTQTPVVPPFLQPE                                                | ACE-inhibitory         |
|  | VM(+15.99)GVSKVKEAM(+15.99)APKH,                                 | Antimicrobial          |

|  |                                                                                                  |                                                                             |
|--|--------------------------------------------------------------------------------------------------|-----------------------------------------------------------------------------|
|  | VM(+15.99)GVSKVKEAMA<br>PKH                                                                      |                                                                             |
|  | SLS(+79.97)S(+79.97)S(+79.<br>97)EESITRIN,<br>SLSSEESITRIN,<br>SLS(+79.97)SS(+79.97)EESI<br>TRIN | Antimicrobial                                                               |
|  | QKAVPYPQRDM(+15.99)PI<br>QAF                                                                     | Antimicrobial                                                               |
|  | PQNIPPLTQTPVVVPPFLQ<br>PEVM(+15.99)GVSKVKE,<br>PQNIPPLTQTPVVVPPFLQ<br>PEVMGVSKVKE                | ACE-inhibitory                                                              |
|  | KAVPYPQRDM(+15.99)PIQ<br>AF, KAVPYPQRDMPIQAF                                                     | Antimicrobial                                                               |
|  | SLSSEESITR,<br>SLSS(+79.97)SEESITR,<br>SLS(+79.97)S(+79.97)SEESI<br>TR                           | Antimicrobial                                                               |
|  | TDVENLHLPLP                                                                                      | ACE-inhibitory<br>Antimicrobial                                             |
|  | HQPLPPTVM(+15.99)FPPQ<br>SV, HQPLPPTVMFPPQSV                                                     | Anti-inflammatory<br>ACE-inhibitory                                         |
|  | PVLGPVRGPFPIIV                                                                                   | immunomodulatory<br>antithrombin<br>Antimicrobial<br>ACE-inhibitory         |
|  | KYPVEPFTESQSL                                                                                    | ACE-inhibitory                                                              |
|  | FPKYVVEPF                                                                                        | ACE-inhibitory<br>Antioxidant                                               |
|  | RELEELNVPGEIVESLSSSE<br>ES                                                                       | Caseinophosphopeptid<br>e<br>Immunomodulatory<br>promotes calcium<br>uptake |
|  | VENLHLPLPLLQ                                                                                     | ACE-inhibitory<br>Antimicrobial                                             |
|  | KFQSEEQQTEDELQDKI<br>HP,<br>KFQS(+79.97)EEQQQTEDE<br>LQDKIHP                                     | Promote calcium<br>uptake                                                   |
|  | SQSKVLPVP                                                                                        | ACE-inhibitory                                                              |
|  | LYQEPVLGPV                                                                                       | Antioxidant                                                                 |

|  |  |                                                               |                                                                                                                                                 |
|--|--|---------------------------------------------------------------|-------------------------------------------------------------------------------------------------------------------------------------------------|
|  |  |                                                               | ACE-inhibitory                                                                                                                                  |
|  |  |                                                               | Immunomodulatory                                                                                                                                |
|  |  |                                                               | Antithrombotic                                                                                                                                  |
|  |  |                                                               | Anti-inflammatory                                                                                                                               |
|  |  | KHKEM(+15.99)PFPKYPVE<br>PFTESQS,<br>KHKEMPFPKYPVEPFTES<br>QS | Antioxidant                                                                                                                                     |
|  |  | EKFQSEEQQQTEDELQDK,<br>EKFQS(+79.97)EEQQQTED<br>ELQDK         | Promote calcium<br>uptake                                                                                                                       |
|  |  | LYQEPVLGPVRGP                                                 | Antimicrobial                                                                                                                                   |
|  |  |                                                               | ACE-inhibitory                                                                                                                                  |
|  |  |                                                               | Anti-inflammatory                                                                                                                               |
|  |  | EAM(+15.99)APKHKEM(+1<br>5.99)PFPKYPVEPFTESQS                 | protective effects<br>in<br>indomethacin-induced<br>enteritis through<br>preservation of<br>goblet cells and<br>improvement in<br>wound healing |
|  |  |                                                               | Opioid                                                                                                                                          |
|  |  |                                                               | increases mMuc4<br>expression                                                                                                                   |
|  |  |                                                               | increase small<br>intestinal goblet<br>cell density                                                                                             |
|  |  |                                                               | Increase MUC2<br>expression                                                                                                                     |
|  |  | LPVPQKA                                                       | Antioxidant                                                                                                                                     |
|  |  |                                                               | Antimicrobial                                                                                                                                   |
|  |  |                                                               | ACE-inhibitory                                                                                                                                  |
|  |  |                                                               | Wound healing                                                                                                                                   |
|  |  |                                                               | Osteoanabolic                                                                                                                                   |
|  |  |                                                               | anti-apoptotic effect                                                                                                                           |
|  |  | RELEELNV                                                      | Antimicrobial                                                                                                                                   |
|  |  | QPHQPLPPT                                                     | ACE-inhibitory                                                                                                                                  |
|  |  | KVKEAMAPKH,<br>KVKEAM(+15.99)APKH                             | Antioxidant                                                                                                                                     |
|  |  |                                                               | Antimicrobial                                                                                                                                   |
|  |  | VYFPFGPIP                                                     | prolyl<br>endopeptidase-inhibito<br>ry                                                                                                          |

|  |  |                                           |                                 |
|--|--|-------------------------------------------|---------------------------------|
|  |  |                                           | PEP-inhibitory                  |
|  |  |                                           | prolyl endopeptidase-inhibitory |
|  |  |                                           | DPP-IV Inhibitory               |
|  |  |                                           | ACE-inhibitory                  |
|  |  |                                           | Antioxidant                     |
|  |  |                                           | anti-anxiety                    |
|  |  | QS(+79.97)EEQQQTEDELQD, QSEEQQTEDELQD     | Promote calcium uptake          |
|  |  | M(+15.99)PFPKYPVEPFT, MPFPKYPVEPFT        | ACE-inhibitory                  |
|  |  | DELQDKIHPF                                | Antimicrobial                   |
|  |  | SS(+79.97)EESITRI, SSEESITRI              | Antimicrobial                   |
|  |  | LLYQEPVLPVVR                              | ACE-inhibitory                  |
|  |  |                                           | Immunomodulatory                |
|  |  |                                           | Antithrombotic                  |
|  |  |                                           | Antioxidant                     |
|  |  |                                           | Anti-inflammatory               |
|  |  | QEPVLPV                                   | Antioxidant                     |
|  |  |                                           | ACE-inhibitory                  |
|  |  |                                           | Immunomodulatory                |
|  |  |                                           | Antithrombotic                  |
|  |  |                                           | Antioxidant                     |
|  |  |                                           | Anti-inflammatory               |
|  |  | IPPLTQTPV                                 | ACE-inhibitory                  |
|  |  | YFPFGPIPNS                                | prolyl endopeptidase-inhibitory |
|  |  |                                           | PEP-inhibitory                  |
|  |  |                                           | DPP-IV Inhibitory               |
|  |  |                                           | ACE-inhibitory                  |
|  |  |                                           | Antioxidant                     |
|  |  |                                           | anti-anxiety                    |
|  |  |                                           | IPPLTQTPVVV                     |
|  |  | VVPPFLQPEV                                | Antimicrobial                   |
|  |  | PFPKYPVEPFTESQS                           | ACE-inhibitory                  |
|  |  | SQSKVLPVPQKAVPYP                          | Antioxidant                     |
|  |  | EDELQDKIHPFAQTQSLV YFPFGPIPNS             | ACE-inhibitory                  |
|  |  | SKVKEAM(+15.99)APKHKEM(+15.99)PFPKYPVEPFT | protective effects in           |



|                   |                  |                                                                                                          |                                                                                                      |
|-------------------|------------------|----------------------------------------------------------------------------------------------------------|------------------------------------------------------------------------------------------------------|
|                   |                  | E,<br>SKVKEAM(+15.99)APKHK<br>EMPFKYPVEPFTE                                                              | indomethacin-induced enteritis through preservation of goblet cells and improvement in wound healing |
|                   |                  | Opioid                                                                                                   |                                                                                                      |
|                   |                  | increases mMuc4 expression                                                                               |                                                                                                      |
|                   |                  | increase small intestinal goblet cell density                                                            |                                                                                                      |
|                   |                  | Increase MUC2 expression                                                                                 |                                                                                                      |
|                   |                  | MHQPHQPLPPTVMFPPQS<br>V,<br>M(+15.99)HQPHQPLPPTV<br>M(+15.99)FPPQSV,<br>MHQPHQPLPPTVM(+15.99)<br>)FPPQSV | Anti-inflammatory                                                                                    |
|                   |                  |                                                                                                          | ACE-inhibitory                                                                                       |
|                   |                  | YQEPVLPVR                                                                                                | Cytomodulatory                                                                                       |
|                   |                  |                                                                                                          | Antioxidant                                                                                          |
|                   |                  |                                                                                                          | ACE-inhibitory                                                                                       |
|                   |                  |                                                                                                          | Immunomodulatory                                                                                     |
|                   |                  |                                                                                                          | Antithrombotic                                                                                       |
|                   |                  |                                                                                                          | Anti-inflammatory                                                                                    |
|                   |                  | KYPVEPFTEQS                                                                                              | ACE-inhibitory                                                                                       |
|                   |                  | LYQEPVLPVVRGPF                                                                                           | Antimicrobial                                                                                        |
|                   |                  | QKAVPYPQRDM(+15.99)PI<br>QA, QKAVPYPQRDMPIQA                                                             | Antimicrobial                                                                                        |
|                   |                  | S(+79.97)EEQQQTEDELQD<br>KIHPF,<br>SEEQQQTEDELQDKIHPF                                                    | Promote calcium uptake                                                                               |
|                   |                  | NLHLPLLLQ                                                                                                | ACE-inhibitory                                                                                       |
|                   |                  | QSEEQQQTEDELQDKIHP                                                                                       | Promote calcium uptake                                                                               |
|                   |                  | LYQEPVLPVVRGPFPIIV                                                                                       | immunomodulatory                                                                                     |
| antithrombin      |                  |                                                                                                          |                                                                                                      |
| Antimicrobial     |                  |                                                                                                          |                                                                                                      |
|                   | ACE-inhibitory   |                                                                                                          |                                                                                                      |
| LYQEPVLPVVRGPFPII | immunomodulatory |                                                                                                          |                                                                                                      |
|                   | antithrombin     |                                                                                                          |                                                                                                      |
|                   | Antimicrobial    |                                                                                                          |                                                                                                      |

|  |  |                                                                     |                        |
|--|--|---------------------------------------------------------------------|------------------------|
|  |  |                                                                     | ACE-inhibitory         |
|  |  | VPYPQR                                                              | Antioxidant            |
|  |  |                                                                     | DPP-IV Inhibitory      |
|  |  |                                                                     | Antimicrobial          |
|  |  |                                                                     | ACE-inhibitory         |
|  |  | SQSKVLPVPQKAVP                                                      | Antioxidant            |
|  |  | YQEPVLGPV                                                           | Antioxidant            |
|  |  |                                                                     | ACE-inhibitory         |
|  |  |                                                                     | Immunomodulatory       |
|  |  |                                                                     | Antithrombotic         |
|  |  |                                                                     | Antioxidant            |
|  |  |                                                                     | Anti-inflammatory      |
|  |  | SLSQSKVLPVPQKAVP                                                    | Antioxidant            |
|  |  | HKEM(+15.99)PFPKY PVEP<br>FTESQSLTL,<br>HKEM PFPKY PVEPFTESQ<br>LTL | Antioxidant            |
|  |  | EEQQQTEDELQDKIH                                                     | Promote calcium uptake |
|  |  | TQTPVVVPPFLQPE                                                      | Antioxidant            |
|  |  | DVENLHLPLPL                                                         | ACE-inhibitory         |
|  |  |                                                                     | Antimicrobial          |
|  |  | TEDELQDKIHPF                                                        | Antimicrobial          |
|  |  | VRGPFPII                                                            | ACE-inhibitory         |
|  |  | LSQSKVLPVP                                                          | ACE-inhibitory         |
|  |  | HQPHQPLPPT                                                          | Anti-inflammatory      |
|  |  |                                                                     | ACE-inhibitory         |
|  |  | SKVLPVPQK                                                           | Antioxidant            |
|  |  |                                                                     | Anti-inflammatory      |
|  |  |                                                                     | ACE-inhibitory         |
|  |  |                                                                     | ACE-inhibitory         |
|  |  | DKIHPFA                                                             | ACE-inhibitory         |
|  |  | DVENLHLPL                                                           | Antimicrobial          |
|  |  | QTPVVVPPFLQPE                                                       | Antioxidant            |
|  |  |                                                                     | Antimicrobial          |
|  |  |                                                                     | ACE-inhibitory         |
|  |  | KFQS(+79.97)EEQQQTEDE<br>LQDKIHPFAQ,<br>KFQSEEQQTEDELQDKI<br>HPFAQ  | Promote calcium uptake |
|  |  | QRDM(+15.99)PIQAF                                                   | ACE-inhibitory         |
|  |  | EKFQSEEQQTEDELQ                                                     | Promote calcium uptake |

|                                                                       |                        |                                                                                                                    |                                                                                                                                                 |
|-----------------------------------------------------------------------|------------------------|--------------------------------------------------------------------------------------------------------------------|-------------------------------------------------------------------------------------------------------------------------------------------------|
|                                                                       |                        | SKVLPVPQKA                                                                                                         | Antioxidant                                                                                                                                     |
|                                                                       |                        |                                                                                                                    | Anti-inflammatory                                                                                                                               |
|                                                                       |                        |                                                                                                                    | ACE-inhibitory                                                                                                                                  |
|                                                                       |                        | EEQQQTEDELQDKIHP                                                                                                   | Promote calcium uptake                                                                                                                          |
|                                                                       |                        | SLPQNIPPLTQTPVVVPPFL<br>QPEVM(+15.99)GVSKVK,<br>SLPQNIPPLTQTPVVVPPFL<br>QPEVMGVSKVK                                | ACE-inhibitory                                                                                                                                  |
|                                                                       |                        | M(+15.99)APKHKEMPFPK<br>YPVEPFOTESQ,<br>M(+15.99)APKHKEM(+15.9<br>9)PFPKYPVEPFOTESQ,<br>MAPKHKEMPFPKYPVEPF<br>TESQ | Antioxidant                                                                                                                                     |
|                                                                       |                        | YPVEPFOTESQSLTL                                                                                                    | ACE-inhibitory                                                                                                                                  |
|                                                                       |                        | VSKVKEAM(+15.99)APKH<br>KEM(+15.99)PFPKYPVEPF<br>TESQSLT                                                           | protective effects<br>in<br>indomethacin-induced<br>enteritis through<br>preservation of<br>goblet cells and<br>improvement in<br>wound healing |
|                                                                       |                        |                                                                                                                    | Opioid                                                                                                                                          |
|                                                                       |                        |                                                                                                                    | increases mMuc4<br>expression                                                                                                                   |
|                                                                       |                        |                                                                                                                    | increase small<br>intestinal goblet<br>cell density                                                                                             |
|                                                                       |                        |                                                                                                                    | Increase MUC2<br>expression                                                                                                                     |
|                                                                       |                        | QPHQPLPPTVM(+15.99)FP<br>PQSVL,<br>QPHQPLPPTVMFPPQSVL                                                              | Anti-inflammatory                                                                                                                               |
|                                                                       |                        |                                                                                                                    | ACE-inhibitory                                                                                                                                  |
| LPVPQKAVPYPQRD                                                        | Antimicrobial          |                                                                                                                    |                                                                                                                                                 |
| GVSKVKEAM(+15.99)APK<br>HKEM(+15.99),<br>GVSKVKEAMAPKHKEM(+<br>15.99) | Antimicrobial          |                                                                                                                    |                                                                                                                                                 |
| M(+15.99)GVSKVKEAM(+1<br>5.99)APK                                     | Antimicrobial          |                                                                                                                    |                                                                                                                                                 |
| EEQQQTEDELQDKIHPFA<br>Q                                               | Promote calcium uptake |                                                                                                                    |                                                                                                                                                 |

|                      |                    |                                                        |                          |
|----------------------|--------------------|--------------------------------------------------------|--------------------------|
|                      |                    | VLGPVRGPF                                              | Cytomodulatory           |
|                      |                    |                                                        | ACE-inhibitory           |
|                      |                    | VPYPQRDM(+15.99)PIQAFLL, VPYPQRDMPIQAFLL               | Antimicrobial            |
|                      |                    | HKEM(+15.99)PFPKYVPEPFTE, HKEMPFPKYVPEPFTE             | Antioxidant              |
|                      |                    | QSKVLPVPQKA                                            | ACE-inhibitory           |
|                      |                    | ENLHLPLPLLQ                                            | ACE-inhibitory           |
|                      |                    |                                                        | Antimicrobial            |
|                      |                    | VLPVPQKAVPYPQRD                                        | Antimicrobial            |
|                      |                    | PVVVPFLQPEV                                            | Antimicrobial            |
|                      |                    |                                                        | ACE-inhibitory           |
|                      |                    | TDVENLHLPLPL                                           | ACE-inhibitory           |
|                      |                    |                                                        | Antimicrobial            |
|                      |                    | QSKVLPVPQK                                             | Antioxidant              |
|                      |                    |                                                        | Anti-inflammatory        |
|                      |                    |                                                        | ACE-inhibitory           |
|                      |                    | EMFPKYVPEP, EM(+15.99)PFPKYVPEP                        | ACE-inhibitory           |
|                      |                    | VLSLSQSKVLPVPQKAVPYP                                   | Antioxidant              |
|                      |                    | LEELNVPGEIV                                            | Antimicrobial            |
|                      |                    | SLVYFPFGPIPNSLP                                        | ACE-inhibitory           |
|                      |                    | ENLHLPLPLL                                             | ACE-inhibitory           |
|                      |                    |                                                        | Antimicrobial            |
|                      |                    | TLTDVENLHL                                             | ACE-inhibitory           |
|                      |                    | KEM(+15.99)PFPKYVPEPFTES, KEMPFPKYVPEPFTES             | Antioxidant              |
|                      |                    | PQNIPPLTQTPVVPPFL                                      | ACE-inhibitory           |
|                      |                    | APKHKEM(+15.99)PFPKYVPEPFTESQS, APKHKEMPFPKYVPEPFTESQS | Antioxidant              |
|                      |                    | MPFPKY                                                 | Increase MUC4 expression |
|                      |                    |                                                        | Bradykinin-Potentiating  |
|                      |                    |                                                        | Antimicrobial            |
|                      |                    |                                                        | ACE-inhibitory           |
|                      |                    | TEDELQDKIHP                                            | Antimicrobial            |
| GVSKVKEAM(+15.99)APK | protective effects |                                                        |                          |

|                                 |                    |                                                                                                      |                                                                                                         |
|---------------------------------|--------------------|------------------------------------------------------------------------------------------------------|---------------------------------------------------------------------------------------------------------|
|                                 |                    | HKEM(+15.99)PFPKYVPEPFTES,<br>GVSKVKEAM(+15.99)APKHKEMPFKYPVEPFTES,<br>GVSKVKEAMAPKHKEMPFPKYVPEPFTES | in indomethacin-induced enteritis through preservation of goblet cells and improvement in wound healing |
|                                 |                    |                                                                                                      | Opioid                                                                                                  |
|                                 |                    |                                                                                                      | increases mMuc4 expression                                                                              |
|                                 |                    |                                                                                                      | increase small intestinal goblet cell density                                                           |
|                                 |                    |                                                                                                      | Increase MUC2 expression                                                                                |
|                                 |                    | SEEQQQTEDELQDKIH                                                                                     | Promote calcium uptake                                                                                  |
|                                 |                    | TDVENLHLPL                                                                                           | ACE-inhibitory                                                                                          |
|                                 |                    |                                                                                                      | Antimicrobial                                                                                           |
|                                 |                    | EMPFKYPV,<br>EM(+15.99)PFPKYV                                                                        | ACE-inhibitory                                                                                          |
|                                 |                    | VLPVPQKAVPYPQRDMP,<br>VLPVPQKAVPYPQRDM(+15.99)P                                                      | Antimicrobial                                                                                           |
|                                 |                    | SKVLPVPQKAVPYP                                                                                       | Antimicrobial                                                                                           |
|                                 |                    |                                                                                                      | Antioxidant                                                                                             |
|                                 |                    | EPVLPVVRG                                                                                            | Cytomodulatory                                                                                          |
|                                 |                    |                                                                                                      | ACE-inhibitory                                                                                          |
|                                 |                    |                                                                                                      | Immunomodulatory                                                                                        |
|                                 |                    |                                                                                                      | Antithrombotic                                                                                          |
|                                 |                    |                                                                                                      | Antioxidant                                                                                             |
|                                 |                    | EDELQDKIHPFA                                                                                         | Anti-inflammatory                                                                                       |
| LLYQEPVLPVVRGPF                 | Antimicrobial      |                                                                                                      |                                                                                                         |
|                                 | immunomodulatory   |                                                                                                      |                                                                                                         |
|                                 | antithrombin       |                                                                                                      |                                                                                                         |
|                                 | ACE-inhibitory     |                                                                                                      |                                                                                                         |
| HQPHQPLPP                       | ACE-inhibitory     |                                                                                                      |                                                                                                         |
| KEAMAPKHK,<br>KEAM(+15.99)APKHK | Antimicrobial      |                                                                                                      |                                                                                                         |
| KVLPVPQKAV                      | Antioxidant        |                                                                                                      |                                                                                                         |
|                                 | Anti-inflammatory  |                                                                                                      |                                                                                                         |
| SKVKEAM(+15.99)APKHK            | protective effects |                                                                                                      |                                                                                                         |

|                                      |                |                                                                                                         |                                                                                                                           |
|--------------------------------------|----------------|---------------------------------------------------------------------------------------------------------|---------------------------------------------------------------------------------------------------------------------------|
|                                      |                | EM(+15.99)PFPKYPVEPFT<br>ESQSLTLTDV                                                                     | in<br>indomethacin-induced<br>enteritis through<br>preservation of<br>goblet cells and<br>improvement in<br>wound healing |
|                                      |                |                                                                                                         | Opioid                                                                                                                    |
|                                      |                |                                                                                                         | increases mMuc4<br>expression                                                                                             |
|                                      |                |                                                                                                         | increase small<br>intestinal goblet<br>cell density                                                                       |
|                                      |                |                                                                                                         | Increase MUC2<br>expression                                                                                               |
|                                      |                | SLVYFPFGPIPNSLPQN                                                                                       | ACE-inhibitory                                                                                                            |
|                                      |                | EKFQSEEQQQTEDELQDKI<br>HPFAQ                                                                            | Promote calcium<br>uptake                                                                                                 |
|                                      |                | EELNVPGEIVESLSSEESI<br>TR,<br>EELNVPGEIVESLS(+79.97)<br>SSEESITR                                        | Caseinophosphopeptid<br>e<br>Immunomodulatory<br>promotes calcium<br>uptake                                               |
|                                      |                | KFQS(+79.97)EEQQQTEDE<br>L, KfqseeqqqteDEL                                                              | Promote calcium<br>uptake                                                                                                 |
|                                      |                | NLHLPLPLL                                                                                               | ACE-inhibitory                                                                                                            |
|                                      |                | LPVPQKAVPYPQRDM,<br>LPVPQKAVPYPQRDM(+15<br>.99)                                                         | Antimicrobial                                                                                                             |
|                                      |                | EDELQDKIHP                                                                                              | Antimicrobial                                                                                                             |
|                                      |                | WM(+15.99)HQPHQLPPT<br>VMFPPQSV,<br>WMHQPHQLPPTVMFPPQ<br>SV,<br>WM(+15.99)HQPHQLPPT<br>VM(+15.99)FPPQSV | Anti-inflammatory<br><br>ACE-inhibitory                                                                                   |
|                                      |                | LGPVRGPFPII                                                                                             | ACE-inhibitory                                                                                                            |
|                                      |                | QNIPPLTQTPVVVPPFLQP<br>EV                                                                               | ACE-inhibitory                                                                                                            |
| PKYPVEPFTESQSL                       | ACE-inhibitory |                                                                                                         |                                                                                                                           |
| KEM(+15.99)PFPKYPVEP,<br>KEMFPKYPVEP | ACE-inhibitory |                                                                                                         |                                                                                                                           |
| LSQSKVLPVPQ                          | ACE-inhibitory |                                                                                                         |                                                                                                                           |
| SVLSLSQSKVLPVPQ                      | ACE-inhibitory |                                                                                                         |                                                                                                                           |

|  |                                                         |                                                                                                                            |
|--|---------------------------------------------------------|----------------------------------------------------------------------------------------------------------------------------|
|  | LSQSKVLPVPQKAVPYPQR                                     | Antioxidant                                                                                                                |
|  | APKHKEMPFPKYPVEPFTESQ,<br>APKHKEM(+15.99)PFPKYPVEPFTESQ | Antioxidant                                                                                                                |
|  | FQS(+79.97)EEQQQTEDEL                                   | Promote calcium uptake                                                                                                     |
|  | VYPPFGPIPNSL                                            | Antioxidant                                                                                                                |
|  |                                                         | ACE-inhibitory                                                                                                             |
|  |                                                         | anti-anxiety                                                                                                               |
|  | EELNVPGEIVE                                             | ACE-inhibitory                                                                                                             |
|  |                                                         | Antimicrobial                                                                                                              |
|  | VENLHLPLPL                                              | ACE-inhibitory                                                                                                             |
|  |                                                         | Antimicrobial                                                                                                              |
|  | QNIPPLTQTPVVVPPFLQPEVM(+15.99)GV                        | ACE-inhibitory                                                                                                             |
|  | KIHPFAQTQS                                              | prolyl endopeptidase-inhibitory                                                                                            |
|  |                                                         | PEP-inhibitory                                                                                                             |
|  |                                                         | ACE-inhibitory                                                                                                             |
|  | VENLHLPLPLL                                             | ACE-inhibitory                                                                                                             |
|  |                                                         | Antimicrobial                                                                                                              |
|  | LHLPLPLLQ                                               | ACE-inhibitory                                                                                                             |
|  | LSLSQSKVLPVPQKAVP                                       | Antioxidant                                                                                                                |
|  | GVSKVKEAM(+15.99)APKHKEM(+15.99)PFPKYPVEPFTESQSLTL      | protective effects in indomethacin-induced enteritis through preservation of goblet cells and improvement in wound healing |
|  |                                                         | Opioid                                                                                                                     |
|  |                                                         | increases mMuc4 expression                                                                                                 |
|  |                                                         | increase small intestinal goblet cell density                                                                              |
|  |                                                         | Increase MUC2 expression                                                                                                   |
|  | KIHPFAQT                                                | prolyl                                                                                                                     |

|  |  |                                                         |                                                                                                                            |
|--|--|---------------------------------------------------------|----------------------------------------------------------------------------------------------------------------------------|
|  |  |                                                         | endopeptidase-inhibitory                                                                                                   |
|  |  |                                                         | PEP-inhibitory                                                                                                             |
|  |  | IPPLTQTPVVVPPFLQPEVM(+15.99),<br>IPPLTQTPVVVPPFLQPEVM   | ACE-inhibitory                                                                                                             |
|  |  | MAPKHKEMPFPKYPVEPFTES,<br>M(+15.99)APKHKEMPFPKYPVEPFTES | Antioxidant                                                                                                                |
|  |  | TPVVVPPFLQP                                             | Antimicrobial                                                                                                              |
|  |  |                                                         | ACE-inhibitory                                                                                                             |
|  |  | VKEAM(+15.99)APKHKEM(+15.99)PFPKYPVEPFTES               | protective effects in indomethacin-induced enteritis through preservation of goblet cells and improvement in wound healing |
|  |  |                                                         | Opioid                                                                                                                     |
|  |  |                                                         | increases mMuc4 expression                                                                                                 |
|  |  |                                                         | increase small intestinal goblet cell density                                                                              |
|  |  |                                                         | Increase MUC2 expression                                                                                                   |
|  |  | LPVPQKAVPYPQ                                            | Antimicrobial                                                                                                              |
|  |  | PVVVPPFLQPEVM(+15.99)                                   | Antimicrobial                                                                                                              |
|  |  | LSQSKVLPVPQKAVPYPQRD                                    | Antioxidant                                                                                                                |
|  |  | HKEMPFPKYP,<br>HKEM(+15.99)PFPKYP                       | Antimicrobial                                                                                                              |
|  |  | SQSKVLPV                                                | ACE-inhibitory                                                                                                             |
|  |  | SLPQNIPPLTQTPVVVPPFLQPEVM(+15.99)                       | ACE-inhibitory                                                                                                             |
|  |  | LPQNIPPLT                                               | DPP-IV Inhibitory                                                                                                          |
|  |  | PVLGPVRGPFPI                                            | Antimicrobial                                                                                                              |
|  |  |                                                         | ACE-inhibitory                                                                                                             |
|  |  | YPFPGPIPNSLPQNIPPLTQ                                    | ACE-inhibitory                                                                                                             |
|  |  | QSKVLPVPQKAVPYP                                         | Antimicrobial                                                                                                              |



|  |  |                         |                                   |
|--|--|-------------------------|-----------------------------------|
|  |  |                         | Antioxidant                       |
|  |  | VYFPFGPIPNSLP           | ACE-inhibitory                    |
|  |  | YFPFGPIP                | satiety                           |
|  |  |                         | reduces pancreas MDA level        |
|  |  |                         | Opioid                            |
|  |  |                         | Increases MUC5A expression        |
|  |  |                         | Increases MUC3 expression         |
|  |  |                         | Increases MUC2 expression         |
|  |  |                         | Increases jejunal mucus secretion |
|  |  |                         | immunomodulatory                  |
|  |  |                         | Anxiolytic                        |
|  |  |                         | Anticancer                        |
|  |  |                         | ACE-inhibitory                    |
|  |  |                         | Immunomodulatory                  |
|  |  |                         | Antioxidant                       |
|  |  |                         | prolyl endopeptidase-inhibitory   |
|  |  |                         | PEP-inhibitory                    |
|  |  |                         | prolyl endopeptidase-inhibitory   |
|  |  |                         | PEP-inhibitory                    |
|  |  | DPP-IV Inhibitory       |                                   |
|  |  | anti-anxiety            |                                   |
|  |  | KVLPVPQK                | Antioxidant                       |
|  |  |                         | Antimicrobial                     |
|  |  |                         | ACE-inhibitory                    |
|  |  |                         | Wound healing                     |
|  |  |                         | Osteoanabolic                     |
|  |  |                         | anti-apoptotic effect             |
|  |  |                         | Anti-inflammatory                 |
|  |  | FPPQSVLSLSQSKVLPVPQ     | ACE-inhibitory                    |
|  |  | QNIPPLTQTPV             | ACE-inhibitory                    |
|  |  | PFPKYVPEP               | ACE-inhibitory                    |
|  |  |                         | Antioxidant                       |
|  |  | TPVVVPPFLQPEVM(+15.99)G | Antioxidant                       |

|                                                                                                  |                                                                                                                            |                                                     |                                                                                                                            |
|--------------------------------------------------------------------------------------------------|----------------------------------------------------------------------------------------------------------------------------|-----------------------------------------------------|----------------------------------------------------------------------------------------------------------------------------|
|                                                                                                  |                                                                                                                            | QPHQLPPTVM(+15.99)FP<br>PQSV,<br>QPHQLPPTVMFPPQSV   | Anti-inflammatory<br>ACE-inhibitory                                                                                        |
|                                                                                                  |                                                                                                                            | NLHLPLPLLQS                                         | ACE-inhibitory                                                                                                             |
|                                                                                                  |                                                                                                                            | KFQSEEQQTEDELQ,<br>KFQS(+79.97)EEQQTEDE<br>LQ       | Promote calcium uptake                                                                                                     |
|                                                                                                  |                                                                                                                            | LPQNIPPLTQTPVVVPP                                   | ACE-inhibitory                                                                                                             |
|                                                                                                  |                                                                                                                            | DKIHPF                                              | ACE-inhibitory                                                                                                             |
|                                                                                                  |                                                                                                                            | EELNVPGEIVESLS(+79.97)<br>S(+79.97)SEESITRINK       | Caseinophosphopeptide                                                                                                      |
|                                                                                                  |                                                                                                                            |                                                     | Immunomodulatory                                                                                                           |
|                                                                                                  |                                                                                                                            |                                                     | promotes calcium uptake                                                                                                    |
|                                                                                                  |                                                                                                                            | SLVYFPFGPIPNSL                                      | ACE-inhibitory                                                                                                             |
|                                                                                                  |                                                                                                                            | QNIPPLTQTPVVVPPFLQP<br>EVM(+15.99)GVSKVKE           | ACE-inhibitory                                                                                                             |
|                                                                                                  |                                                                                                                            | GVSKVKEAM(+15.99)APK<br>HKEM(+15.99)PFPKYVPEP<br>FT | protective effects in indomethacin-induced enteritis through preservation of goblet cells and improvement in wound healing |
|                                                                                                  |                                                                                                                            |                                                     | Opioid                                                                                                                     |
|                                                                                                  |                                                                                                                            |                                                     | increases mMuc4 expression                                                                                                 |
|                                                                                                  |                                                                                                                            |                                                     | increase small intestinal goblet cell density                                                                              |
|                                                                                                  |                                                                                                                            |                                                     | Increase MUC2 expression                                                                                                   |
|                                                                                                  |                                                                                                                            | LGPVRGPFPI                                          | ACE-inhibitory                                                                                                             |
| PVRGPFPI                                                                                         | ACE-inhibitory                                                                                                             |                                                     |                                                                                                                            |
| GVSKVKEAM(+15.99)APK<br>HKEMPFKYVPEPFTE,<br>GVSKVKEAM(+15.99)APK<br>HKEM(+15.99)PFPKYVPEP<br>FTE | protective effects in indomethacin-induced enteritis through preservation of goblet cells and improvement in wound healing |                                                     |                                                                                                                            |
|                                                                                                  | Opioid                                                                                                                     |                                                     |                                                                                                                            |

|  |  |                                                                  |                                               |
|--|--|------------------------------------------------------------------|-----------------------------------------------|
|  |  |                                                                  | increases mMuc4 expression                    |
|  |  |                                                                  | increase small intestinal goblet cell density |
|  |  |                                                                  | Increase MUC2 expression                      |
|  |  | TEDELQDKIHPFAQT                                                  | Antimicrobial                                 |
|  |  | LLYQEPVLGP                                                       | Antioxidant                                   |
|  |  |                                                                  | ACE-inhibitory                                |
|  |  |                                                                  | Immunomodulatory                              |
|  |  |                                                                  | Antithrombotic                                |
|  |  |                                                                  | Anti-inflammatory                             |
|  |  | FPPQSVLSLSQSKVLPVP                                               | ACE-inhibitory                                |
|  |  | KEMPFPKY,<br>KEM(+15.99)PFPKY                                    | Antimicrobial                                 |
|  |  | LLYQEPVLGPVVRGPFPIIV                                             | immunomodulatory                              |
|  |  |                                                                  | antithrombin                                  |
|  |  |                                                                  | Antimicrobial                                 |
|  |  |                                                                  | ACE-inhibitory                                |
|  |  | SS(+79.97)SEESITRI,<br>SS(+79.97)S(+79.97)EESITRI,<br>SSSEESITRI | Antimicrobial                                 |
|  |  | DVENLHLPLPLL                                                     | ACE-inhibitory                                |
|  |  |                                                                  | Antimicrobial                                 |
|  |  | LSQSKVLPV                                                        | ACE-inhibitory                                |
|  |  | QKAVPYPQRDM(+15.99)PI<br>QAFL,<br>QKAVPYPQRDMPIQAFL              | Antimicrobial                                 |
|  |  | VENLHLPLPLLQS                                                    | ACE-inhibitory                                |
|  |  | ENLHLPLP                                                         | ACE-inhibitory                                |
|  |  | IPPLTQTPVVPPF                                                    | ACE-inhibitory                                |
|  |  | SLPQNIPPLTQTPVVPPFL<br>QPEV                                      | ACE-inhibitory                                |
|  |  | PVPQKAVPYPQRD                                                    | Antimicrobial                                 |
|  |  | ELNVPGEIV                                                        | ACE-inhibitory                                |
|  |  |                                                                  | Antimicrobial                                 |
|  |  | LPQNIPPLTQTPVVPPFL<br>QPEVM(+15.99)GV                            | ACE-inhibitory                                |
|  |  | PVPQKAVPYPQR                                                     | Antimicrobial                                 |
|  |  | LPQNIPPLTQTPVVPPF                                                | ACE-inhibitory                                |
|  |  | EELNVPGEIVESL                                                    | Antimicrobial                                 |
|  |  | QSKVLPVPQKAVPYPQRD                                               | Antioxidant                                   |

|  |                                    |                                                                                                                            |
|--|------------------------------------|----------------------------------------------------------------------------------------------------------------------------|
|  | MP                                 |                                                                                                                            |
|  | SKVLPVPQKAVPYPQ                    | Antimicrobial                                                                                                              |
|  |                                    | Antioxidant                                                                                                                |
|  | LVYFPFGPIPNSL                      | ACE-inhibitory                                                                                                             |
|  | S(+79.97)EEQQQTEDELQDKIHPFA        | Promote calcium uptake                                                                                                     |
|  | SLPQNIPPLTQTPVVVPPFLQPEVM(+15.99)G | ACE-inhibitory                                                                                                             |
|  | HQPHQPLPPTVM(+15.99)FPPQ,          | Anti-inflammatory                                                                                                          |
|  | HQPHQPLPPTVMFPPQ                   | ACE-inhibitory                                                                                                             |
|  | QS(+79.97)EEQQQTEDELQDKIHPFAQTQ,   | Promote calcium uptake                                                                                                     |
|  | QSEEQQTEDELQDKIHPFAQTQ             |                                                                                                                            |
|  | EKFQSEEQQTEDELQDKIHP               | Promote calcium uptake                                                                                                     |
|  | S(+79.97)EEQQQTEDELQDKIHPFAQT      | Promote calcium uptake                                                                                                     |
|  | VEPFTESQSLTL                       | ACE-inhibitory                                                                                                             |
|  | FPKYVVEPFTESQSLTL                  | ACE-inhibitory                                                                                                             |
|  | QPHQPLPPTVM(+15.99)FP              | Anti-inflammatory                                                                                                          |
|  | PQS,                               | ACE-inhibitory                                                                                                             |
|  | QPHQPLPPTVMFPPQS                   |                                                                                                                            |
|  | EELNVPGEIV                         | ACE-inhibitory                                                                                                             |
|  |                                    | Antimicrobial                                                                                                              |
|  | KVLPVPQKAVPYPQ                     | Antimicrobial                                                                                                              |
|  |                                    | Antioxidant                                                                                                                |
|  | EKFQSEEQQTEDELQDKIH                | Promote calcium uptake                                                                                                     |
|  | TDVENLHLPLPLL                      | ACE-inhibitory                                                                                                             |
|  |                                    | Antimicrobial                                                                                                              |
|  | VSKVKEAM(+15.99)APKH               | protective effects in indomethacin-induced enteritis through preservation of goblet cells and improvement in wound healing |
|  | KEMPPKYVVEPFTESQS                  | Opioid                                                                                                                     |
|  |                                    | increases mMuc4 expression                                                                                                 |

|  |  |                                                  |                                               |
|--|--|--------------------------------------------------|-----------------------------------------------|
|  |  |                                                  | increase small intestinal goblet cell density |
|  |  |                                                  | Increase MUC2 expression                      |
|  |  | KAVPYPQRDM(+15.99)PIQ AFL                        | Antimicrobial                                 |
|  |  | SLVYFPFGPIPNSLPQ                                 | ACE-inhibitory                                |
|  |  | EKFQS(+79.97)EEQQQTEDEL, EKFQSEEQQQTEDEL         | Promote calcium uptake                        |
|  |  | PQNIPPLTQTPVVVPPFLQ PEVM(+15.99)                 | ACE-inhibitory                                |
|  |  | QQTEDELQDKIHP                                    | Antimicrobial                                 |
|  |  | TEDELQDKIH                                       | Antimicrobial                                 |
|  |  | YPFPGPIPNSLPQNI                                  | ACE-inhibitory                                |
|  |  | NSLPQNIPPLTQTPVVVPPFLQPEVM(+15.99)GVSKV KE       | ACE-inhibitory                                |
|  |  | VM(+15.99)GVSKVKEAM(+15.99)AP                    | Antimicrobial                                 |
|  |  | PQNIPPLTQTPVVVPPFLQ PEVM(+15.99)G                | ACE-inhibitory                                |
|  |  | QPHQPLPPTV                                       | ACE-inhibitory                                |
|  |  | SLPQNIPPLTQTPVVVPPFLQPEVM(+15.99)GVS             | ACE-inhibitory                                |
|  |  | PVEPFTESQSLTL                                    | ACE-inhibitory                                |
|  |  | QEPVLGPVRG                                       | Cytomodulatory                                |
|  |  |                                                  | ACE-inhibitory                                |
|  |  |                                                  | Immunomodulatory                              |
|  |  |                                                  | Antithrombotic                                |
|  |  |                                                  | Antioxidant                                   |
|  |  | QTPVVVPPFLQPEVM(+15.99)                          | Anti-inflammatory                             |
|  |  | PVVVPPFLQPE                                      | Antioxidant                                   |
|  |  |                                                  | Antimicrobial                                 |
|  |  | KFQS(+79.97)EEQQQTEDELQDKIH, KfqseeqqqteDELQDKIH | ACE-inhibitory                                |
|  |  | KVLVPVQKAVPYPQR                                  | Promote calcium uptake                        |
|  |  |                                                  | Antimicrobial                                 |
|  |  | SWMHQPHQPLPPTVM(+15                              | Antioxidant                                   |
|  |  |                                                  | Anti-inflammatory                             |

|  |                                                                                     |                                                                          |
|--|-------------------------------------------------------------------------------------|--------------------------------------------------------------------------|
|  | .99)FPPQS,<br>SWM(+15.99)HQPHQPLPPT<br>VM(+15.99)FPPQS,<br>SWMHQPHQPLPPTVMFPP<br>QS | ACE-inhibitory                                                           |
|  | QSEEQQTTEDELQDKIH                                                                   | Promote calcium uptake                                                   |
|  | WM(+15.99)HQPHQPLPPT<br>VM(+15.99)FPPQS,<br>WMHQPHQPLPPTVM(+15.<br>99)FPPQS         | Anti-inflammatory<br>ACE-inhibitory                                      |
|  | TEDELQDKIHPFAQ                                                                      | Antimicrobial                                                            |
|  | PQNIPPLTQTPVVPPFLQ<br>PEVMGVSKVKEA                                                  | ACE-inhibitory                                                           |
|  | KHKEMPFKYPVEPFTES<br>QSL                                                            | Antioxidant                                                              |
|  | ENLHLPLLLQS                                                                         | ACE-inhibitory                                                           |
|  | IPPLTQTPVVPPFL                                                                      | ACE-inhibitory                                                           |
|  | PQNIPPLTQTPVVPPFLQ<br>PEVM(+15.99)GVSKV                                             | ACE-inhibitory                                                           |
|  | KVLPVPQKAVPYPQRD                                                                    | Antimicrobial<br>Antioxidant                                             |
|  | YPPFGPIPNSLP                                                                        | Antimicrobial<br>ACE-inhibitory<br>anti-anxiety                          |
|  | QPHQPLPPTVM(+15.99)FP<br>PQ, QPHQPLPPTVMFPPQ                                        | Anti-inflammatory<br>ACE-inhibitory                                      |
|  | KYPVEPFTESQSLT                                                                      | ACE-inhibitory                                                           |
|  | EELNVPGEIVESLSSSEESI<br>T,<br>EELNVPGEIVESLSS(+79.9<br>7)SEESIT                     | Caseinophosphopeptid<br>e<br>Immunomodulatory<br>promotes calcium uptake |
|  | QS(+79.97)EEQQQTEDELQ                                                               | Promote calcium uptake                                                   |
|  | KAVPYPQR                                                                            | Antioxidant<br>Antimicrobial<br>ACE-inhibitory                           |
|  | AVPYPQRDMPIQAFLL,<br>AVPYPQRDM(+15.99)PIQA<br>FLL                                   | Antimicrobial                                                            |
|  | VVVPFLQPEVM(+15.99)                                                                 | Antimicrobial                                                            |
|  | EEQQQTEDELQDKIHPF                                                                   | Promote calcium uptake                                                   |

|  |  |                                            |                                                                                                                            |
|--|--|--------------------------------------------|----------------------------------------------------------------------------------------------------------------------------|
|  |  |                                            | uptake                                                                                                                     |
|  |  | PQNIPPLTQTPVVVPPFLQ<br>PEVM(+15.99)GVS     | ACE-inhibitory                                                                                                             |
|  |  | QQQTEDELQDKIHPF                            | Antimicrobial                                                                                                              |
|  |  | EAM(+15.99)APKHKEM(+15.99)PFPKY PVEPFTE SQ | protective effects in indomethacin-induced enteritis through preservation of goblet cells and improvement in wound healing |
|  |  |                                            | Opioid                                                                                                                     |
|  |  |                                            | increases mMuc4 expression                                                                                                 |
|  |  |                                            | increase small intestinal goblet cell density                                                                              |
|  |  |                                            | Increase MUC2 expression                                                                                                   |
|  |  | LLYQEPVLGPVRGPFPII                         | immunomodulatory                                                                                                           |
|  |  |                                            | antithrombin                                                                                                               |
|  |  |                                            | Antimicrobial                                                                                                              |
|  |  |                                            | ACE-inhibitory                                                                                                             |
|  |  | YPPFGPIPNSLPQNIPPLTQT                      | ACE-inhibitory                                                                                                             |
|  |  | LTDVENLHLPLPL                              | Antimicrobial                                                                                                              |
|  |  | LNVPGEIVESLS(+79.97)SS(+79.97)EESITR       | Caseinophosphopeptide                                                                                                      |
|  |  |                                            | Immunomodulatory<br>promotes calcium uptake                                                                                |
|  |  | KEM(+15.99)PFPKY PVEPFTE                   | Antioxidant                                                                                                                |
|  |  | LTDVENLHL                                  | ACE-inhibitory                                                                                                             |
|  |  | PVRGPFPII                                  | ACE-inhibitory                                                                                                             |
|  |  | M(+15.99)PFPKY PVE                         | ACE-inhibitory                                                                                                             |
|  |  | EM(+15.99)PFPKY, EMPFPKY                   | Increase MUC4 expression                                                                                                   |
|  |  |                                            | Bradykinin-Potentiating                                                                                                    |
|  |  |                                            | Antimicrobial                                                                                                              |
|  |  |                                            | ACE-inhibitory                                                                                                             |

|  |                                                |                                                                                                                            |
|--|------------------------------------------------|----------------------------------------------------------------------------------------------------------------------------|
|  | VEPFTESQSLTLTD                                 | ACE-inhibitory                                                                                                             |
|  | PFPKY PVEPFT                                   | ACE-inhibitory                                                                                                             |
|  |                                                | Antioxidant                                                                                                                |
|  | QSKVLPVPQKAVPYPQ                               | Antimicrobial                                                                                                              |
|  |                                                | Antioxidant                                                                                                                |
|  | SQSKVLPVPQKAVPY                                | Antioxidant                                                                                                                |
|  | YFPFGPIPNSLPQNIPPLT                            | ACE-inhibitory                                                                                                             |
|  | QTEDELQDKIHP                                   | Antimicrobial                                                                                                              |
|  | KEAM(+15.99)APKHKEM(+15.99)PFPKY PVEPFTESQSLTL | protective effects in indomethacin-induced enteritis through preservation of goblet cells and improvement in wound healing |
|  |                                                | Opioid                                                                                                                     |
|  |                                                | increases mMuc4 expression                                                                                                 |
|  |                                                | increase small intestinal goblet cell density                                                                              |
|  |                                                | Increase MUC2 expression                                                                                                   |
|  | QTPVVVPPFLQPEVM(+15.99)G                       | Antioxidant                                                                                                                |
|  | ENLHLPLPL                                      | ACE-inhibitory                                                                                                             |
|  |                                                | Antimicrobial                                                                                                              |
|  | YFPFGPIPNSLPQ                                  | Antimicrobial                                                                                                              |
|  |                                                | ACE-inhibitory                                                                                                             |
|  | NSLPQNIPPLTQTPVVVPPFLQPEVM(+15.99)GVS          | ACE-inhibitory                                                                                                             |
|  | KEM(+15.99)PFPKY PV                            | ACE-inhibitory                                                                                                             |
|  | SLPQNIPPLT                                     | DPP-IV Inhibitory                                                                                                          |
|  | QTEDELQDKIHPF                                  | Antimicrobial                                                                                                              |
|  | ELNVPGEIVE                                     | ACE-inhibitory                                                                                                             |
|  |                                                | Antioxidant                                                                                                                |
|  |                                                | Antimicrobial                                                                                                              |
|  | LPQNIPPLTQTPVVVPPFLQPEVM(+15.99)               | ACE-inhibitory                                                                                                             |
|  | HQPHQPLPPTVMFPPQSVL                            | Anti-inflammatory                                                                                                          |
|  | HQPHQPLPPTVM(+15.99)F                          | ACE-inhibitory                                                                                                             |



|  |                                                               |                   |
|--|---------------------------------------------------------------|-------------------|
|  | PPQSVL                                                        |                   |
|  | NSLPQNIPPLTQTPVVVPP<br>FLQPEVM(+15.99)                        | ACE-inhibitory    |
|  | ELNVPGEIVESL                                                  | Antioxidant       |
|  |                                                               | Antimicrobial     |
|  | HKEM(+15.99)PFPKY                                             | Antimicrobial     |
|  | FLLYQEPVLPVVR                                                 | Anti-inflammatory |
|  |                                                               | ACE-inhibitory    |
|  | YPVEPFTESQSLTLTDV                                             | ACE-inhibitory    |
|  | YFPFGPIPNSLPQN                                                | ACE-inhibitory    |
|  | HQPHQPLPPTVM(+15.99)F<br>PPQSVLS,<br>HQPHQPLPPTVMFPPQSVL<br>S | Anti-inflammatory |
|  |                                                               | ACE-inhibitory    |
|  | PPLTQTPVVVPPFLQPEV                                            | ACE-inhibitory    |
|  | PFPKYPVEPFTESQSLT                                             | ACE-inhibitory    |
|  | IPPLTQTPVVVPPFLQ                                              | ACE-inhibitory    |
|  | SVLSLSQSKVLPVPQK                                              | ACE-inhibitory    |
|  | IPPLTQTPVV                                                    | ACE-inhibitory    |
|  | VYFPFGPIPNSLPQN                                               | ACE-inhibitory    |
|  | KEM(+15.99)PFPKYPVEPF<br>TESQSLTL                             | Antioxidant       |
|  | LTDVENLHLPLP                                                  | Antimicrobial     |
|  | KHKEM(+15.99)PFP                                              | Antimicrobial     |
|  | EDELQDKIHFAQ                                                  | Antimicrobial     |
|  | VYFPFGPIPNSLPQ                                                | ACE-inhibitory    |
|  | PPQSVLSLSQSKVLPVPQK<br>AVP                                    | ACE-inhibitory    |
|  | KYPVEPFTESQSLTLTD                                             | ACE-inhibitory    |
|  | LSQSKVLPVPQKAVPYPQ                                            | Antioxidant       |
|  | M(+15.99)HQPHQPLPPTV<br>M(+15.99)FPPQS                        | Anti-inflammatory |
|  |                                                               | ACE-inhibitory    |
|  | QPHQPLPPTVM(+15.99)FP<br>P, QPHQPLPPTVMFPP                    | Anti-inflammatory |
|  |                                                               | ACE-inhibitory    |
|  | LVYFPFGPIPNSLPQN                                              | ACE-inhibitory    |
|  | PPLTQTPVVV                                                    | ACE-inhibitory    |
|  | LPQNIPPLTQ                                                    | DPP-IV Inhibitory |
|  | PVLGPVRGFPF                                                   | Cytomodulatory    |
|  |                                                               | ACE-inhibitory    |
|  | PPLTQTPVVVPPFL                                                | ACE-inhibitory    |
|  | M(+15.99)HQPHQPLPPTV<br>M(+15.99)FPPQ                         | Anti-inflammatory |
|  |                                                               | ACE-inhibitory    |
|  | KKIEKFQSEEQQQTEDELQ                                           | Promote calcium   |

|  |                                |                                 |
|--|--------------------------------|---------------------------------|
|  | DKIHFP                         | uptake                          |
|  | LVYFPFGPIPNSLP                 | ACE-inhibitory                  |
|  | APKHKEMPFKYPVEPFT              | Antioxidant                     |
|  | SKVLPVPQKAVPYPQRD              | Antimicrobial                   |
|  |                                | Antioxidant                     |
|  | LVYFPFGPIPNSLPQNIPPL<br>TQT    | ACE-inhibitory                  |
|  | TPVVVPPFLQ                     | Antimicrobial                   |
|  |                                | ACE-inhibitory                  |
|  | TQSLVYFPFGPIPNSLP              | ACE-inhibitory                  |
|  | IEKFQSEEQQTDELQDK<br>I         | Promote calcium uptake          |
|  | KVLPVPQKAVPYP                  | Antimicrobial                   |
|  | KHKEM(+15.99)PFKYPVE<br>PFTESQ | Antioxidant                     |
|  | VYFPFGPIPNS                    | prolyl endopeptidase-inhibitory |
|  |                                | PEP-inhibitory                  |
|  |                                | DPP-IV Inhibitory               |
|  |                                | ACE-inhibitory                  |
|  |                                | Antioxidant                     |
|  |                                | ACE-inhibitory                  |
|  |                                | anti-anxiety                    |
|  | FPGPIPNSLPQNIPP                | ACE-inhibitory                  |
|  | HKEM(+15.99)PFKYPVEP<br>FT     | Antioxidant                     |
|  | HQPHQPLPPTVM(+15.99)<br>FPP    | Anti-inflammatory               |
|  |                                | ACE-inhibitory                  |
|  | SLSQSKVLPVPQKAVPY              | Antioxidant                     |
|  | RELEELNVPGEIVESLSSE            | Caseinophosphopeptide           |
|  |                                | Immunomodulatory                |
|  |                                | promotes calcium uptake         |
|  | ELEELNVPGEIVESLSSEE<br>S       | Caseinophosphopeptide           |
|  |                                | Immunomodulatory                |
|  |                                | promotes calcium uptake         |
|  | FPFGPIPNSLPQNIPPLTQT           | ACE-inhibitory                  |
|  | FPGPIPNSLPQNIPPL               | ACE-inhibitory                  |
|  | QNIPPLTQTPVVVPPFLQP            | ACE-inhibitory                  |

|  |                                                                                                                                        |                                                                                                                                                 |
|--|----------------------------------------------------------------------------------------------------------------------------------------|-------------------------------------------------------------------------------------------------------------------------------------------------|
|  | EVM(+15.99)GVSKV                                                                                                                       |                                                                                                                                                 |
|  | NLHLPLPL                                                                                                                               | ACE-inhibitory                                                                                                                                  |
|  | VYFPFGPIPNSLPQNIPPLT                                                                                                                   | ACE-inhibitory                                                                                                                                  |
|  | RDMPIQAFL                                                                                                                              | ACE-inhibitory                                                                                                                                  |
|  | IPPLTQTPVVVPPFLQP                                                                                                                      | ACE-inhibitory                                                                                                                                  |
|  | PFPKYVVEPFTESQSLTL                                                                                                                     | ACE-inhibitory                                                                                                                                  |
|  | FPGPIPNSLPQNIPPLTQ                                                                                                                     | ACE-inhibitory                                                                                                                                  |
|  | SWMHQPHQPLPPT                                                                                                                          | Antioxidant                                                                                                                                     |
|  |                                                                                                                                        | Anti-inflammatory                                                                                                                               |
|  |                                                                                                                                        | ACE-inhibitory                                                                                                                                  |
|  | QRDMPIQAFL                                                                                                                             | ACE-inhibitory                                                                                                                                  |
|  | AMAPKHK                                                                                                                                | Antimicrobial                                                                                                                                   |
|  | VVVPPFLQP                                                                                                                              | Antimicrobial                                                                                                                                   |
|  |                                                                                                                                        | ACE-inhibitory                                                                                                                                  |
|  | WMHQPHQPLPPT                                                                                                                           | Antioxidant                                                                                                                                     |
|  |                                                                                                                                        | Anti-inflammatory                                                                                                                               |
|  |                                                                                                                                        | ACE-inhibitory                                                                                                                                  |
|  | M(+15.99)HQPHQPLPPTV                                                                                                                   | Anti-inflammatory                                                                                                                               |
|  | M(+15.99)FPPQSVL                                                                                                                       | ACE-inhibitory                                                                                                                                  |
|  | SLVYFPFGPIPNSLPQNIPP                                                                                                                   | ACE-inhibitory                                                                                                                                  |
|  | SKVKEAM(+15.99)APKHK<br>EMPFPKYVVEPFTERQ,<br>SKVKEAM(+15.99)APKHK<br>EM(+15.99)PFPKYVVEPFT<br>ERQ,<br>SKVKEAMAPKHKEMPFP<br>KYPVEPFTERQ | protective effects<br>in<br>indomethacin-induced<br>enteritis through<br>preservation of<br>goblet cells and<br>improvement in<br>wound healing |
|  |                                                                                                                                        | Opioid                                                                                                                                          |
|  |                                                                                                                                        | increases mMuc4<br>expression                                                                                                                   |
|  |                                                                                                                                        | increase small<br>intestinal goblet<br>cell density                                                                                             |
|  |                                                                                                                                        | Increase MUC2<br>expression                                                                                                                     |
|  | YFPFGPIHN                                                                                                                              | DPP-IV Inhibitory                                                                                                                               |
|  |                                                                                                                                        | ACE-inhibitory                                                                                                                                  |
|  |                                                                                                                                        | Antioxidant                                                                                                                                     |
|  |                                                                                                                                        | anti-anxiety                                                                                                                                    |
|  | VYFPFGPIHN                                                                                                                             | prolyl<br>endopeptidase-inhibito<br>ry                                                                                                          |

|  |  |                                                        |                                                                                                                            |
|--|--|--------------------------------------------------------|----------------------------------------------------------------------------------------------------------------------------|
|  |  |                                                        | PEP-inhibitory                                                                                                             |
|  |  |                                                        | prolyl endopeptidase-inhibitory                                                                                            |
|  |  |                                                        | DPP-IV Inhibitory                                                                                                          |
|  |  |                                                        | ACE-inhibitory                                                                                                             |
|  |  |                                                        | Antioxidant                                                                                                                |
|  |  |                                                        | anti-anxiety                                                                                                               |
|  |  | GVSKVKEAM(+15.99)APK<br>HKEM(+15.99)PFPKYPVEP<br>FTERQ | protective effects in indomethacin-induced enteritis through preservation of goblet cells and improvement in wound healing |
|  |  |                                                        | Opioid                                                                                                                     |
|  |  |                                                        | increases mMuc4 expression                                                                                                 |
|  |  |                                                        | increase small intestinal goblet cell density                                                                              |
|  |  |                                                        | Increase MUC2 expression                                                                                                   |
|  |  | LVYFPFGPIHN                                            | Antioxidant                                                                                                                |
|  |  |                                                        | ACE-inhibitory                                                                                                             |
|  |  | YFPFGPIH                                               | satiety                                                                                                                    |
|  |  |                                                        | reduces pancreas MDA level                                                                                                 |
|  |  |                                                        | Opioid                                                                                                                     |
|  |  |                                                        | Increases MUC5A expression                                                                                                 |
|  |  |                                                        | Increases MUC3 expression                                                                                                  |
|  |  |                                                        | Increases MUC2 expression                                                                                                  |
|  |  |                                                        | Increases jejunal mucus secretion                                                                                          |
|  |  |                                                        | immunomodulatory                                                                                                           |
|  |  |                                                        | Anxiolytic                                                                                                                 |
|  |  |                                                        | Anticancer                                                                                                                 |
|  |  |                                                        | ACE-inhibitory                                                                                                             |
|  |  |                                                        | Antioxidant                                                                                                                |

|                                 |                |                                             |                                        |
|---------------------------------|----------------|---------------------------------------------|----------------------------------------|
|                                 |                |                                             | prolyl<br>endopeptidase-inhibito<br>ry |
|                                 |                |                                             | PEP-inhibitory                         |
|                                 |                |                                             | Antioxidant                            |
|                                 |                | SLVYFPFGPIHNSLPQ                            | ACE-inhibitory                         |
|                                 |                | HNSLPQNIPPLTQTPVVVP<br>PFLQPEV              | ACE-inhibitory                         |
|                                 |                | FPGPIHN                                     | DPP-IV Inhibitory                      |
|                                 |                | HNSLPQNIPPLTQTPVVVP<br>PFLQPEVM(+15.99)GVS  | ACE-inhibitory                         |
|                                 |                | SLVYFPFGPIHNSLPQN                           | ACE-inhibitory                         |
|                                 |                | IHNSLPQNIPPLTQTPVVVP<br>PFLQPEVM(+15.99)GVS | ACE-inhibitory                         |
|                                 |                | SLVYFPFGPIH                                 | ACE-inhibitory                         |
|                                 |                | HNSLPQNIPPLTQTPVVVP<br>PFLQPEVM(+15.99)G    | ACE-inhibitory                         |
|                                 |                | YFPFGPIHNSLPQNIPP                           | ACE-inhibitory                         |
|                                 |                | VYFPFGPIH                                   | prolyl<br>endopeptidase-inhibito<br>ry |
|                                 |                |                                             | PEP-inhibitory                         |
|                                 |                |                                             | Antioxidant                            |
|                                 |                |                                             | ACE-inhibitory                         |
|                                 |                | HNSLPQNIPPLTQTPVVVP<br>PFLQPEVM(+15.99)     | ACE-inhibitory                         |
| IHNSLPQNIPPLTQTPVVVP<br>PFLQPEV | ACE-inhibitory |                                             |                                        |
| YFPFGPIHNSLPQNI                 | ACE-inhibitory |                                             |                                        |
| P02668;A0A140<br>T8A9           | CSN3           | NQFLPYPHYAKPAAV                             | Antioxidant                            |
|                                 |                | NNQFLPYPHYAKPAA                             | Antioxidant                            |
|                                 |                | YQQKPVA                                     | Antimicrobial<br>ACE-inhibitory        |
|                                 |                | NQFLPYPHYAKPA                               | Antioxidant                            |
|                                 |                | SDKIAKY                                     | Antimicrobial<br>ACE-inhibitory        |
|                                 |                | NQFLPYPHYAKPAA                              | Antioxidant                            |
|                                 |                | NYYQQKPVA                                   | Antimicrobial                          |
|                                 |                | ALINNQFLPYPHYAKPAA                          | Antioxidant                            |
|                                 |                | LSRYPSY                                     | Opioid                                 |
|                                 |                | NNQFLPYPHYAKPA                              | Antioxidant                            |
|                                 |                | YYQQKPVA                                    | Antimicrobial                          |
|                                 |                | INNQFLPYPHYAKPA                             | Antioxidant                            |

|                 |               |                                     |                   |
|-----------------|---------------|-------------------------------------|-------------------|
|                 |               | ARHPHPLSF                           | ACE-inhibitory    |
|                 |               |                                     | Osteoanabolic     |
|                 |               |                                     | Antioxidant       |
|                 |               | NQFLPYPYYAKP                        | Antioxidant       |
|                 |               | INNQLPYPYYAKPAA                     | Antioxidant       |
|                 |               | LINNQLPYPYYAKPAAV                   | Antioxidant       |
|                 |               | AKYIPIQYV                           | Antioxidant       |
|                 |               | QFLPYPYYAKPAAV                      | Antioxidant       |
|                 |               | HPHPHLS                             | ACE-inhibitory    |
|                 |               |                                     | Osteoanabolic     |
|                 |               | FFSDKIA                             | Antimicrobial     |
|                 |               |                                     | ACE-inhibitory    |
|                 |               | NNQLPYPYYAKP                        | Antioxidant       |
|                 |               | IPPKNQDKTEIPTINTI                   | Antimicrobial     |
|                 |               | YIPIQYV                             | ACE-inhibitory    |
|                 |               | ARHPHPLS                            | Antioxidant       |
|                 |               | NNQLPYPYYAKPAAV                     | Antioxidant       |
|                 |               | NQFLPYPYYAKPAAVR                    | Antioxidant       |
|                 |               | INNQLPYPYYAKP                       | Antioxidant       |
|                 |               | NNQLPYPYYAKPAAVR                    | Antioxidant       |
|                 |               | ALINNQLPYP                          | DPP-IV Inhibitory |
|                 |               | INNQLPYP                            | DPP-IV Inhibitory |
|                 |               | RHPHPHLS                            | ACE-inhibitory    |
|                 |               |                                     | Osteoanabolic     |
|                 |               |                                     | Antioxidant       |
|                 |               | TMARHPHPHLS,<br>TM(+15.99)ARHPHPHLS | Antioxidant       |
|                 |               | YYQQKPV                             | Antimicrobial     |
|                 |               | IAKYIPIQYV                          | Antioxidant       |
|                 |               | INNQLPYPYYAKPAAV                    | Antioxidant       |
|                 |               | KDERFF                              | ACE-inhibitory    |
|                 |               | IPPKNQDKTEIPTINT                    | Antimicrobial     |
|                 |               | LINNQLPYPYYAKPA                     | Antioxidant       |
|                 |               | PPKNQDKTEIPTINTI                    | Antimicrobial     |
|                 |               | NYYQQKPV                            | Antimicrobial     |
|                 |               | SRYPSYGLNY                          | Opioid            |
|                 |               | IPPKNQDKTEIPTIN                     | Antimicrobial     |
|                 |               | INNQLPYPYYAKPAAVR                   | Antioxidant       |
|                 |               | KYIPIQYV                            | Antioxidant       |
|                 |               | QFLPYPYYAKPAA                       | Antioxidant       |
|                 |               | EKDERFF                             | ACE-inhibitory    |
| YQQKPV          | Antimicrobial |                                     |                   |
| QFLPYPYYAKPAAVR | Antioxidant   |                                     |                   |

|  |                                                         |                                   |
|--|---------------------------------------------------------|-----------------------------------|
|  | LINNQFLPYPYYAKP                                         | Antioxidant                       |
|  | AIPPKKNQDKTEIPTINT                                      | Antimicrobial                     |
|  | LINNQFLPYPYYAKPAA                                       | Antioxidant                       |
|  | PPKKNQDKTEIPTINT                                        | Antimicrobial                     |
|  | KPAAVRSPAQIL                                            | Antimicrobial                     |
|  | TM(+15.99)ARHPHPLSF,<br>TMARHPHPLSF                     | Antioxidant                       |
|  | KPAAVRSPAQI                                             | Antimicrobial                     |
|  | ALINNQFLPYPYYAKP                                        | Antioxidant                       |
|  | AVRSPAQILQWQV                                           | Antioxidant                       |
|  | TVATLEDS(+79.97)PEVIES<br>PPEINT                        | Antimicrobial                     |
|  | HPHPHLSF                                                | ACE-inhibitory                    |
|  |                                                         | Osteoanabolic                     |
|  |                                                         | Antioxidant                       |
|  | RYPYGLNY                                                | Opioid                            |
|  | IPPKKNQDKT                                              | ACE-inhibitory                    |
|  |                                                         | ameliorates insulin<br>resistance |
|  | TVATLEDS(+79.97)PEVIES<br>PPEINTV                       | Antimicrobial                     |
|  | ALINNQFLPYPYYAKPA                                       | Antioxidant                       |
|  | VRSPAQILQWQ                                             | Antioxidant                       |
|  | NQFLPYPYYA                                              | DPP-IV Inhibitory                 |
|  | INNQFLPYPY                                              | DPP-IV Inhibitory                 |
|  | VLSRYPS                                                 | ACE-inhibitory                    |
|  | RSPAQILQWQ                                              | Antioxidant                       |
|  | IPPKKNQD                                                | ACE-inhibitory                    |
|  | PPKKNQDKTEIPTINTIA                                      | Antimicrobial                     |
|  | AVRSPAQILQWQ                                            | Antimicrobial                     |
|  |                                                         | Antioxidant                       |
|  | AVRSPAQILQ                                              | Antimicrobial                     |
|  |                                                         | Antioxidant                       |
|  | M(+15.99)AIPPKKNQDKTE<br>IPTINT,<br>MAIPPKKNQDKTEIPTINT | Antimicrobial                     |
|  | DERFF                                                   | ACE-inhibitory                    |
|  | RHPHPHLSF                                               | ACE-inhibitory                    |
|  |                                                         | Osteoanabolic                     |
|  |                                                         | Antioxidant                       |
|  | SRYPY                                                   | Opioid                            |
|  |                                                         | ACE-inhibitory                    |
|  | M(+15.99)AIPPKKNQDKTE                                   | Antimicrobial                     |

|                |                   |                                 |                          |
|----------------|-------------------|---------------------------------|--------------------------|
|                |                   | IPT                             |                          |
|                |                   | KPAAVRSPAQILQW                  | Antimicrobial            |
|                |                   | SRYPSTY                         | Opioid                   |
|                |                   |                                 | ACE-inhibitory           |
|                |                   | CEKDERF                         | ACE-inhibitory           |
|                |                   | YYQKPVAL                        | Antimicrobial            |
|                |                   | KPAAVRSPAQILQWQ                 | Antimicrobial            |
|                |                   |                                 | Antioxidant              |
|                |                   | VRSPAQILQWQV                    | Antioxidant              |
|                |                   | IPIQYVLSRYP                     | Opioid                   |
|                |                   |                                 | C3a Receptors agonist    |
| P02754         | LGB               | LIVTQTM(+15.99)K,<br>LIVTQTMK   | Cytotoxic                |
|                |                   |                                 | Antimicrobial            |
|                |                   | IDALNENK                        | Increase cellular growth |
|                |                   |                                 | Antimicrobial            |
|                |                   | LIVTQTMKG,<br>LIVTQTM(+15.99)KG | Cytotoxic                |
|                |                   | EELKPTPEGDL                     | DPP-IV Inhibitory        |
|                |                   |                                 | Antioxidant              |
|                |                   | IIAEKTKIPA                      | Antimicrobial            |
|                |                   | PEVDDEALEKF                     | DPP-IV Inhibitory        |
|                |                   |                                 | Antimicrobial            |
|                |                   |                                 | Antioxidant              |
|                |                   | DISLLDAQSAPLRV                  | Antimicrobial            |
|                |                   | DIQKVAGTWY                      | DPP-IV Inhibitory        |
|                |                   |                                 | ACE-inhibitory           |
|                |                   |                                 | Antimicrobial            |
|                |                   | EVDDEALEKF                      | DPP-IV Inhibitory        |
|                |                   |                                 | Antimicrobial            |
|                |                   | SDISLLDAQSAPLRV                 | Antimicrobial            |
|                |                   | IVTQTMKG,<br>IVTQTM(+15.99)KG   | Cytotoxic                |
|                |                   |                                 | Antimicrobial            |
|                |                   | LDIQKVAG                        | Antimicrobial            |
|                |                   |                                 | ACE-inhibitory           |
|                |                   | IQKVAGTWY                       | DPP-IV Inhibitory        |
| ACE-inhibitory |                   |                                 |                          |
| EELKPTPEGDLE   | DPP-IV Inhibitory |                                 |                          |
|                | Antimicrobial     |                                 |                          |
|                | Antioxidant       |                                 |                          |
| DAQSAPLRV      | Antimicrobial     |                                 |                          |
|                | ACE-inhibitory    |                                 |                          |



|  |                                         |                          |
|--|-----------------------------------------|--------------------------|
|  | RLSFNPT                                 | ACE-inhibitory           |
|  | LIVTQTMKGL,<br>LIVTQTM(+15.99)KGL       | Cytotoxic                |
|  | EELKPTPEGDLEIL                          | DPP-IV Inhibitory        |
|  | ELKPTPEGDLE                             | DPP-IV Inhibitory        |
|  | IIAEKTKIPAVFK                           | Antimicrobial            |
|  | EELKPTPEGDLEILL                         | DPP-IV Inhibitory        |
|  | YVEELKPTPEGDL                           | Antimicrobial            |
|  |                                         | Antioxidant              |
|  | LDAQSAPLRV                              | Antimicrobial            |
|  |                                         | ACE-inhibitory           |
|  | TPEVDDEALEKF                            | DPP-IV Inhibitory        |
|  |                                         | Antimicrobial            |
|  |                                         | Antioxidant              |
|  | DALNENKV                                | Increase cellular growth |
|  |                                         | Antimicrobial            |
|  | VEELKPTPEGDL                            | Antimicrobial            |
|  |                                         | Antioxidant              |
|  | GLDIQKV                                 | Hypocholesterolemic      |
|  |                                         | ACE-inhibitory           |
|  | ELKPTPEGDL                              | DPP-IV Inhibitory        |
|  | IDALNENKVL                              | Increase cellular growth |
|  |                                         | Antimicrobial            |
|  | SDISLLDAQSAPLR                          | Antimicrobial            |
|  | AEKTKIPAVF                              | Antimicrobial            |
|  | GLDIQKVAG                               | Antimicrobial            |
|  |                                         | ACE-inhibitory           |
|  | EELKPTPEGD                              | DPP-IV Inhibitory        |
|  | RTPEVDDEALEKF,<br>RT(+79.97)PEVDDEALEKF | DPP-IV Inhibitory        |
|  |                                         | Antimicrobial            |
|  | KIIAEKTKIPA                             | Antimicrobial            |
|  | GLDIQKVAGTWY                            | Antimicrobial            |
|  |                                         | ACE-inhibitory           |
|  | VEELKPTPEGDLEIL                         | DPP-IV Inhibitory        |
|  |                                         | Antimicrobial            |
|  |                                         | Antioxidant              |
|  | YVEELKPTPEGDLEIL                        | Hypocholesterolemic      |
|  |                                         | Antioxidant              |
|  | LKPTPEGDLE                              | DPP-IV Inhibitory        |
|  | VLDTDYK                                 | DPP-IV Inhibitory        |
|  |                                         | ACE-inhibitory           |

|  |                     |                          |
|--|---------------------|--------------------------|
|  | ELKPTPEGD           | DPP-IV Inhibitory        |
|  | DKALKALPM(+15.99)HI | Increase cellular growth |
|  | QSAPLRVYV           | ACE-inhibitory           |
|  | LKALPM(+15.99)HI    | Increase cellular growth |
|  |                     | DPP-IV Inhibitory        |
|  |                     | ACE-inhibitory           |
|  | DAQSAPLR            | Antimicrobial            |
|  |                     | ACE-inhibitory           |
|  | KPTPEGDLE           | DPP-IV Inhibitory        |
|  | IDALNENKV           | Increase cellular growth |
|  |                     | Antimicrobial            |
|  | KPTPEGDLEILL        | DPP-IV Inhibitory        |
|  | ELKPTPEGDLEIL       | DPP-IV Inhibitory        |
|  | PEVDDEALEKFD        | DPP-IV Inhibitory        |
|  |                     | Antimicrobial            |
|  | VEELKPTPEGDLEILL    | Hypocholesterolemic      |
|  | EVDDEALEK           | DPP-IV Inhibitory        |
|  |                     | Antimicrobial            |
|  | YVEELKPTPEGDLE      | Antimicrobial            |
|  |                     | Antioxidant              |
|  | DISLLDAQSAPLR       | Antimicrobial            |
|  | ELKPTPEGDLEILL      | DPP-IV Inhibitory        |
|  | LLDAQSAPLRV         | ACE-inhibitory           |
