# Supplementary material for: Peptidome profiling of human, bovine, and donkey colostrum through label-free quantitative analysis reveals proteolysis of milk proteins
Source: Royal Society of Chemistry journal article supplement (doi:10.1039/d4fo00689e), 2024-01-01
Supplement: d4fo00689e6.pdf [file d4fo00689e6.pdf]

Table S4. Bioactive peptides present in donkey colostrum.

| Parent proteins | Protein description | Peptides                                           | Function       |
|-----------------|---------------------|----------------------------------------------------|----------------|
| D2EC27          | CSN2                | APFPQPVVP                                          | ACE-inhibitory |
|                 |                     | VPYPQRD                                            | Antioxidant    |
|                 |                     |                                                    | Antimicrobial  |
|                 |                     |                                                    | ACE-inhibitory |
|                 |                     | APFPQPVVPYP                                        | ACE-inhibitory |
|                 |                     | VPYPQRDTPVQAFL                                     | Antimicrobial  |
|                 |                     | S(+79.97)S(+79.97)EESITHIN, SS(+79.97)EESITHIN     | Antimicrobial  |
|                 |                     | VAPFPQPVVPYP                                       | ACE-inhibitory |
|                 |                     | DS(+79.97)SSEESITHIN, DS(+79.97)S(+79.97)SEESITHIN | Antimicrobial  |
|                 |                     | VPYPQRDTPVQAFL                                     | Antimicrobial  |
|                 |                     | SS(+79.97)S(+79.97)EESITHI                         | Antimicrobial  |
|                 |                     | SS(+79.97)SEESITHIN, SS(+79.97)S(+79.97)EESITHIN   | Antimicrobial  |
| APFPQPVV        | ACE-inhibitory      |                                                    |                |
| B7VGF9          | CSN1S2              | IVLTPWDQTK                                         | Antimicrobial  |
