# Supplementary material for: Peptidome profiling of human, bovine, and donkey colostrum through label-free quantitative analysis reveals proteolysis of milk proteins
Source: Royal Society of Chemistry journal article supplement (doi:10.1039/d4fo00689e), 2024-01-01
Supplement: d4fo00689e7.pdf [file d4fo00689e7.pdf]

Table S5. Unique expressed bioactive peptides in human colostrum.

| Parent proteins | Protein description | Peptides                                                                              | Function                 |
|-----------------|---------------------|---------------------------------------------------------------------------------------|--------------------------|
| P05814          | CSN2                | SPTIPFFDPQIP                                                                          | Increase cellular growth |
| P05814          | CSN2                | NQELLLNPTHQIYPV<br>TQPLAPVHNP                                                         | Antimicrobial            |
| P05814          | CSN2                | GRVMPVLKSPTIPFF<br>DPQIPK,<br>GRVM(+15.99)PVLKS<br>PTIPFFDPQIPK                       | Immunomodulatory         |
| P05814          | CSN2                | LLNQELLLNPTHQIY<br>PVTQPLAPVHNPISV,<br>LLNQELLLNPTHQIY<br>PVTQPLAPVHNPIS(+<br>79.97)V | Antimicrobial            |
| P05814          | CSN2                | LLNPTHQIYPVTQPL<br>APVHNPIS                                                           | Antimicrobial            |
| P05814          | CSN2                | DTVYTKGRV                                                                             | ACE-inhibitory           |
| P05814          | CSN2                | DLENLHLP                                                                              | ACE-inhibitory           |
| P05814          | CSN2                | TQPLAPVHNPIS                                                                          | Antimicrobial            |
| P05814          | CSN2                | ELLLNPTHQIYPVTQP<br>LAPVHNPIS                                                         | Antimicrobial            |
| P05814          | CSN2                | SPTIPFFDPQIPK                                                                         | Increase cellular growth |
| P05814          | CSN2                | QELLLNPTHQIYPVT<br>QPLAPVHNPISV                                                       | Antimicrobial            |
| P05814          | CSN2                | NQELLLNPTHQIYPV<br>TQPLAPVHNPISV,<br>NQELLLNPTHQIYPV<br>TQPLAPVHNPIS(+79.<br>97)V     | Antimicrobial            |
| P05814          | CSN2                | EPIPYGFLPQN                                                                           | ACE-inhibitory           |
| P05814          | CSN2                | LLNPTHQIYPVTQPL<br>APVHNPIS                                                           | Antimicrobial            |
| P05814          | CSN2                | GRVMPVLKSPTIPFF<br>DPQIP,<br>GRVM(+15.99)PVLKS<br>PTIPFFDPQIP                         | Immunomodulatory         |
| P05814          | CSN2                | VMPVLKSPTIPFFDPQ<br>IPK,<br>VM(+15.99)PVLKSPTI<br>PFFDPQIPK                           | Immunomodulatory         |
| P05814          | CSN2                | LTDLENLHLPLP                                                                          | ACE-inhibitory           |
| P05814          | CSN2                | ETIESLSSSEESITEY,<br>ETIES(+79.97)LS(+79.9                                            | Increase cellular growth |

|        |      |                                                                                                                                            |                          |
|--------|------|--------------------------------------------------------------------------------------------------------------------------------------------|--------------------------|
|        |      | 7)SSEESITEY,<br>ETIESLSSEES(+79.97<br>)ITEY,<br>ETIES(+79.97)LS(+79.9<br>7)SS(+79.97)EESITEY                                               |                          |
| P05814 | CSN2 | LNPTHQIYPVTQPLA<br>PVHNPIS                                                                                                                 | Antimicrobial            |
| P05814 | CSN2 | MPVLKSPTIPFFDPQI<br>PK,<br>M(+15.99)PVLKSPTIP<br>FFDPQIPK                                                                                  | Immunomodulatory         |
| P05814 | CSN2 | TQPLAPVHNPISV                                                                                                                              | Antimicrobial            |
| P05814 | CSN2 | MPVLKSPTIPFFDPQI<br>P,<br>M(+15.99)PVLKSPTIP<br>FFDPQIP                                                                                    | Immunomodulatory         |
| P05814 | CSN2 | NQELLLNPTHQIYPV<br>TQPLAPVHNPIS                                                                                                            | Antimicrobial            |
| P05814 | CSN2 | NQELLLNPTHQIYP                                                                                                                             | Antimicrobial            |
| P05814 | CSN2 | LLNPTHQIYPVTQPL<br>APVHNPISV,<br>LLNPTHQIYPVTQPL<br>APVHNPIS(+79.97)V                                                                      | Antimicrobial            |
| P05814 | CSN2 | TIESLSSEESITEYK,<br>TIESLSS(+79.97)SEESI<br>TEYK,<br>TIESLS(+79.97)SS(+79.<br>97)EESITEYK,<br>TIES(+79.97)LS(+79.97<br>)S(+79.97)SEESITEYK | Increase cellular growth |
| P05814 | CSN2 | LNQELLLNPTHQIYP<br>VTQPLAPVHNPISV                                                                                                          | Antimicrobial            |
| P05814 | CSN2 | DLENLHLPLP                                                                                                                                 | ACE-inhibitory           |
| P05814 | CSN2 |                                                                                                                                            | Antimicrobial            |
| P05814 | CSN2 | NQELLLNPTHQIYPV<br>TQ                                                                                                                      | Antimicrobial            |
| P05814 | CSN2 | VLKSPTIPFFDPQIP                                                                                                                            | Increase cellular growth |
| P05814 | CSN2 | LNQELLLNPTHQIYP<br>VTQPLAPVHNPIS                                                                                                           | Antimicrobial            |
| P05814 | CSN2 | YPVTQPLAPVHNPIS<br>V,<br>YPVTQPLAPVHNPIS(<br>+79.97)V                                                                                      | Antimicrobial            |
| P05814 | CSN2 | RETIESLSSEESITEY                                                                                                                           | Increase cellular growth |

|        |      |                                                                                                                                        |                          |
|--------|------|----------------------------------------------------------------------------------------------------------------------------------------|--------------------------|
|        |      | K,<br>RETIESLS(+79.97)SSE<br>ESITEYK,<br>RETIESLS(+79.97)SS(<br>+79.97)EESITEYK,<br>RET(+79.97)IESLSS(+7<br>9.97)S(+79.97)EESITE<br>YK |                          |
| P05814 | CSN2 | TDLENLHLPLP                                                                                                                            | ACE-inhibitory           |
| P05814 | CSN2 |                                                                                                                                        | Antimicrobial            |
| P05814 | CSN2 | LLNQELLLNPTHQIY<br>PVTQPLAPVHNPI                                                                                                       | Antimicrobial            |
| P05814 | CSN2 | NPTHQIYPVTQPLAP<br>VHNPIV,<br>NPTHQIYPVTQPLAP<br>VHNPI(+79.97)V                                                                        | Antimicrobial            |
| P05814 | CSN2 | ETIESLSSEESITEYK<br>QKVE,<br>ETIESLSS(+79.97)S(+7<br>9.97)EESITEYKQKVE                                                                 | Increase cellular growth |
| P05814 | CSN2 | T(+79.97)IESLSSSEESI<br>TEY,<br>TIESLSSEESITEY,<br>T(+79.97)IESLSSS(+79.<br>97)EESITEY                                                 | Increase cellular growth |
| P05814 | CSN2 | QDKIYPSFQPQPL                                                                                                                          | ACE-inhibitory           |
| P05814 | CSN2 | NQELLLNPTHQIYPV                                                                                                                        | Antimicrobial            |
| P05814 | CSN2 | LLNQELLLNPTHQIY<br>PV                                                                                                                  | Antimicrobial            |
| P05814 | CSN2 | VLKSPTIPFFDPQIPK                                                                                                                       | Increase cellular growth |
| P05814 | CSN2 | LLLNPTHQIYPVTQPL<br>APVHNPI                                                                                                            | Antimicrobial            |
| P05814 | CSN2 | LLLNQELLLNPTHQI<br>YPVTQPLAPVHNPI<br>V                                                                                                 | Antimicrobial            |
| P05814 | CSN2 | QIYPVTQPLAPVHNPI<br>SV                                                                                                                 | Antimicrobial            |
| P05814 | CSN2 | NQELLLNPTHQIYPV<br>TQPLAPVH                                                                                                            | Antimicrobial            |
| P05814 | CSN2 | NQELLLNPTHQIYPV<br>TQPLAPVHNPI                                                                                                         | Antimicrobial            |
| P05814 | CSN2 | VPQPIPQ                                                                                                                                | ACE-inhibitory           |
| P05814 | CSN2 |                                                                                                                                        | ACE-inhibitory           |
| P05814 | CSN2 | DLENLHLPLPLL                                                                                                                           | ACE-inhibitory           |

|        |      |                                                                                                                                                                    |                          |
|--------|------|--------------------------------------------------------------------------------------------------------------------------------------------------------------------|--------------------------|
| P05814 | CSN2 |                                                                                                                                                                    | Antimicrobial            |
| P05814 | CSN2 | ELLNPTHQIYPVTQP<br>LAPVHNPIV                                                                                                                                       | Antimicrobial            |
| P05814 | CSN2 | RETIESLSSEESITEY,<br>RETIESLSS(+79.97)SE<br>ESITEY,<br>RETIESLSSS(+79.97)E<br>ESIT(+79.97)EY,<br>RETIES(+79.97)LS(+79<br>.97)S(+79.97)SEESITE<br>Y                 | Increase cellular growth |
| P05814 | CSN2 | NQELLNPTHQIYPV<br>T                                                                                                                                                | Antimicrobial            |
| P05814 | CSN2 | TIPFFDPQIPK                                                                                                                                                        | Increase cellular growth |
| P05814 | CSN2 | LNQELLNPTHQIYP<br>V                                                                                                                                                | Antimicrobial            |
| P05814 | CSN2 | LLNPTHQIYPVTQPL<br>APVHNPIV,<br>LLNPTHQIYPVTQPL<br>APVHNPIV(+79.97)V                                                                                               | Antimicrobial            |
| P05814 | CSN2 | ELLNPTHQIYPVTQP<br>LAPVHNPI                                                                                                                                        | Antimicrobial            |
| P05814 | CSN2 | ETIESLSS(+79.97)S(+7<br>9.97)EESITEYKQ,<br>ETIESLSSEESITEYK<br>Q,<br>ETIESLS(+79.97)SSEE<br>SITEYKQ,<br>ETIESLS(+79.97)S(+79<br>.97)S(+79.97)EESITEY<br>KQ         | Increase cellular growth |
| P05814 | CSN2 | DLENLHLPLPL                                                                                                                                                        | ACE-inhibitory           |
| P05814 | CSN2 |                                                                                                                                                                    | Antimicrobial            |
| P05814 | CSN2 | RETIESLSS(+79.97)S(+<br>79.97)EESITEYKQK,<br>RETIESLSSEESITEY<br>KQK,<br>RETIESLSSS(+79.97)E<br>ESITEYKQK,<br>RETIESLS(+79.97)S(+7<br>9.97)S(+79.97)EESITE<br>YKQK | Increase cellular growth |
| P05814 | CSN2 | LWSVPQPK                                                                                                                                                           | Antioxidant              |
| P05814 | CSN2 |                                                                                                                                                                    | ACE-inhibitory           |

|        |      |                                                                                                                                       |                               |
|--------|------|---------------------------------------------------------------------------------------------------------------------------------------|-------------------------------|
| P05814 | CSN2 | YPSFQPQPLI                                                                                                                            | ACE-inhibitory                |
| P05814 | CSN2 | PTIPFFDPQIPKLT                                                                                                                        | Increase cellular growth      |
| P05814 | CSN2 | RETIESLSS(+79.97)S(+79.97)EESITEYKQKVE,<br>RETIESLSSEESITEYKQKVE,<br>RETIESLS(+79.97)S(+79.97)S(+79.97)EESITEYKQKVE                   | Increase cellular growth      |
| P05814 | CSN2 | LNPTHQIYPVTQPLA<br>PVHNPISV                                                                                                           | Antimicrobial                 |
| P05814 | CSN2 | YPFVEPIP                                                                                                                              | Opioid                        |
| P05814 | CSN2 |                                                                                                                                       | Anticancer                    |
| P05814 | CSN2 |                                                                                                                                       | promote beta-cell development |
| P05814 | CSN2 |                                                                                                                                       |                               |
| P05814 | CSN2 | ETIESLSSS(+79.97)EESITEYK,<br>ETIESLSSEESITEYK<br>,<br>ET(+79.97)IES(+79.97)LSSEESITEYK,<br>ETIES(+79.97)LS(+79.97)S(+79.97)SEESITEYK | Increase cellular growth      |
| P05814 | CSN2 | QALLNQELLNPTH<br>QIYPVTQPLAPVHNPI<br>SV                                                                                               | Antimicrobial                 |
| P05814 | CSN2 | PFFDPQIPK                                                                                                                             | ACE-inhibitory                |
| P05814 | CSN2 | DTVYTKGRVMP,<br>DTVYTKGRVM(+15.99)P                                                                                                   | ACE-inhibitory                |
| P05814 | CSN2 | IESLSS(+79.97)SEESITEYK,<br>IESLSSSEESITEYK,<br>IES(+79.97)LS(+79.97)SS(+79.97)EESITEYK                                               | Increase cellular growth      |
| P05814 | CSN2 | ETIESLSS(+79.97)S(+79.97)EESITEYKQK,<br>ETIESLSSEESITEYKQK,<br>ETIESLSSS(+79.97)EESITEYKQK                                            | Increase cellular growth      |
| P05814 | CSN2 | SPTIPFFDPQIPKLT                                                                                                                       | Increase cellular growth      |

|        |      |                                                                                                                                                                 |                          |
|--------|------|-----------------------------------------------------------------------------------------------------------------------------------------------------------------|--------------------------|
| P05814 | CSN2 | VPYPQRA                                                                                                                                                         | Antioxidant              |
| P05814 | CSN2 |                                                                                                                                                                 | Antimicrobial            |
| P05814 | CSN2 |                                                                                                                                                                 | ACE-inhibitory           |
| P05814 | CSN2 | PVTQPLAPVHNPISV                                                                                                                                                 | Antimicrobial            |
| P05814 | CSN2 | GRVMPVLKSPTIPFF<br>DPQIPKLT,<br>GRVM(+15.99)PVLKS<br>PTIPFFDPQIPKLT                                                                                             | Immunomodulatory         |
| P05814 | CSN2 | IPFFDPQIPK                                                                                                                                                      | ACE-inhibitory           |
| P05814 | CSN2 | GRVM(+15.99)PVLKS<br>PTIPFFD,<br>GRVMPVLKSPTIPFF<br>D                                                                                                           | Immunomodulatory         |
| P05814 | CSN2 | PVLKSPTIPFFDPQIP                                                                                                                                                | Immunomodulatory         |
| P05814 | CSN2 | SPTIPFFDPQIPKLT                                                                                                                                                 | Increase cellular growth |
| P05814 | CSN2 | ETIESLSSEESITE,<br>ET(+79.97)IESLSSEE<br>SITE                                                                                                                   | Increase cellular growth |
| P05814 | CSN2 | LKSPTIPFFDPQIPK                                                                                                                                                 | Increase cellular growth |
| P05814 | CSN2 | VTQPLAPVHNPISV                                                                                                                                                  | Antimicrobial            |
| P05814 | CSN2 | RETIESLSS(+79.97)S(+<br>+79.97)EESITEYKQ,<br>RETIESLSSS(+79.97)E<br>ESITEYKQ,<br>RETIESLSSEESITEY<br>KQ,<br>RETIESLS(+79.97)S(+7<br>9.97)S(+79.97)EESITE<br>YKQ | Increase cellular growth |
| P05814 | CSN2 | LLNPTHQIYPVTQPL<br>APVHNPI                                                                                                                                      | Antimicrobial            |
| P05814 | CSN2 | IYPVTQPLAPVHNPIS<br>V                                                                                                                                           | Antimicrobial            |
| P05814 | CSN2 | QELLLNPTHQIYPVT<br>QPLAPVHNPIS                                                                                                                                  | Antimicrobial            |
| P05814 | CSN2 | LTDLENLH                                                                                                                                                        | ACE-inhibitory           |
| P05814 | CSN2 | TIESLSSEESITEYKQ<br>KVE                                                                                                                                         | Increase cellular growth |
| P05814 | CSN2 | ETIESLSSEESITEYK<br>QKV                                                                                                                                         | Increase cellular growth |
| P05814 | CSN2 | SPTIPFFDPQIPKL                                                                                                                                                  | Increase cellular growth |
| P05814 | CSN2 | YPSFQPQPLIYP                                                                                                                                                    | ACE-inhibitory           |
| P05814 | CSN2 | KDTVYTKGRVMP,<br>KDTVYTKGRVM(+15.                                                                                                                               | ACE-inhibitory           |

|        |      |                                                                     |                          |
|--------|------|---------------------------------------------------------------------|--------------------------|
|        |      | 99)P                                                                |                          |
| P05814 | CSN2 | PTIPFFDPQIPK                                                        | Increase cellular growth |
| P05814 | CSN2 | LNQELLLNPTHQIYP                                                     | Antimicrobial            |
| P05814 | CSN2 | ALLLNQELLLNPTHQ<br>IYPVTQPLAPVHNPI<br>V                             | Antimicrobial            |
| P05814 | CSN2 | LLNQELLLNPTHQIY<br>PVTQPLAPVHNPI                                    | Antimicrobial            |
| P05814 | CSN2 | HQIYPVTQPLAPVHN<br>PIS                                              | Antimicrobial            |
| P05814 | CSN2 | NQELLLNPTHQIYPV<br>TQP                                              | Antimicrobial            |
| P05814 | CSN2 | KSPTIPFFDPQIPK                                                      | Increase cellular growth |
| P05814 | CSN2 | DLENLHLPL                                                           | ACE-inhibitory           |
| P05814 | CSN2 | LHLPLPLLQP                                                          | ACE-inhibitory           |
| P05814 | CSN2 | FFDPQIPK                                                            | ACE-inhibitory           |
| P05814 | CSN2 | TVYTKGRVMPVL,<br>TVYTKGRVM(+15.99)<br>PVL                           | ACE-inhibitory           |
| P05814 | CSN2 | LLNQELLLNPTHQIY<br>P                                                | Antimicrobial            |
| P05814 | CSN2 | ELLLNPTHQIYPVTQP<br>LAPVHNPI                                        | Antimicrobial            |
| P05814 | CSN2 | LNQELLLNPTHQIYP<br>VTQPLAPVHNPI                                     | Antimicrobial            |
| P05814 | CSN2 | QELLLNPTHQIYPV                                                      | Antimicrobial            |
| P05814 | CSN2 | DTVYTKGRVMPV,<br>DTVYTKGRVM(+15.9<br>9)PV                           | ACE-inhibitory           |
| P05814 | CSN2 | YPVTQPLAPVHNPI                                                      | Antimicrobial            |
| P05814 | CSN2 | PTIPFFDPQIPKL                                                       | Increase cellular growth |
| P05814 | CSN2 | GRVMPVLKSPTIPFF<br>DPQIPKLT,<br>GRVM(+15.99)PVLKS<br>PTIPFFDPQIPKLT | Immunomodulatory         |
| P05814 | CSN2 | IYPVTQPLAPVHNPI                                                     | Antimicrobial            |
| P05814 | CSN2 | VMPVLKSPTIPFFDPQ<br>IPKLT,<br>VM(+15.99)PVLKSPTI<br>PFFDPQIPKLT     | Immunomodulatory         |
| P05814 | CSN2 | TIPFFDPQIP                                                          | ACE-inhibitory           |
| P05814 | CSN2 | IESLSS(+79.97)S(+79.9<br>7)EESITEYKQ                                | Increase cellular growth |

|        |      |                                                                                                   |                          |
|--------|------|---------------------------------------------------------------------------------------------------|--------------------------|
| P05814 | CSN2 | PVLKSPTIPFFDPQIPK                                                                                 | Immunomodulatory         |
| P05814 | CSN2 | TDLENLHLPLPL                                                                                      | Antimicrobial            |
| P05814 | CSN2 | PVLKSPTIPFFDPQIPK<br>LTD                                                                          | Immunomodulatory         |
| P05814 | CSN2 | QALLNQELLLNPTH<br>QIYPV                                                                           | Antimicrobial            |
| P05814 | CSN2 | MPVLKSPTIPFFDPQI<br>PKLTD,<br>M(+15.99)PVLKSPTIP<br>FFDPQIPKLTD                                   | Immunomodulatory         |
| P05814 | CSN2 | TVYTKGRV                                                                                          | ACE-inhibitory           |
| P05814 | CSN2 | YPVTQPLAPVHNPI                                                                                    | Antimicrobial            |
| P05814 | CSN2 | ALLLNQELLLNPTHQ<br>IYPVTQPLAPVHNPI                                                                | Antimicrobial            |
| P05814 | CSN2 | LLLNPTHQIYPVTQPL<br>APVHNP                                                                        | Antimicrobial            |
| P05814 | CSN2 | TIESLSS(+79.97)S(+79.<br>97)EESITEYKQ,<br>TIESLSSSEESITEYKQ<br>,<br>TIESLSS(+79.97)SEESI<br>TEYKQ | Increase cellular growth |
| P05814 | CSN2 | VM(+15.99)PVLKSPTI<br>PFFDPQIP,<br>VMPVLKSPTIPFFDPQ<br>IP                                         | Immunomodulatory         |
| P05814 | CSN2 | RETIESLSSSEESIT                                                                                   | Increase cellular growth |
| P05814 | CSN2 | RETIESLSS(+79.97)S(<br>+79.97)EESITE,<br>RETIESLSSSEESITE                                         | Increase cellular growth |
| P05814 | CSN2 | IPFFDPQIP                                                                                         | ACE-inhibitory           |
| P05814 | CSN2 | DLENLHL                                                                                           | ACE-inhibitory           |
| P05814 | CSN2 | LLNQELLLNPTHQIY<br>PVTQPLAPVH                                                                     | Antimicrobial            |
| P05814 | CSN2 | LLLNQELLLNPTHQI<br>YPVTQPLAPVHNPI                                                                 | Antimicrobial            |
| P05814 | CSN2 | LLNQELLLNPTHQIY<br>PVTQPLAPVHNP                                                                   | Antimicrobial            |
| P05814 | CSN2 | EPIPYGFLP                                                                                         | ACE-inhibitory           |
| P05814 | CSN2 | DKIYPSFQPQPLIYP                                                                                   | ACE-inhibitory           |
| P05814 | CSN2 | VMPVLKSPTIPFFDPQ<br>IPKLT,<br>VM(+15.99)PVLKSPTI<br>PFFDPQIPKLT                                   | Immunomodulatory         |



|        |      |                                  |                          |
|--------|------|----------------------------------|--------------------------|
| P05814 | CSN2 | TDLENLHLP                        | ACE-inhibitory           |
| P05814 | CSN2 | TIPFFDPQIPKL                     | Increase cellular growth |
| P05814 | CSN2 | DTVYTKGRVM(+15.9<br>9)           | ACE-inhibitory           |
| P05814 | CSN2 | LNQELLNPETHQIYP<br>VTQ           | Antimicrobial            |
| P05814 | CSN2 | IYPSFQPQLIYP                     | ACE-inhibitory           |
| P05814 | CSN2 | LNQELLNPETHQIYP<br>VTQPLAPVHNP   | Antimicrobial            |
| P05814 | CSN2 | LLNQELLNPETHQIY                  | Antimicrobial            |
| P05814 | CSN2 | NQELLNPETHQIYPV<br>TQPLAPVHN     | Antimicrobial            |
| P05814 | CSN2 | LNQELLNPETHQIYP<br>VTQPLAPVH     | Antimicrobial            |
| P05814 | CSN2 | PVTQPLAPVHNPI                    | Antimicrobial            |
| P05814 | CSN2 | ELLNPETHQIYPVTQP<br>LAPVHN       | Antimicrobial            |
| P05814 | CSN2 | IYPSFQPQLI                       | ACE-inhibitory           |
| P05814 | CSN2 | LKSPTIPFFDPQIP                   | Increase cellular growth |
| P05814 | CSN2 | LNQELLNPETHQIYP<br>VTQP          | Antimicrobial            |
| P05814 | CSN2 | EIPYGFPLQ                        | ACE-inhibitory           |
| P05814 | CSN2 | YPVTQPLAPVHNP                    | Antimicrobial            |
| P05814 | CSN2 | DKIYPSFQPQL                      | ACE-inhibitory           |
| P05814 | CSN2 | LLNQELLNPETHQI<br>YPVTQPLAPVHNPI | Antimicrobial            |
| P05814 | CSN2 | QELLNPETHQIYPVT<br>QPLAPVHNP     | Antimicrobial            |
| P05814 | CSN2 | RVMPVLKSPTIPFFDP<br>QIP          | Immunomodulatory         |
| P05814 | CSN2 | LTDLENLHLP                       | ACE-inhibitory           |
| P05814 | CSN2 | LTDLENLHLPL                      | ACE-inhibitory           |
| P05814 | CSN2 | LENLHLPLP                        | ACE-inhibitory           |
| P05814 | CSN2 | WSVPQPK                          | Antioxidant              |
| P05814 | CSN2 |                                  | ACE-inhibitory           |
| P05814 | CSN2 | LHLPLPL                          | ACE-inhibitory           |
| P05814 | CSN2 | KSPTIPFFDPQIP                    | Increase cellular growth |
| P05814 | CSN2 | PVTQPLAPVHNP                     | Antimicrobial            |
| P05814 | CSN2 | SFQPQLIYPF                       | ACE-inhibitory           |
| P05814 | CSN2 | HQIYPVTQPLAPVHN<br>P             | Antimicrobial            |
| P05814 | CSN2 | PTIPFFDPQIP                      | Increase cellular growth |
| P05814 | CSN2 | QELLNPETHQIYPVT                  | Antimicrobial            |

|        |      |                                                                   |                  |
|--------|------|-------------------------------------------------------------------|------------------|
|        |      | QPLAPVHNPI                                                        |                  |
| P05814 | CSN2 | LNQELLLNPTHQIYP<br>VT                                             | Antimicrobial    |
| P05814 | CSN2 | EHQDKIYPSFQPQPLI<br>YP                                            | ACE-inhibitory   |
| P05814 | CSN2 | GRVMPVLKSPTIPFF<br>DPQIPKL,<br>GRVM(+15.99)PVLKS<br>PTIPFFDPQIPKL | Immunomodulatory |
| P05814 | CSN2 | ENLHLPLPLLQP                                                      | ACE-inhibitory   |
| P05814 | CSN2 | QELLLNPTHQIYPVT                                                   | Antimicrobial    |
| P05814 | CSN2 | IYPSFQPQPLIYYPF                                                   | ACE-inhibitory   |
| P05814 | CSN2 | RVMPVLKSPTIPFFDP<br>QIPK                                          | Immunomodulatory |
| P07498 | CSN3 | NPYVPR                                                            | Antioxidant      |
| P07498 | CSN3 | NNPYVPR                                                           | Antioxidant      |
| P07498 | CSN3 | NPYVPR                                                            | Antioxidant      |
| P07498 | CSN3 | NPAVVRP                                                           | ACE-inhibitory   |
| P07498 | CSN3 | NPAVVRPH                                                          | ACE-inhibitory   |
| P07498 | CSN3 | TYYANPAVVRP                                                       | ACE-inhibitory   |
| P07498 | CSN3 | ANPAVVRPHA                                                        | ACE-inhibitory   |
