# Supplementary material for: Peptidome profiling of human, bovine, and donkey colostrum through label-free quantitative analysis reveals proteolysis of milk proteins
Source: Royal Society of Chemistry journal article supplement (doi:10.1039/d4fo00689e), 2024-01-01
Supplement: d4fo00689e8.xlsx [file d4fo00689e8.xlsx]

## Sheet: Table S6
Table S6. GO analysis of common expressed parent proteins in human colostrum.
Category	GO.ID	GO.Name	Level	FDR	P.Value
Biological processes	GO:0006334	nucleosome assembly	7	0.000143354	1.39411e-08
Biological processes	GO:0019731	antibacterial humoral response	7	0.000143354	2.27095e-08
Biological processes	GO:0006338	chromatin remodeling	5	0.000143354	2.54602e-08
Biological processes	GO:0034728	nucleosome organization	6	0.000188271	4.17971e-08
Biological processes	GO:0043933	protein-containing complex organization	4	0.000283706	7.5581e-08
Biological processes	GO:0065004	protein-DNA complex assembly	6	0.00033252	1.0335e-07
Biological processes	GO:0061844	antimicrobial humoral immune response mediated by antimicrobial peptide	7	0.000349481	1.24139e-07
Biological processes	GO:0016043	cellular component organization	3	0.000368228	1.77525e-07
Biological processes	GO:0071840	cellular component organization or biogenesis	2	0.000368228	2.0418e-07
Biological processes	GO:0002227	innate immune response in mucosa	7	0.000368228	2.12546e-07
Biological processes	GO:0071824	protein-DNA complex subunit organization	5	0.000374184	2.32598e-07
Biological processes	GO:0002385	mucosal immune response	4	0.00047709	4.66032e-07
Biological processes	GO:0065003	protein-containing complex assembly	5	0.000508983	5.25963e-07
Biological processes	GO:0050830	defense response to Gram-positive bacterium	7	0.000508983	5.7746e-07
Biological processes	GO:0022607	cellular component assembly	4	0.000508983	5.81619e-07
Biological processes	GO:0019730	antimicrobial humoral response	6	0.000508983	6.17525e-07
Biological processes	GO:0006959	humoral immune response	3	0.000508983	6.22482e-07
Biological processes	GO:0002251	organ or tissue specific immune response	3	0.000533385	6.86802e-07
Biological processes	GO:0006325	chromatin organization	4	0.000600637	8.04908e-07
Biological processes	GO:0042742	defense response to bacterium	6	0.00111602	1.80304e-06
Biological processes	GO:0150111	regulation of transepithelial transport	5	0.00111602	1.80422e-06
Biological processes	GO:0000018	regulation of DNA recombination	7	0.00111602	1.88299e-06
Biological processes	GO:0030261	chromosome condensation	6	0.00176353	3.13211e-06
Biological processes	GO:0098532	histone H3-K27 trimethylation	12	0.00214619	3.90701e-06
Biological processes	GO:0001738	morphogenesis of a polarized epithelium	5	0.00244394	4.55756e-06
Biological processes	GO:0045910	negative regulation of DNA recombination	8	0.00246489	4.70608e-06
Biological processes	GO:0009617	response to bacterium	5	0.00307752	6.28566e-06
Biological processes	GO:0070734	histone H3-K27 methylation	11	0.00326258	6.80851e-06
Biological processes	GO:0045176	apical protein localization	4	0.0073188	1.7548e-05
Biological processes	GO:0045087	innate immune response	6	0.00774744	1.96077e-05
Biological processes	GO:0035633	maintenance of blood-brain barrier	6	0.0115383	2.97141e-05
Biological processes	GO:0044419	biological process involved in interspecies interaction between organisms	1	0.0189665	5.26512e-05
Biological processes	GO:0150105	protein localization to cell-cell junction	5	0.0189665	5.38964e-05
Biological processes	GO:0021762	substantia nigra development	4	0.0189665	5.38964e-05
Biological processes	GO:0080182	histone H3-K4 trimethylation	12	0.019484	5.6232e-05
Biological processes	GO:0001895	retina homeostasis	6	0.0306117	9.10657e-05
Biological processes	GO:0051053	negative regulation of DNA metabolic process	7	0.0342935	0.000105814
Biological processes	GO:1902806	regulation of cell cycle G1/S phase transition	7	0.0355632	0.000112112
Biological processes	GO:0098542	defense response to other organism	5	0.0499221	0.000164028
Biological processes	GO:0071168	protein localization to chromatin	7	0.0548008	0.000189791
Biological processes	GO:0070527	platelet aggregation	5	0.0548008	0.000189791
Biological processes	GO:0048857	neural nucleus development	3	0.0565935	0.000198512
Biological processes	GO:0018023	peptidyl-lysine trimethylation	10	0.06096	0.000216535
Biological processes	GO:0031640	killing of cells of another organism	3	0.0623152	0.000225836
Biological processes	GO:0051623	positive regulation of norepinephrine uptake	6	0.0623152	0.000230468
Biological processes	GO:0051052	regulation of DNA metabolic process	6	0.0623152	0.000232416
Biological processes	GO:0051568	histone H3-K4 methylation	11	0.0729271	0.000275233
Biological processes	GO:0050896	response to stimulus	1	0.0827375	0.000319906
Biological processes	GO:0051707	response to other organism	4	0.0963016	0.000380554
Biological processes	GO:0072749	cellular response to cytochalasin B	6	0.109264	0.000460886
Biological processes	GO:0046745	viral capsid secondary envelopment	2	0.109264	0.000460886
Biological processes	GO:1901328	response to cytochalasin B	5	0.109264	0.000460886
Biological processes	GO:0034109	homotypic cell-cell adhesion	4	0.117622	0.000506585
Biological processes	GO:0009605	response to external stimulus	2	0.117958	0.00051327
Biological processes	GO:0048488	synaptic vesicle endocytosis	7	0.12703	0.000564028
Biological processes	GO:0006955	immune response	2	0.131541	0.000589894
Biological processes	GO:0140238	presynaptic endocytosis	6	0.132805	0.000601462
Biological processes	GO:0009893	positive regulation of metabolic process	4	0.133351	0.000609855
Biological processes	GO:0043207	response to external biotic stimulus	3	0.148945	0.000701012
Biological processes	GO:0006952	defense response	3	0.152568	0.00073161
Biological processes	GO:0009607	response to biotic stimulus	2	0.170285	0.000831692
Biological processes	GO:0051173	positive regulation of nitrogen compound metabolic process	5	0.171812	0.000846777
Biological processes	GO:0110053	regulation of actin filament organization	8	0.180453	0.000899744
Biological processes	GO:0051621	regulation of norepinephrine uptake	5	0.180453	0.00092157
Biological processes	GO:0061644	protein localization to CENP-A containing chromatin	8	0.180453	0.00092157
Biological processes	GO:0034968	histone lysine methylation	10	0.180453	0.000933607
Biological processes	GO:0018205	peptidyl-lysine modification	8	0.180453	0.000940404
Biological processes	GO:1902414	protein localization to cell junction	4	0.180453	0.000952546
Biological processes	GO:0008104	protein localization	3	0.180453	0.000953465
Biological processes	GO:0033036	macromolecule localization	2	0.187881	0.00100105
Biological processes	GO:0032487	regulation of Rap protein signal transduction	9	0.209207	0.00115184
Biological processes	GO:0001906	cell killing	2	0.220944	0.00122627
Biological processes	GO:0050829	defense response to Gram-negative bacterium	7	0.223225	0.00125875
Biological processes	GO:0030837	negative regulation of actin filament polymerization	11	0.235235	0.00134736
Biological processes	GO:1905271	regulation of proton-transporting ATP synthase activity, rotational mechanism	9	0.237608	0.00138205
Biological processes	GO:1905273	positive regulation of proton-transporting ATP synthase activity, rotational mechanism	10	0.237608	0.00138205
Biological processes	GO:0034502	protein localization to chromosome	6	0.243526	0.00142729
Biological processes	GO:0018022	peptidyl-lysine methylation	9	0.24761	0.00146222
Biological processes	GO:0051276	chromosome organization	5	0.266989	0.00160953
Biological processes	GO:1902396	protein localization to bicellular tight junction	6	0.266989	0.00161222
Biological processes	GO:1903392	negative regulation of adherens junction organization	6	0.266989	0.00161222
Biological processes	GO:0010468	regulation of gene expression	5	0.270125	0.00164315
Biological processes	GO:0032272	negative regulation of protein polymerization	7	0.272202	0.00166787
Biological processes	GO:0099003	vesicle-mediated transport in synapse	5	0.272269	0.00168037
Biological processes	GO:1901987	regulation of cell cycle phase transition	6	0.283554	0.0017752
Biological processes	GO:0032956	regulation of actin cytoskeleton organization	7	0.28941	0.00183756
Biological processes	GO:0016570	histone modification	7	0.289681	0.00185215
Biological processes	GO:0016571	histone methylation	9	0.293022	0.00188652
Biological processes	GO:0010604	positive regulation of macromolecule metabolic process	5	0.293384	0.00190188
Biological processes	GO:0032231	regulation of actin filament bundle assembly	9	0.313253	0.00206244
Biological processes	GO:0071896	protein localization to adherens junction	6	0.313253	0.00207241
Biological processes	GO:1902903	regulation of supramolecular fiber organization	5	0.318593	0.00212188
Biological processes	GO:0051128	regulation of cellular component organization	4	0.325457	0.00218204
Biological processes	GO:0060255	regulation of macromolecule metabolic process	4	0.333763	0.00225255
Biological processes	GO:0032970	regulation of actin filament-based process	4	0.341524	0.00233526
Biological processes	GO:1904896	ESCRT complex disassembly	6	0.363277	0.00253239
Biological processes	GO:1904903	ESCRT III complex disassembly	7	0.363277	0.00253239
Biological processes	GO:0007043	cell-cell junction assembly	6	0.373106	0.00265061
Biological processes	GO:0099188	postsynaptic cytoskeleton organization	6	0.381673	0.00276231
Biological processes	GO:0098974	postsynaptic actin cytoskeleton organization	7	0.381673	0.00276231
Biological processes	GO:2000045	regulation of G1/S transition of mitotic cell cycle	8	0.394373	0.00288924
Biological processes	GO:0007253	cytoplasmic sequestering of NF-kappaB	13	0.401129	0.00299217
Biological processes	GO:1902037	negative regulation of hematopoietic stem cell differentiation	7	0.401129	0.00299217
Biological processes	GO:1903026	negative regulation of RNA polymerase II regulatory region sequence-specific DNA binding	7	0.401129	0.00299217
Biological processes	GO:0051100	negative regulation of binding	4	0.443239	0.00332597
Biological processes	GO:0030307	positive regulation of cell growth	6	0.445242	0.00336076
Biological processes	GO:0009838	abscission	2	0.453461	0.00345176
Biological processes	GO:0030335	positive regulation of cell migration	7	0.486363	0.00373594
Biological processes	GO:0008213	protein alkylation	7	0.490358	0.00381017
Biological processes	GO:0006479	protein methylation	8	0.490358	0.00381017
Biological processes	GO:2001171	positive regulation of ATP biosynthetic process	11	0.523612	0.00414075
Biological processes	GO:1903391	regulation of adherens junction organization	5	0.523612	0.00414075
Biological processes	GO:2000147	positive regulation of cell motility	6	0.523612	0.0041978
Biological processes	GO:0006355	regulation of transcription, DNA-templated	9	0.523612	0.00422249
Biological processes	GO:1903506	regulation of nucleic acid-templated transcription	8	0.523612	0.00423732
Biological processes	GO:0031333	negative regulation of protein-containing complex assembly	6	0.523612	0.00424704
Biological processes	GO:2001141	regulation of RNA biosynthetic process	7	0.523612	0.00428704
Biological processes	GO:0006357	regulation of transcription by RNA polymerase II	10	0.523612	0.00429265
Biological processes	GO:0019222	regulation of metabolic process	3	0.523612	0.00430105
Biological processes	GO:0051272	positive regulation of cellular component movement	5	0.526355	0.00435363
Biological processes	GO:0002376	immune system process	1	0.535766	0.00449469
Biological processes	GO:0040017	positive regulation of locomotion	4	0.535766	0.00449604
Biological processes	GO:0045792	negative regulation of cell size	6	0.54525	0.00459984
Biological processes	GO:0051171	regulation of nitrogen compound metabolic process	4	0.547831	0.00464593
Biological processes	GO:0071495	cellular response to endogenous stimulus	3	0.563864	0.00480694
Biological processes	GO:0001894	tissue homeostasis	5	0.568414	0.00487096
Biological processes	GO:0006996	organelle organization	4	0.578886	0.0049864
Biological processes	GO:0030833	regulation of actin filament polymerization	10	0.60158	0.0052086
Biological processes	GO:2000643	positive regulation of early endosome to late endosome transport	8	0.624306	0.0055174
Biological processes	GO:0051493	regulation of cytoskeleton organization	6	0.624306	0.00554396
Biological processes	GO:0045216	cell-cell junction organization	5	0.627477	0.00564544
Biological processes	GO:0080090	regulation of primary metabolic process	4	0.627477	0.00565571
Biological processes	GO:0071310	cellular response to organic substance	4	0.628284	0.00569985
Biological processes	GO:0071169	establishment of protein localization to chromatin	8	0.628284	0.00574667
Biological processes	GO:0051351	positive regulation of ligase activity	5	0.628284	0.00574667
Biological processes	GO:1902904	negative regulation of supramolecular fiber organization	6	0.645443	0.00596094
Biological processes	GO:0051340	regulation of ligase activity	4	0.659199	0.00620505
Biological processes	GO:0034333	adherens junction assembly	7	0.659199	0.00620505
Biological processes	GO:0048672	positive regulation of collateral sprouting	10	0.659199	0.00620505
Biological processes	GO:0008064	regulation of actin polymerization or depolymerization	9	0.664061	0.00628438
Biological processes	GO:0033043	regulation of organelle organization	5	0.664061	0.00630979
Biological processes	GO:0051494	negative regulation of cytoskeleton organization	7	0.665679	0.00635472
Biological processes	GO:0034111	negative regulation of homotypic cell-cell adhesion	7	0.670881	0.00643417
Biological processes	GO:0030832	regulation of actin filament length	8	0.674257	0.00649648
Biological processes	GO:0042994	cytoplasmic sequestering of transcription factor	12	0.688392	0.00666324
Biological processes	GO:0051574	positive regulation of histone H3-K9 methylation	11	0.702386	0.00689226
Biological processes	GO:0051252	regulation of RNA metabolic process	6	0.704362	0.00694291
Biological processes	GO:0031325	positive regulation of cellular metabolic process	5	0.706015	0.00703299
Biological processes	GO:0050821	protein stabilization	4	0.706015	0.00705325
Biological processes	GO:1903025	regulation of RNA polymerase II regulatory region sequence-specific DNA binding	6	0.74866	0.00757901
Biological processes	GO:0006950	response to stress	2	0.758007	0.00770729
Biological processes	GO:1902965	regulation of protein localization to early endosome	6	0.761246	0.00780783
Biological processes	GO:1902966	positive regulation of protein localization to early endosome	7	0.761246	0.00780783
Biological processes	GO:1903651	positive regulation of cytoplasmic transport	7	0.778876	0.00803659
Biological processes	GO:0010556	regulation of macromolecule biosynthetic process	5	0.778876	0.00818438
Biological processes	GO:0060249	anatomical structure homeostasis	4	0.778876	0.0082561
Biological processes	GO:0036258	multivesicular body assembly	8	0.778876	0.00826531
Biological processes	GO:1902036	regulation of hematopoietic stem cell differentiation	6	0.778876	0.00826531
Biological processes	GO:1901533	negative regulation of hematopoietic progenitor cell differentiation	6	0.778876	0.00826531
Biological processes	GO:0032870	cellular response to hormone stimulus	5	0.787249	0.00838915
Biological processes	GO:0036120	cellular response to platelet-derived growth factor stimulus	6	0.787249	0.00849398
Biological processes	GO:2001028	positive regulation of endothelial cell chemotaxis	10	0.787249	0.00849398
Biological processes	GO:2001169	regulation of ATP biosynthetic process	10	0.792139	0.0087226
Biological processes	GO:0036257	multivesicular body organization	7	0.792139	0.0087226
Biological processes	GO:0048668	collateral sprouting	4	0.792139	0.0087226
Biological processes	GO:0071391	cellular response to estrogen stimulus	6	0.792139	0.0087226
Biological processes	GO:0045927	positive regulation of growth	4	0.79296	0.00876685
Biological processes	GO:0010564	regulation of cell cycle process	5	0.80053	0.00888609
Biological processes	GO:1905668	positive regulation of protein localization to endosome	6	0.823685	0.00917969
Biological processes	GO:0032271	regulation of protein polymerization	6	0.832914	0.00931952
Biological processes	GO:0034329	cell junction assembly	5	0.849683	0.00954488
Biological processes	GO:0032717	negative regulation of interleukin-8 production	8	0.84972	0.00963658
Biological processes	GO:0036119	response to platelet-derived growth factor	5	0.84972	0.00963658
Biological processes	GO:1905666	regulation of protein localization to endosome	5	0.864507	0.00986494
Biological processes	GO:0031326	regulation of cellular biosynthetic process	5	0.87096	0.0100231
Biological processes	GO:0022898	regulation of transmembrane transporter activity	6	0.87096	0.0100319
Biological processes	GO:0097067	cellular response to thyroid hormone stimulus	6	0.87096	0.0100933
Biological processes	GO:0010737	protein kinase A signaling	6	0.887258	0.0103215
Biological processes	GO:0070199	establishment of protein localization to chromosome	7	0.900006	0.0105498
Biological processes	GO:2000678	negative regulation of transcription regulatory region DNA binding	6	0.900006	0.0105498
Biological processes	GO:0019219	regulation of nucleobase-containing compound metabolic process	5	0.915165	0.0107681
Biological processes	GO:0009889	regulation of biosynthetic process	4	0.921635	0.0108851
Biological processes	GO:0032409	regulation of transporter activity	3	0.92348	0.0109479
Biological processes	GO:0030155	regulation of cell adhesion	4	0.930202	0.0110727
Biological processes	GO:0000122	negative regulation of transcription by RNA polymerase II	11	0.930202	0.0111603
Biological processes	GO:0010804	negative regulation of tumor necrosis factor-mediated signaling pathway	8	0.930202	0.0112341
Biological processes	GO:1900373	positive regulation of purine nucleotide biosynthetic process	10	0.930202	0.0112341
Biological processes	GO:0030810	positive regulation of nucleotide biosynthetic process	9	0.930202	0.0112341
Biological processes	GO:0048522	positive regulation of cellular process	4	0.958058	0.0116131
Biological processes	GO:0009719	response to endogenous stimulus	2	0.960205	0.0117244
Biological processes	GO:0051220	cytoplasmic sequestering of protein	4	0.972529	0.011918
Biological processes	GO:0070887	cellular response to chemical stimulus	3	0.983745	0.0120992
Biological processes	GO:0042989	sequestering of actin monomers	12	0.997804	0.0123737
Biological processes	GO:0043414	macromolecule methylation	5	0.997804	0.012405
Biological processes	GO:2000819	regulation of nucleotide-excision repair	8	1	0.0126015
Biological processes	GO:2001026	regulation of endothelial cell chemotaxis	9	1	0.0126015
Biological processes	GO:0048670	regulation of collateral sprouting	9	1	0.0126015
Biological processes	GO:0051050	positive regulation of transport	5	1	0.0126328
Biological processes	GO:0002009	morphogenesis of an epithelium	4	1	0.0126933
Biological processes	GO:2000641	regulation of early endosome to late endosome transport	7	1	0.0128292
Biological processes	GO:0097066	response to thyroid hormone	5	1	0.0128292
Biological processes	GO:0051570	regulation of histone H3-K9 methylation	10	1	0.0128292
Biological processes	GO:0010155	regulation of proton transport	8	1	0.0130569
Biological processes	GO:0019076	viral release from host cell	7	1	0.0144219
Biological processes	GO:1901223	negative regulation of NIK/NF-kappaB signaling	8	1	0.0144219
Biological processes	GO:0035891	exit from host cell	6	1	0.0144219
Biological processes	GO:0035890	exit from host	5	1	0.0144219
Biological processes	GO:1901990	regulation of mitotic cell cycle phase transition	7	1	0.014724
Biological processes	GO:0065008	regulation of biological quality	2	1	0.0147698
Biological processes	GO:0032535	regulation of cellular component size	4	1	0.0150349
Biological processes	GO:0048523	negative regulation of cellular process	4	1	0.0151705
Biological processes	GO:1903580	positive regulation of ATP metabolic process	5	1	0.0160122
Biological processes	GO:0044092	negative regulation of molecular function	3	1	0.0160831
Biological processes	GO:0031328	positive regulation of cellular biosynthetic process	6	1	0.0161181
Biological processes	GO:1900027	regulation of ruffle assembly	8	1	0.0162391
Biological processes	GO:0018193	peptidyl-amino acid modification	7	1	0.0162465
Biological processes	GO:0051049	regulation of transport	4	1	0.0166549
Biological processes	GO:0051098	regulation of binding	3	1	0.0168134
Biological processes	GO:0031647	regulation of protein stability	3	1	0.0169594
Biological processes	GO:0032259	methylation	2	1	0.0170327
Biological processes	GO:1902459	positive regulation of stem cell population maintenance	5	1	0.0171466
Biological processes	GO:0009891	positive regulation of biosynthetic process	5	1	0.017216
Biological processes	GO:0030334	regulation of cell migration	6	1	0.0173035
Biological processes	GO:0070316	regulation of G0 to G1 transition	6	1	0.0173733
Biological processes	GO:0071459	protein localization to chromosome, centromeric region	7	1	0.0178266
Biological processes	GO:0043968	histone H2A acetylation	12	1	0.0178266
Biological processes	GO:0045935	positive regulation of nucleobase-containing compound metabolic process	6	1	0.017974
Biological processes	GO:0034260	negative regulation of GTPase activity	6	1	0.0180532
Biological processes	GO:2000737	negative regulation of stem cell differentiation	6	1	0.0180532
Biological processes	GO:0061028	establishment of endothelial barrier	6	1	0.0182797
Biological processes	GO:0034110	regulation of homotypic cell-cell adhesion	6	1	0.0182797
Biological processes	GO:0048729	tissue morphogenesis	3	1	0.018678
Biological processes	GO:1903649	regulation of cytoplasmic transport	6	1	0.0187327
Biological processes	GO:0051016	barbed-end actin filament capping	13	1	0.0187327
Biological processes	GO:0001558	regulation of cell growth	5	1	0.0195251
Biological processes	GO:2000145	regulation of cell motility	5	1	0.0198578
Biological processes	GO:1901532	regulation of hematopoietic progenitor cell differentiation	5	1	0.0198641
Biological processes	GO:0051179	localization	1	1	0.0200641
Biological processes	GO:1900371	regulation of purine nucleotide biosynthetic process	9	1	0.0200903
Biological processes	GO:0030808	regulation of nucleotide biosynthetic process	8	1	0.0203164
Biological processes	GO:0001885	endothelial cell development	5	1	0.0205424
Biological processes	GO:0051716	cellular response to stimulus	2	1	0.0208855
Biological processes	GO:1900544	positive regulation of purine nucleotide metabolic process	9	1	0.0212202
Biological processes	GO:0045981	positive regulation of nucleotide metabolic process	8	1	0.0212202
Biological processes	GO:0045663	positive regulation of myoblast differentiation	6	1	0.0214461
Biological processes	GO:0040012	regulation of locomotion	3	1	0.0218516
Biological processes	GO:0045214	sarcomere organization	8	1	0.0218976
Biological processes	GO:0010639	negative regulation of organelle organization	6	1	0.0221625
Biological processes	GO:0006897	endocytosis	5	1	0.0222858
Biological processes	GO:1900087	positive regulation of G1/S transition of mitotic cell cycle	9	1	0.022349
Biological processes	GO:0044087	regulation of cellular component biogenesis	4	1	0.0228999
Biological processes	GO:0010803	regulation of tumor necrosis factor-mediated signaling pathway	7	1	0.0230256
Biological processes	GO:0051270	regulation of cellular component movement	4	1	0.0230773
Biological processes	GO:0032968	positive regulation of transcription elongation from RNA polymerase II promoter	12	1	0.0232511
Biological processes	GO:0030036	actin cytoskeleton organization	6	1	0.0237873
Biological processes	GO:0051123	RNA polymerase II preinitiation complex assembly	8	1	0.0248279
Biological processes	GO:0010033	response to organic substance	3	1	0.0257967
Biological processes	GO:0009987	cellular process	1	1	0.0259366
Biological processes	GO:0048519	negative regulation of biological process	3	1	0.0260266
Biological processes	GO:0034330	cell junction organization	4	1	0.0266462
Biological processes	GO:0043392	negative regulation of DNA binding	5	1	0.0268516
Biological processes	GO:0051726	regulation of cell cycle	4	1	0.027053
Biological processes	GO:0045892	negative regulation of transcription, DNA-templated	10	1	0.028257
Biological processes	GO:1903507	negative regulation of nucleic acid-templated transcription	9	1	0.0283815
Biological processes	GO:1905168	positive regulation of double-strand break repair via homologous recombination	10	1	0.0284229
Biological processes	GO:0090066	regulation of anatomical structure size	3	1	0.0284441
Biological processes	GO:1902679	negative regulation of RNA biosynthetic process	8	1	0.0284563
Biological processes	GO:0034613	cellular protein localization	4	1	0.0285813
Biological processes	GO:0090303	positive regulation of wound healing	7	1	0.0286472
Biological processes	GO:0052126	movement in host environment	4	1	0.0290956
Biological processes	GO:0070727	cellular macromolecule localization	3	1	0.0292105
Biological processes	GO:0009725	response to hormone	4	1	0.0293151
Biological processes	GO:0043254	regulation of protein-containing complex assembly	5	1	0.0293612
Biological processes	GO:1902808	positive regulation of cell cycle G1/S phase transition	8	1	0.0295438
Biological processes	GO:0060261	positive regulation of transcription initiation from RNA polymerase II promoter	12	1	0.0297679
Biological processes	GO:0031062	positive regulation of histone methylation	10	1	0.0297679
Biological processes	GO:0070897	transcription preinitiation complex assembly	7	1	0.0299919
Biological processes	GO:0032786	positive regulation of DNA-templated transcription, elongation	11	1	0.0302158
Biological processes	GO:0043627	response to estrogen	5	1	0.0302158
Biological processes	GO:0034605	cellular response to heat	5	1	0.0304397
Biological processes	GO:0061951	establishment of protein localization to plasma membrane	7	1	0.0306635
Biological processes	GO:0033209	tumor necrosis factor-mediated signaling pathway	7	1	0.0306635
Biological processes	GO:2000677	regulation of transcription regulatory region DNA binding	5	1	0.0308873
Biological processes	GO:0043536	positive regulation of blood vessel endothelial cell migration	10	1	0.031111
Biological processes	GO:0034332	adherens junction organization	6	1	0.0313347
Biological processes	GO:2000036	regulation of stem cell population maintenance	4	1	0.031782
Biological processes	GO:0022407	regulation of cell-cell adhesion	5	1	0.0318012
Biological processes	GO:0051893	regulation of focal adhesion assembly	7	1	0.032229
Biological processes	GO:0090109	regulation of cell-substrate junction assembly	6	1	0.032229
Biological processes	GO:0007346	regulation of mitotic cell cycle	5	1	0.0323755
Biological processes	GO:0030029	actin filament-based process	2	1	0.0325678
Biological processes	GO:0120192	tight junction assembly	7	1	0.0326758
Biological processes	GO:1903036	positive regulation of response to wounding	6	1	0.0335689
Biological processes	GO:0060260	regulation of transcription initiation from RNA polymerase II promoter	11	1	0.0346842
Biological processes	GO:0051701	biological process involved in interaction with host	3	1	0.0346842
Biological processes	GO:2000144	positive regulation of DNA-templated transcription, initiation	11	1	0.0346842
Biological processes	GO:0120193	tight junction organization	6	1	0.0349071
Biological processes	GO:0150116	regulation of cell-substrate junction organization	5	1	0.0353528
Biological processes	GO:0048518	positive regulation of biological process	3	1	0.0356307
Biological processes	GO:0051253	negative regulation of RNA metabolic process	7	1	0.0359721
Biological processes	GO:2001259	positive regulation of cation channel activity	9	1	0.036021
Biological processes	GO:0051693	actin filament capping	12	1	0.0364662
Biological processes	GO:0007032	endosome organization	6	1	0.0364662
Biological processes	GO:0031323	regulation of cellular metabolic process	4	1	0.0375226
Biological processes	GO:0001960	negative regulation of cytokine-mediated signaling pathway	7	1	0.0375783
Biological processes	GO:0043967	histone H4 acetylation	12	1	0.0384671
Biological processes	GO:0060761	negative regulation of response to cytokine stimulus	5	1	0.0386892
Biological processes	GO:0030835	negative regulation of actin filament depolymerization	11	1	0.0389112
Biological processes	GO:1902807	negative regulation of cell cycle G1/S phase transition	8	1	0.0391332
Biological processes	GO:0045661	regulation of myoblast differentiation	5	1	0.0395771
Biological processes	GO:0080134	regulation of response to stress	4	1	0.0403266
Biological processes	GO:0034243	regulation of transcription elongation from RNA polymerase II promoter	11	1	0.0404641
Biological processes	GO:2000142	regulation of DNA-templated transcription, initiation	10	1	0.0404641
Biological processes	GO:0010558	negative regulation of macromolecule biosynthetic process	6	1	0.0409311
Biological processes	GO:0031060	regulation of histone methylation	9	1	0.0417933
Biological processes	GO:2000736	regulation of stem cell differentiation	5	1	0.0417933
Biological processes	GO:0040008	regulation of growth	3	1	0.0430233
Biological processes	GO:0007517	muscle organ development	4	1	0.0435628
Biological processes	GO:0032677	regulation of interleukin-8 production	7	1	0.044888
Biological processes	GO:1900542	regulation of purine nucleotide metabolic process	8	1	0.0455499
Biological processes	GO:0031327	negative regulation of cellular biosynthetic process	6	1	0.0457117
Biological processes	GO:0098609	cell-cell adhesion	3	1	0.045964
Biological processes	GO:0006140	regulation of nucleotide metabolic process	7	1	0.0459909
Biological processes	GO:0032507	maintenance of protein location in cell	4	1	0.0466521
Biological processes	GO:0034762	regulation of transmembrane transport	5	1	0.0467385
Biological processes	GO:0045934	negative regulation of nucleobase-containing compound metabolic process	6	1	0.0469741
Biological processes	GO:0030834	regulation of actin filament depolymerization	10	1	0.0473129
Biological processes	GO:0045893	positive regulation of transcription, DNA-templated	10	1	0.0474317
Biological processes	GO:1903508	positive regulation of nucleic acid-templated transcription	9	1	0.0474317
Biological processes	GO:0050772	positive regulation of axonogenesis	9	1	0.047533
Biological processes	GO:0009890	negative regulation of biosynthetic process	5	1	0.0477598
Biological processes	GO:0045184	establishment of protein localization	4	1	0.0478914
Biological processes	GO:1902680	positive regulation of RNA biosynthetic process	8	1	0.0479244
Biological processes	GO:1903578	regulation of ATP metabolic process	4	1	0.0499516
Molecular functions	GO:0030527	structural constituent of chromatin	2	0.000467862	4.36244e-07
Molecular functions	GO:0031492	nucleosomal DNA binding	6	0.000508983	6.32783e-07
Molecular functions	GO:0005198	structural molecule activity	1	0.000600637	8.26736e-07
Molecular functions	GO:0098973	structural constituent of postsynaptic actin cytoskeleton	4	0.00111602	1.80422e-06
Molecular functions	GO:0046982	protein heterodimerization activity	4	0.00111602	1.85074e-06
Molecular functions	GO:1901363	heterocyclic compound binding	2	0.00300555	6.00523e-06
Molecular functions	GO:0097159	organic cyclic compound binding	2	0.00329374	7.01978e-06
Molecular functions	GO:0031491	nucleosome binding	3	0.00364466	7.92952e-06
Molecular functions	GO:0003676	nucleic acid binding	3	0.00597045	1.405e-05
Molecular functions	GO:0099186	structural constituent of postsynapse	3	0.0156192	4.0917e-05
Molecular functions	GO:0031490	chromatin DNA binding	5	0.0189665	5.36129e-05
Molecular functions	GO:0098918	structural constituent of synapse	2	0.0332135	0.00010028
Molecular functions	GO:0005515	protein binding	2	0.0342935	0.000106587
Molecular functions	GO:0003677	DNA binding	4	0.0454894	0.000145424
Molecular functions	GO:0019899	enzyme binding	3	0.051303	0.000170843
Molecular functions	GO:0003723	RNA binding	4	0.0827375	0.000323279
Molecular functions	GO:0046983	protein dimerization activity	3	0.0984815	0.000393541
Molecular functions	GO:0003682	chromatin binding	2	0.136538	0.000630492
Molecular functions	GO:0090541	MIT domain binding	4	0.209207	0.00115184
Molecular functions	GO:0051117	ATPase binding	4	0.221118	0.00123705
Molecular functions	GO:0005200	structural constituent of cytoskeleton	2	0.280489	0.00174356
Molecular functions	GO:0030957	Tat protein binding	6	0.523612	0.00414075
Molecular functions	GO:0045296	cadherin binding	4	0.633744	0.00582475
Molecular functions	GO:0005488	binding	1	0.705491	0.00698537
Molecular functions	GO:0050998	nitric-oxide synthase binding	4	0.732477	0.00735014
Molecular functions	GO:0005522	profilin binding	3	0.74866	0.00757901
Molecular functions	GO:0044877	protein-containing complex binding	2	0.778876	0.00821688
Molecular functions	GO:0032183	SUMO binding	4	0.960205	0.0116901
Molecular functions	GO:0048156	tau protein binding	4	1	0.016693
Molecular functions	GO:0097718	disordered domain specific binding	4	1	0.0196379
Molecular functions	GO:0003785	actin monomer binding	5	1	0.0198641
Molecular functions	GO:0042802	identical protein binding	3	1	0.0242453
Molecular functions	GO:0001530	lipopolysaccharide binding	3	1	0.0250529
Molecular functions	GO:0019894	kinesin binding	4	1	0.0277498
Molecular functions	GO:0140662	ATP-dependent protein folding chaperone	2	1	0.0284229
Molecular functions	GO:0050839	cell adhesion molecule binding	3	1	0.0307122
Molecular functions	GO:0051018	protein kinase A binding	3	1	0.0393552
Molecular functions	GO:0008092	cytoskeletal protein binding	3	1	0.043053
Molecular functions	GO:0044183	protein folding chaperone	1	1	0.0444465
Molecular functions	GO:0047485	protein N-terminus binding	3	1	0.0495123
Cellular components	GO:0000786	nucleosome	3	0.000143354	2.15996e-08
Cellular components	GO:0032993	protein-DNA complex	2	0.000368228	2.00849e-07
Cellular components	GO:0043227	membrane-bounded organelle	3	0.000368228	2.01711e-07
Cellular components	GO:0044815	DNA packaging complex	2	0.00045203	3.01059e-07
Cellular components	GO:0005615	extracellular space	2	0.000461112	3.45715e-07
Cellular components	GO:0070062	extracellular exosome	6	0.000461112	3.53428e-07
Cellular components	GO:1903561	extracellular vesicle	5	0.000461112	4.02235e-07
Cellular components	GO:0043230	extracellular organelle	3	0.000461112	4.09477e-07
Cellular components	GO:0065010	extracellular membrane-bounded organelle	4	0.000461112	4.09477e-07
Cellular components	GO:0005634	nucleus	5	0.000697199	9.90603e-07
Cellular components	GO:0098871	postsynaptic actin cytoskeleton	7	0.000718486	1.05275e-06
Cellular components	GO:0043226	organelle	2	0.00129326	2.23946e-06
Cellular components	GO:0097433	dense body	2	0.00269138	5.258e-06
Cellular components	GO:0099571	postsynaptic cytoskeleton	6	0.00385503	8.55836e-06
Cellular components	GO:0043229	intracellular organelle	3	0.00534219	1.20971e-05
Cellular components	GO:0043231	intracellular membrane-bounded organelle	4	0.00543514	1.2549e-05
Cellular components	GO:0044305	calyx of Held	4	0.00773743	1.88952e-05
Cellular components	GO:0032991	protein-containing complex	1	0.00774744	1.95356e-05
Cellular components	GO:0000785	chromatin	2	0.0187237	4.98812e-05
Cellular components	GO:0005829	cytosol	2	0.0228538	6.69724e-05
Cellular components	GO:0005654	nucleoplasm	2	0.0499221	0.000162675
Cellular components	GO:0043296	apical junction complex	5	0.0548008	0.000189791
Cellular components	GO:0099143	presynaptic actin cytoskeleton	7	0.0623152	0.000230468
Cellular components	GO:0031982	vesicle	4	0.0736395	0.000281191
Cellular components	GO:0000791	euchromatin	3	0.100741	0.000407045
Cellular components	GO:0120220	basal body patch	2	0.109264	0.000460886
Cellular components	GO:0043679	axon terminus	3	0.115589	0.000492697
Cellular components	GO:0072562	blood microparticle	2	0.12703	0.000564028
Cellular components	GO:0005925	focal adhesion	5	0.144043	0.000671545
Cellular components	GO:0030055	cell-substrate junction	4	0.152568	0.000729334
Cellular components	GO:0044306	neuron projection terminus	2	0.159409	0.000771494
Cellular components	GO:0000792	heterochromatin	3	0.180453	0.000952546
Cellular components	GO:0098685	Schaffer collateral - CA1 synapse	4	0.199173	0.00107006
Cellular components	GO:0043505	CENP-A containing nucleosome	4	0.209207	0.00115184
Cellular components	GO:0005884	actin filament	6	0.231165	0.00131379
Cellular components	GO:0030863	cortical cytoskeleton	6	0.286739	0.00180787
Cellular components	GO:0051286	cell tip	3	0.313253	0.00207241
Cellular components	GO:0140092	bBAF complex	5	0.338923	0.00230242
Cellular components	GO:0070161	anchoring junction	3	0.347189	0.00238941
Cellular components	GO:0005856	cytoskeleton	5	0.364487	0.00255701
Cellular components	GO:0034774	secretory granule lumen	6	0.37105	0.00261953
Cellular components	GO:0060205	cytoplasmic vesicle lumen	5	0.381673	0.00276075
Cellular components	GO:0031983	vesicle lumen	4	0.385704	0.00280861
Cellular components	GO:0005911	cell-cell junction	4	0.453461	0.00346307
Cellular components	GO:0060187	cell pole	2	0.526355	0.00437032
Cellular components	GO:0030496	midbody	2	0.615865	0.00535963
Cellular components	GO:0140288	GBAF complex	5	0.624306	0.0055174
Cellular components	GO:0016586	RSC-type complex	5	0.624306	0.0055174
Cellular components	GO:0005912	adherens junction	5	0.627477	0.00560102
Cellular components	GO:0030027	lamellipodium	4	0.657188	0.00609859
Cellular components	GO:0043232	intracellular non-membrane-bounded organelle	4	0.693417	0.00676088
Cellular components	GO:0043228	non-membrane-bounded organelle	3	0.693417	0.00677346
Cellular components	GO:0015629	actin cytoskeleton	6	0.778876	0.00809772
Cellular components	GO:0035060	brahma complex	5	0.787249	0.00849398
Cellular components	GO:0099569	presynaptic cytoskeleton	6	0.792139	0.0087226
Cellular components	GO:0098793	presynapse	2	0.84972	0.00965848
Cellular components	GO:0071564	npBAF complex	5	0.87096	0.0100933
Cellular components	GO:0071565	nBAF complex	5	0.983993	0.0121459
Cellular components	GO:0090543	Flemming body	2	1	0.0151037
Cellular components	GO:0031093	platelet alpha granule lumen	7	1	0.0153309
Cellular components	GO:0070847	core mediator complex	4	1	0.0155581
Cellular components	GO:0031941	filamentous actin	2	1	0.0178266
Cellular components	GO:0030054	cell junction	2	1	0.0199471
Cellular components	GO:0071944	cell periphery	2	1	0.0200903
Cellular components	GO:0035578	azurophil granule lumen	7	1	0.0207684
Cellular components	GO:0071339	MLL1 complex	7	1	0.0212202
Cellular components	GO:0044665	MLL1/2 complex	6	1	0.0218976
Cellular components	GO:0035267	NuA4 histone acetyltransferase complex	9	1	0.0232511
Cellular components	GO:0043189	H4/H2A histone acetyltransferase complex	8	1	0.0232511
Cellular components	GO:0016514	SWI/SNF complex	5	1	0.0246028
Cellular components	GO:0030315	T-tubule	2	1	0.0259527
Cellular components	GO:0032154	cleavage furrow	4	1	0.0281986
Cellular components	GO:0030016	myofibril	6	1	0.0315584
Cellular components	GO:1902562	H4 histone acetyltransferase complex	7	1	0.0344613
Cellular components	GO:0043292	contractile fiber	5	1	0.0349071
Cellular components	GO:0110165	cellular anatomical entity	1	1	0.0351701
Cellular components	GO:0016592	mediator complex	3	1	0.0369112
Cellular components	GO:0045177	apical part of cell	2	1	0.0391332
Cellular components	GO:0005793	endoplasmic reticulum-Golgi intermediate compartment	5	1	0.0435628
Cellular components	GO:0030864	cortical actin cytoskeleton	7	1	0.0437838
Cellular components	GO:0005902	microvillus	5	1	0.0442256
Cellular components	GO:0005775	vacuolar lumen	5	1	0.0466521
Cellular components	GO:0030175	filopodium	5	1	0.0479732
Cellular components	GO:0045335	phagocytic vesicle	8	1	0.0479732

## Sheet: Table S7
Table S7. GO analysis of common expressed parent proteins in bovine colostrum.
Category	GO.ID	GO.Name	Level	FDR	P.Value
Biological processes	GO:0045910	negative regulation of DNA recombination	8	0.000246143	1.49121e-08
Biological processes	GO:0006334	nucleosome assembly	7	0.000246143	3.4344e-08
Biological processes	GO:0000018	regulation of DNA recombination	7	0.000246143	7.35515e-08
Biological processes	GO:0006325	chromatin organization	4	0.000269493	9.57263e-08
Biological processes	GO:0034728	nucleosome organization	6	0.000315244	1.25974e-07
Biological processes	GO:0006338	chromatin remodeling	5	0.00055144	3.18299e-07
Biological processes	GO:0065004	protein-DNA complex assembly	6	0.000588445	3.66391e-07
Biological processes	GO:1900242	regulation of synaptic vesicle endocytosis	7	0.000654122	4.69246e-07
Biological processes	GO:0016043	cellular component organization	3	0.000654122	4.93743e-07
Biological processes	GO:0051052	regulation of DNA metabolic process	6	0.000713949	5.87616e-07
Biological processes	GO:0071840	cellular component organization or biogenesis	2	0.000713949	6.02301e-07
Biological processes	GO:0030261	chromosome condensation	6	0.000721296	6.46428e-07
Biological processes	GO:0043933	protein-containing complex organization	4	0.00080102	8.24979e-07
Biological processes	GO:0071824	protein-DNA complex subunit organization	5	0.000856083	9.50275e-07
Biological processes	GO:0051276	chromosome organization	5	0.00104861	1.22682e-06
Biological processes	GO:0022607	cellular component assembly	4	0.00104861	1.29443e-06
Biological processes	GO:1903421	regulation of synaptic vesicle recycling	5	0.00104861	1.30367e-06
Biological processes	GO:0065003	protein-containing complex assembly	5	0.00151759	1.9541e-06
Biological processes	GO:0051053	negative regulation of DNA metabolic process	7	0.001971	2.62543e-06
Biological processes	GO:0060255	regulation of macromolecule metabolic process	4	0.00368905	5.07773e-06
Biological processes	GO:0080090	regulation of primary metabolic process	4	0.00431232	6.31856e-06
Biological processes	GO:0150111	regulation of transepithelial transport	5	0.00652406	1.01386e-05
Biological processes	GO:0019219	regulation of nucleobase-containing compound metabolic process	5	0.00660092	1.05512e-05
Biological processes	GO:0051171	regulation of nitrogen compound metabolic process	4	0.00931289	1.65401e-05
Biological processes	GO:0001738	morphogenesis of a polarized epithelium	5	0.014054	2.55845e-05
Biological processes	GO:0019222	regulation of metabolic process	3	0.0157029	2.99807e-05
Biological processes	GO:0031323	regulation of cellular metabolic process	4	0.0215047	4.20126e-05
Biological processes	GO:0010604	positive regulation of macromolecule metabolic process	5	0.0417688	8.53105e-05
Biological processes	GO:0110053	regulation of actin filament organization	8	0.0419266	8.74946e-05
Biological processes	GO:0032880	regulation of protein localization	4	0.0486141	0.000104035
Biological processes	GO:0007015	actin filament organization	5	0.0521538	0.000115784
Biological processes	GO:1902414	protein localization to cell junction	4	0.0741798	0.00017127
Biological processes	GO:0097435	supramolecular fiber organization	4	0.0912028	0.000234871
Biological processes	GO:0009893	positive regulation of metabolic process	4	0.0947671	0.000248258
Biological processes	GO:0032956	regulation of actin cytoskeleton organization	7	0.102506	0.000277634
Biological processes	GO:0030837	negative regulation of actin filament polymerization	11	0.104122	0.000286634
Biological processes	GO:0150105	protein localization to cell-cell junction	5	0.107433	0.000300518
Biological processes	GO:1902903	regulation of supramolecular fiber organization	5	0.123134	0.000349905
Biological processes	GO:0048523	negative regulation of cellular process	4	0.129257	0.000373044
Biological processes	GO:0006996	organelle organization	4	0.131446	0.000390934
Biological processes	GO:0032272	negative regulation of protein polymerization	7	0.131446	0.000393237
Biological processes	GO:0042989	sequestering of actin monomers	12	0.131446	0.00039687
Biological processes	GO:0032970	regulation of actin filament-based process	4	0.133204	0.000408093
Biological processes	GO:0032502	developmental process	1	0.212194	0.000686908
Biological processes	GO:0048024	regulation of mRNA splicing, via spliceosome	9	0.22512	0.000739672
Biological processes	GO:0060627	regulation of vesicle-mediated transport	5	0.226635	0.000756247
Biological processes	GO:0009653	anatomical structure morphogenesis	2	0.226635	0.000764776
Biological processes	GO:0031324	negative regulation of cellular metabolic process	5	0.277695	0.000961735
Biological processes	GO:1901389	negative regulation of transforming growth factor beta activation	9	0.291764	0.00107523
Biological processes	GO:0072749	cellular response to cytochalasin B	6	0.291764	0.00107523
Biological processes	GO:0046745	viral capsid secondary envelopment	2	0.291764	0.00107523
Biological processes	GO:1901328	response to cytochalasin B	5	0.291764	0.00107523
Biological processes	GO:0018205	peptidyl-lysine modification	8	0.302655	0.00114225
Biological processes	GO:0048869	cellular developmental process	2	0.306052	0.00117674
Biological processes	GO:0018023	peptidyl-lysine trimethylation	10	0.306052	0.00119583
Biological processes	GO:0010556	regulation of macromolecule biosynthetic process	5	0.310248	0.00123385
Biological processes	GO:0032879	regulation of localization	3	0.310248	0.00123978
Biological processes	GO:0050684	regulation of mRNA processing	8	0.337416	0.00136746
Biological processes	GO:0002686	negative regulation of leukocyte migration	8	0.337416	0.00137831
Biological processes	GO:0032435	negative regulation of proteasomal ubiquitin-dependent protein catabolic process	11	0.337765	0.0014054
Biological processes	GO:0010557	positive regulation of macromolecule biosynthetic process	6	0.337765	0.00141193
Biological processes	GO:0051173	positive regulation of nitrogen compound metabolic process	5	0.337765	0.00145721
Biological processes	GO:0048519	negative regulation of biological process	3	0.347217	0.00152626
Biological processes	GO:0051128	regulation of cellular component organization	4	0.347426	0.00154261
Biological processes	GO:0031333	negative regulation of protein-containing complex assembly	6	0.34754	0.00155854
Biological processes	GO:0051493	regulation of cytoskeleton organization	6	0.353255	0.00161696
Biological processes	GO:0030041	actin filament polymerization	7	0.353255	0.00163123
Biological processes	GO:0031326	regulation of cellular biosynthetic process	5	0.380582	0.00177432
Biological processes	GO:0030334	regulation of cell migration	6	0.38461	0.00181017
Biological processes	GO:0030100	regulation of endocytosis	6	0.409655	0.00200135
Biological processes	GO:0031328	positive regulation of cellular biosynthetic process	6	0.409655	0.00208388
Biological processes	GO:0030833	regulation of actin filament polymerization	10	0.409655	0.00210087
Biological processes	GO:0090303	positive regulation of wound healing	7	0.409655	0.00213114
Biological processes	GO:0099526	presynapse to nucleus signaling pathway	6	0.409655	0.00214934
Biological processes	GO:0051621	regulation of norepinephrine uptake	5	0.409655	0.00214934
Biological processes	GO:0098928	presynaptic signal transduction	5	0.409655	0.00214934
Biological processes	GO:2000805	negative regulation of termination of RNA polymerase II transcription, poly(A)-coupled	13	0.409655	0.00214934
Biological processes	GO:0120191	negative regulation of termination of RNA polymerase II transcription	12	0.409655	0.00214934
Biological processes	GO:0060567	negative regulation of DNA-templated transcription, termination	11	0.409655	0.00214934
Biological processes	GO:1901799	negative regulation of proteasomal protein catabolic process	10	0.409655	0.0021645
Biological processes	GO:2000059	negative regulation of ubiquitin-dependent protein catabolic process	10	0.431396	0.00233502
Biological processes	GO:2000145	regulation of cell motility	5	0.431396	0.00235097
Biological processes	GO:0009891	positive regulation of biosynthetic process	5	0.431396	0.00235599
Biological processes	GO:0051172	negative regulation of nitrogen compound metabolic process	5	0.436806	0.00240493
Biological processes	GO:0045935	positive regulation of nucleobase-containing compound metabolic process	6	0.450086	0.00255253
Biological processes	GO:1902904	negative regulation of supramolecular fiber organization	6	0.450086	0.00255804
Biological processes	GO:0043484	regulation of RNA splicing	7	0.450086	0.00261554
Biological processes	GO:0031325	positive regulation of cellular metabolic process	5	0.450086	0.00261612
Biological processes	GO:0060341	regulation of cellular localization	4	0.450086	0.00264562
Biological processes	GO:0035441	cell migration involved in vasculogenesis	5	0.450086	0.00268597
Biological processes	GO:0045944	positive regulation of transcription by RNA polymerase II	11	0.450086	0.00271415
Biological processes	GO:0008064	regulation of actin polymerization or depolymerization	9	0.450086	0.00276277
Biological processes	GO:0006397	mRNA processing	8	0.450086	0.00277107
Biological processes	GO:0045934	negative regulation of nucleobase-containing compound metabolic process	6	0.450086	0.00278649
Biological processes	GO:1903829	positive regulation of protein localization	5	0.450086	0.00278933
Biological processes	GO:0051494	negative regulation of cytoskeleton organization	7	0.450086	0.00280792
Biological processes	GO:0040012	regulation of locomotion	3	0.450086	0.00281778
Biological processes	GO:0051129	negative regulation of cellular component organization	5	0.453503	0.00288176
Biological processes	GO:0030832	regulation of actin filament length	8	0.453503	0.00289958
Biological processes	GO:1903036	positive regulation of response to wounding	6	0.453838	0.00292188
Biological processes	GO:0051270	regulation of cellular component movement	4	0.471254	0.00312387
Biological processes	GO:0032024	positive regulation of insulin secretion	10	0.471254	0.00319818
Biological processes	GO:0061857	endoplasmic reticulum stress-induced pre-emptive quality control	5	0.471254	0.00322232
Biological processes	GO:1904594	regulation of termination of RNA polymerase II transcription	9	0.471254	0.00322232
Biological processes	GO:1903526	negative regulation of membrane tubulation	7	0.471254	0.00322232
Biological processes	GO:2000804	regulation of termination of RNA polymerase II transcription, poly(A)-coupled	10	0.471254	0.00322232
Biological processes	GO:0097198	histone H3-K36 trimethylation	12	0.471254	0.00322232
Biological processes	GO:0009889	regulation of biosynthetic process	4	0.474561	0.003266
Biological processes	GO:1903051	negative regulation of proteolysis involved in cellular protein catabolic process	9	0.497271	0.00344438
Biological processes	GO:0000398	mRNA splicing, via spliceosome	11	0.516136	0.00375372
Biological processes	GO:0000377	RNA splicing, via transesterification reactions with bulged adenosine as nucleophile	10	0.516136	0.00375372
Biological processes	GO:1904692	positive regulation of type B pancreatic cell proliferation	7	0.516136	0.00375838
Biological processes	GO:1902396	protein localization to bicellular tight junction	6	0.516136	0.00375838
Biological processes	GO:0036506	maintenance of unfolded protein	4	0.516136	0.00375838
Biological processes	GO:1903392	negative regulation of adherens junction organization	6	0.516136	0.00375838
Biological processes	GO:1904378	maintenance of unfolded protein involved in ERAD pathway	5	0.516136	0.00375838
Biological processes	GO:0009892	negative regulation of metabolic process	4	0.521002	0.00384453
Biological processes	GO:0000375	RNA splicing, via transesterification reactions	9	0.521002	0.00386322
Biological processes	GO:1903363	negative regulation of cellular protein catabolic process	8	0.525248	0.00391802
Biological processes	GO:0010468	regulation of gene expression	5	0.539144	0.00404562
Biological processes	GO:0030029	actin filament-based process	2	0.577252	0.00438283
Biological processes	GO:0048812	neuron projection morphogenesis	8	0.616461	0.00478879
Biological processes	GO:0071896	protein localization to adherens junction	6	0.616461	0.00482967
Biological processes	GO:0030917	midbrain-hindbrain boundary development	3	0.616461	0.00482967
Biological processes	GO:0031554	regulation of DNA-templated transcription, termination	8	0.616461	0.00482967
Biological processes	GO:0050794	regulation of cellular process	3	0.616461	0.00484475
Biological processes	GO:0032271	regulation of protein polymerization	6	0.616679	0.00489444
Biological processes	GO:0030048	actin filament-based movement	3	0.616679	0.00490123
Biological processes	GO:0010033	response to organic substance	3	0.622812	0.00497763
Biological processes	GO:0034968	histone lysine methylation	10	0.624947	0.00505005
Biological processes	GO:0034097	response to cytokine	4	0.624947	0.00505019
Biological processes	GO:0120039	plasma membrane bounded cell projection morphogenesis	7	0.639696	0.00519778
Biological processes	GO:0060669	embryonic placenta morphogenesis	4	0.649614	0.0053649
Biological processes	GO:0071623	negative regulation of granulocyte chemotaxis	10	0.649614	0.0053649
Biological processes	GO:0090024	negative regulation of neutrophil chemotaxis	11	0.649614	0.0053649
Biological processes	GO:0048858	cell projection morphogenesis	6	0.650205	0.00539864
Biological processes	GO:0000381	regulation of alternative mRNA splicing, via spliceosome	10	0.666195	0.00556099
Biological processes	GO:0032507	maintenance of protein location in cell	4	0.668182	0.00561334
Biological processes	GO:0051258	protein polymerization	6	0.668182	0.00571872
Biological processes	GO:0090277	positive regulation of peptide hormone secretion	9	0.668182	0.00587849
Biological processes	GO:1902623	negative regulation of neutrophil migration	9	0.668182	0.00589984
Biological processes	GO:0010793	regulation of mRNA export from nucleus	8	0.668182	0.00589984
Biological processes	GO:0140213	negative regulation of long-chain fatty acid import into cell	8	0.668182	0.00589984
Biological processes	GO:1905323	telomerase holoenzyme complex assembly	7	0.668182	0.00589984
Biological processes	GO:0010748	negative regulation of long-chain fatty acid import across plasma membrane	9	0.668182	0.00589984
Biological processes	GO:0097676	histone H3-K36 dimethylation	12	0.668182	0.00589984
Biological processes	GO:0002793	positive regulation of peptide secretion	7	0.680198	0.00604029
Biological processes	GO:1904071	presynaptic active zone assembly	5	0.713881	0.0064345
Biological processes	GO:0048332	mesoderm morphogenesis	4	0.713881	0.0064345
Biological processes	GO:0030335	positive regulation of cell migration	7	0.715981	0.00648585
Biological processes	GO:0032990	cell part morphogenesis	5	0.715981	0.0065488
Biological processes	GO:0032989	cellular component morphogenesis	4	0.715981	0.0065488
Biological processes	GO:0010569	regulation of double-strand break repair via homologous recombination	9	0.726302	0.0067077
Biological processes	GO:0008154	actin polymerization or depolymerization	6	0.726302	0.0067077
Biological processes	GO:0098532	histone H3-K27 trimethylation	12	0.740345	0.00696888
Biological processes	GO:1902037	negative regulation of hematopoietic stem cell differentiation	7	0.740345	0.00696888
Biological processes	GO:0003006	developmental process involved in reproduction	2	0.742754	0.00702453
Biological processes	GO:0010605	negative regulation of macromolecule metabolic process	5	0.769234	0.00730912
Biological processes	GO:2000147	positive regulation of cell motility	6	0.771608	0.00749091
Biological processes	GO:2000197	regulation of ribonucleoprotein complex localization	5	0.771608	0.00750298
Biological processes	GO:0018022	peptidyl-lysine methylation	9	0.798492	0.00782969
Biological processes	GO:0051272	positive regulation of cellular component movement	5	0.798492	0.00783531
Biological processes	GO:0009838	abscission	2	0.808057	0.0080368
Biological processes	GO:0001915	negative regulation of T cell mediated cytotoxicity	9	0.808057	0.0080368
Biological processes	GO:0040017	positive regulation of locomotion	4	0.816016	0.00815219
Biological processes	GO:1903311	regulation of mRNA metabolic process	7	0.844757	0.00850018
Biological processes	GO:0010746	regulation of long-chain fatty acid import across plasma membrane	8	0.844757	0.00857034
Biological processes	GO:0031987	locomotion involved in locomotory behavior	2	0.844757	0.00857034
Biological processes	GO:0051049	regulation of transport	4	0.861422	0.00879705
Biological processes	GO:0070734	histone H3-K27 methylation	11	0.872473	0.0091036
Biological processes	GO:0061743	motor learning	7	0.872473	0.0091036
Biological processes	GO:0010452	histone H3-K36 methylation	11	0.872473	0.0091036
Biological processes	GO:0048522	positive regulation of cellular process	4	0.888214	0.00934672
Biological processes	GO:2000192	negative regulation of fatty acid transport	7	0.90056	0.00963658
Biological processes	GO:1903391	regulation of adherens junction organization	5	0.90056	0.00963658
Biological processes	GO:2000601	positive regulation of Arp2/3 complex-mediated actin nucleation	11	0.90056	0.00963658
Biological processes	GO:0032535	regulation of cellular component size	4	0.900796	0.00973475
Biological processes	GO:0046887	positive regulation of hormone secretion	8	0.900796	0.00976056
Biological processes	GO:0048589	developmental growth	2	0.900796	0.00979908
Biological processes	GO:0040007	growth	1	0.900796	0.00979908
Biological processes	GO:0048588	developmental cell growth	3	0.903804	0.00989609
Biological processes	GO:0016071	mRNA metabolic process	7	0.903804	0.00994951
Biological processes	GO:0016049	cell growth	2	0.903804	0.0100325
Biological processes	GO:0016571	histone methylation	9	0.903804	0.0100325
Biological processes	GO:0045185	maintenance of protein location	3	0.929953	0.0104466
Biological processes	GO:0051252	regulation of RNA metabolic process	6	0.930593	0.010615
Biological processes	GO:0043242	negative regulation of protein-containing complex disassembly	6	0.930593	0.0106565
Biological processes	GO:0044650	adhesion of symbiont to host cell	4	0.930593	0.0107017
Biological processes	GO:0019062	virion attachment to host cell	5	0.930593	0.0107017
Biological processes	GO:0045792	negative regulation of cell size	6	0.930593	0.0107017
Biological processes	GO:0061041	regulation of wound healing	6	0.941438	0.0108682
Biological processes	GO:0032231	regulation of actin filament bundle assembly	9	0.943958	0.0109392
Biological processes	GO:0140212	regulation of long-chain fatty acid import into cell	7	0.962009	0.0112338
Biological processes	GO:0050714	positive regulation of protein secretion	8	0.977812	0.0115874
Biological processes	GO:0048518	positive regulation of biological process	3	0.977812	0.0117637
Biological processes	GO:0060039	pericardium development	5	0.977812	0.0117657
Biological processes	GO:0042756	drinking behavior	4	0.977812	0.0117657
Biological processes	GO:1905634	regulation of protein localization to chromatin	5	0.977812	0.0117657
Biological processes	GO:0044406	adhesion of symbiont to host	3	0.977812	0.0117657
Biological processes	GO:0045893	positive regulation of transcription, DNA-templated	10	0.988554	0.0119912
Biological processes	GO:1903508	positive regulation of nucleic acid-templated transcription	9	0.988554	0.0119912
Biological processes	GO:0008380	RNA splicing	8	0.988554	0.0120266
Biological processes	GO:1902680	positive regulation of RNA biosynthetic process	8	0.997424	0.0122217
Biological processes	GO:0032000	positive regulation of fatty acid beta-oxidation	9	0.999853	0.0122973
Biological processes	GO:0051651	maintenance of location in cell	3	1	0.0124775
Biological processes	GO:0050789	regulation of biological process	2	1	0.0127
Biological processes	GO:2000643	positive regulation of early endosome to late endosome transport	8	1	0.0128286
Biological processes	GO:0034340	response to type I interferon	5	1	0.0128286
Biological processes	GO:1903525	regulation of membrane tubulation	6	1	0.0128286
Biological processes	GO:0006357	regulation of transcription by RNA polymerase II	10	1	0.0129455
Biological processes	GO:0042177	negative regulation of protein catabolic process	7	1	0.013087
Biological processes	GO:0048729	tissue morphogenesis	3	1	0.0132603
Biological processes	GO:0006620	post-translational protein targeting to endoplasmic reticulum membrane	9	1	0.0133596
Biological processes	GO:0048468	cell development	3	1	0.0136885
Biological processes	GO:0001913	T cell mediated cytotoxicity	6	1	0.0138903
Biological processes	GO:1901388	regulation of transforming growth factor beta activation	8	1	0.0138903
Biological processes	GO:0060977	coronary vasculature morphogenesis	5	1	0.0138903
Biological processes	GO:0007043	cell-cell junction assembly	6	1	0.0139459
Biological processes	GO:0060560	developmental growth involved in morphogenesis	3	1	0.0140252
Biological processes	GO:1990709	presynaptic active zone organization	4	1	0.0144208
Biological processes	GO:0034333	adherens junction assembly	7	1	0.0144208
Biological processes	GO:0048672	positive regulation of collateral sprouting	10	1	0.0144208
Biological processes	GO:0045176	apical protein localization	4	1	0.0144208
Biological processes	GO:0001946	lymphangiogenesis	3	1	0.014951
Biological processes	GO:0034111	negative regulation of homotypic cell-cell adhesion	7	1	0.014951
Biological processes	GO:0097091	synaptic vesicle clustering	6	1	0.014951
Biological processes	GO:0061469	regulation of type B pancreatic cell proliferation	6	1	0.0154809
Biological processes	GO:0006355	regulation of transcription, DNA-templated	9	1	0.0156572
Biological processes	GO:1903506	regulation of nucleic acid-templated transcription	8	1	0.0156962
Biological processes	GO:2001141	regulation of RNA biosynthetic process	7	1	0.015828
Biological processes	GO:0009987	cellular process	1	1	0.0159733
Biological processes	GO:0046321	positive regulation of fatty acid oxidation	8	1	0.0160105
Biological processes	GO:0046831	regulation of RNA export from nucleus	7	1	0.0160105
Biological processes	GO:0033327	Leydig cell differentiation	4	1	0.0160105
Biological processes	GO:0007409	axonogenesis	9	1	0.0160706
Biological processes	GO:0050796	regulation of insulin secretion	9	1	0.0160706
Biological processes	GO:1903034	regulation of response to wounding	5	1	0.0161549
Biological processes	GO:0018393	internal peptidyl-lysine acetylation	10	1	0.0162394
Biological processes	GO:0006475	internal protein amino acid acetylation	9	1	0.016409
Biological processes	GO:0032434	regulation of proteasomal ubiquitin-dependent protein catabolic process	10	1	0.0164941
Biological processes	GO:0071712	ER-associated misfolded protein catabolic process	9	1	0.0165399
Biological processes	GO:0018394	peptidyl-lysine acetylation	9	1	0.0167506
Biological processes	GO:0010639	negative regulation of organelle organization	6	1	0.0168937
Biological processes	GO:0071635	negative regulation of transforming growth factor beta production	8	1	0.017069
Biological processes	GO:0042221	response to chemical	2	1	0.0171828
Biological processes	GO:0042176	regulation of protein catabolic process	6	1	0.0172044
Biological processes	GO:0051254	positive regulation of RNA metabolic process	7	1	0.0174603
Biological processes	GO:0002683	negative regulation of immune system process	4	1	0.0175634
Biological processes	GO:0044342	type B pancreatic cell proliferation	4	1	0.0175978
Biological processes	GO:0002903	negative regulation of B cell apoptotic process	10	1	0.0175978
Biological processes	GO:2000779	regulation of double-strand break repair	8	1	0.0176176
Biological processes	GO:1902965	regulation of protein localization to early endosome	6	1	0.0181263
Biological processes	GO:1902966	positive regulation of protein localization to early endosome	7	1	0.0181263
Biological processes	GO:2000402	negative regulation of lymphocyte migration	10	1	0.0181263
Biological processes	GO:1903651	positive regulation of cytoplasmic transport	7	1	0.0186545
Biological processes	GO:0032239	regulation of nucleobase-containing compound transport	5	1	0.0186545
Biological processes	GO:0045725	positive regulation of glycogen biosynthetic process	10	1	0.0191825
Biological processes	GO:0001911	negative regulation of leukocyte mediated cytotoxicity	7	1	0.0191825
Biological processes	GO:1902036	regulation of hematopoietic stem cell differentiation	6	1	0.0191825
Biological processes	GO:2000010	positive regulation of protein localization to cell surface	6	1	0.0191825
Biological processes	GO:1901533	negative regulation of hematopoietic progenitor cell differentiation	6	1	0.0191825
Biological processes	GO:0032516	positive regulation of phosphoprotein phosphatase activity	10	1	0.0197102
Biological processes	GO:0070875	positive regulation of glycogen metabolic process	9	1	0.0197102
Biological processes	GO:0008213	protein alkylation	7	1	0.0197747
Biological processes	GO:0006479	protein methylation	8	1	0.0197747
Biological processes	GO:0030154	cell differentiation	3	1	0.0197757
Biological processes	GO:0048668	collateral sprouting	4	1	0.0202376
Biological processes	GO:0016570	histone modification	7	1	0.0203899
Biological processes	GO:0030575	nuclear body organization	6	1	0.0207647
Biological processes	GO:0044403	biological process involved in symbiotic interaction	2	1	0.0212713
Biological processes	GO:1905668	positive regulation of protein localization to endosome	6	1	0.0212916
Biological processes	GO:0032891	negative regulation of organic acid transport	6	1	0.0212916
Biological processes	GO:0030238	male sex determination	4	1	0.0212916
Biological processes	GO:0010586	miRNA metabolic process	8	1	0.0212916
Biological processes	GO:0002689	negative regulation of leukocyte chemotaxis	9	1	0.0218181
Biological processes	GO:0043244	regulation of protein-containing complex disassembly	5	1	0.0226185
Biological processes	GO:0090276	regulation of peptide hormone secretion	8	1	0.0228138
Biological processes	GO:1905666	regulation of protein localization to endosome	5	1	0.0228705
Biological processes	GO:1990403	embryonic brain development	5	1	0.0228705
Biological processes	GO:0030520	intracellular estrogen receptor signaling pathway	8	1	0.0228705
Biological processes	GO:2000058	regulation of ubiquitin-dependent protein catabolic process	9	1	0.0231081
Biological processes	GO:0008104	protein localization	3	1	0.0233877
Biological processes	GO:0031342	negative regulation of cell killing	5	1	0.0233962
Biological processes	GO:0006473	protein acetylation	8	1	0.0234039
Biological processes	GO:0002791	regulation of peptide secretion	6	1	0.0235028
Biological processes	GO:1904294	positive regulation of ERAD pathway	11	1	0.0239217
Biological processes	GO:0090066	regulation of anatomical structure size	3	1	0.0239876
Biological processes	GO:0030521	androgen receptor signaling pathway	8	1	0.0244469
Biological processes	GO:0002710	negative regulation of T cell mediated immunity	8	1	0.0244469
Biological processes	GO:0033036	macromolecule localization	2	1	0.0244621
Biological processes	GO:0007163	establishment or maintenance of cell polarity	2	1	0.024502
Biological processes	GO:0090087	regulation of peptide transport	5	1	0.0249065
Biological processes	GO:0048513	animal organ development	3	1	0.0250281
Biological processes	GO:0043254	regulation of protein-containing complex assembly	5	1	0.0250749
Biological processes	GO:0080182	histone H3-K4 trimethylation	12	1	0.0254964
Biological processes	GO:2001014	regulation of skeletal muscle cell differentiation	5	1	0.0254964
Biological processes	GO:0002902	regulation of B cell apoptotic process	9	1	0.0254964
Biological processes	GO:0071676	negative regulation of mononuclear cell migration	9	1	0.0254964
Biological processes	GO:0033173	calcineurin-NFAT signaling cascade	9	1	0.0260208
Biological processes	GO:0007130	synaptonemal complex assembly	7	1	0.0260208
Biological processes	GO:0043066	negative regulation of apoptotic process	7	1	0.0268717
Biological processes	GO:0051127	positive regulation of actin nucleation	10	1	0.0270687
Biological processes	GO:0031998	regulation of fatty acid beta-oxidation	8	1	0.0270687
Biological processes	GO:0060997	dendritic spine morphogenesis	9	1	0.0275923
Biological processes	GO:0071816	tail-anchored membrane protein insertion into ER membrane	9	1	0.0275923
Biological processes	GO:0051235	maintenance of location	2	1	0.028347
Biological processes	GO:0051131	chaperone-mediated protein complex assembly	6	1	0.0286385
Biological processes	GO:0045216	cell-cell junction organization	5	1	0.0287764
Biological processes	GO:0010817	regulation of hormone levels	3	1	0.0289696
Biological processes	GO:0043069	negative regulation of programmed cell death	6	1	0.0290637
Biological processes	GO:0071353	cellular response to interleukin-4	6	1	0.0291613
Biological processes	GO:0048670	regulation of collateral sprouting	9	1	0.0291613
Biological processes	GO:0007420	brain development	4	1	0.0292084
Biological processes	GO:2000641	regulation of early endosome to late endosome transport	7	1	0.0296837
Biological processes	GO:0030901	midbrain development	3	1	0.0296837
Biological processes	GO:0061136	regulation of proteasomal protein catabolic process	9	1	0.0298613
Biological processes	GO:1903729	regulation of plasma membrane organization	5	1	0.0302059
Biological processes	GO:0007530	sex determination	3	1	0.0302059
Biological processes	GO:0035774	positive regulation of insulin secretion involved in cellular response to glucose stimulus	11	1	0.0307278
Biological processes	GO:0065007	biological regulation	1	1	0.0312425
Biological processes	GO:0070670	response to interleukin-4	5	1	0.0317707
Biological processes	GO:0009896	positive regulation of catabolic process	5	1	0.0320905
Biological processes	GO:0070193	synaptonemal complex organization	6	1	0.0322918
Biological processes	GO:0033043	regulation of organelle organization	5	1	0.0326459
Biological processes	GO:0002053	positive regulation of mesenchymal cell proliferation	6	1	0.0328126
Biological processes	GO:1903530	regulation of secretion by cell	6	1	0.0331048
Biological processes	GO:0030879	mammary gland development	5	1	0.0333331
Biological processes	GO:0019076	viral release from host cell	7	1	0.0333331
Biological processes	GO:0035891	exit from host cell	6	1	0.0333331
Biological processes	GO:0035890	exit from host	5	1	0.0333331
Biological processes	GO:0080134	regulation of response to stress	4	1	0.0337412
Biological processes	GO:0018027	peptidyl-lysine dimethylation	10	1	0.0343734
Biological processes	GO:0000380	alternative mRNA splicing, via spliceosome	12	1	0.0343734
Biological processes	GO:1904292	regulation of ERAD pathway	10	1	0.0348931
Biological processes	GO:0032727	positive regulation of interferon-alpha production	9	1	0.0348931
Biological processes	GO:0002456	T cell mediated immunity	5	1	0.0354125
Biological processes	GO:0050996	positive regulation of lipid catabolic process	7	1	0.0354125
Biological processes	GO:0050821	protein stabilization	4	1	0.0355249
Biological processes	GO:0006282	regulation of DNA repair	7	1	0.0356421
Biological processes	GO:0046883	regulation of hormone secretion	7	1	0.0357595
Biological processes	GO:0097720	calcineurin-mediated signaling	8	1	0.0359317
Biological processes	GO:0005979	regulation of glycogen biosynthetic process	9	1	0.0364506
Biological processes	GO:0071542	dopaminergic neuron differentiation	5	1	0.0364506
Biological processes	GO:0010962	regulation of glucan biosynthetic process	8	1	0.0364506
Biological processes	GO:0048016	inositol phosphate-mediated signaling	7	1	0.0364506
Biological processes	GO:0043543	protein acylation	7	1	0.036467
Biological processes	GO:2000191	regulation of fatty acid transport	6	1	0.0369692
Biological processes	GO:1900027	regulation of ruffle assembly	8	1	0.0374875
Biological processes	GO:0010922	positive regulation of phosphatase activity	9	1	0.0380056
Biological processes	GO:0007004	telomere maintenance via telomerase	9	1	0.0380056
Biological processes	GO:0021549	cerebellum development	3	1	0.0380056
Biological processes	GO:0018193	peptidyl-amino acid modification	7	1	0.0381332
Biological processes	GO:0060548	negative regulation of cell death	5	1	0.0382827
Biological processes	GO:0030511	positive regulation of transforming growth factor beta receptor signaling pathway	8	1	0.0385234
Biological processes	GO:1903846	positive regulation of cellular response to transforming growth factor beta stimulus	6	1	0.0385234
Biological processes	GO:0045048	protein insertion into ER membrane	8	1	0.0385234
Biological processes	GO:1903050	regulation of proteolysis involved in cellular protein catabolic process	8	1	0.038622
Biological processes	GO:0045732	positive regulation of protein catabolic process	7	1	0.0388645
Biological processes	GO:0002685	regulation of leukocyte migration	7	1	0.0389859
Biological processes	GO:0042771	intrinsic apoptotic signaling pathway in response to DNA damage by p53 class mediator	8	1	0.0390409
Biological processes	GO:0097061	dendritic spine organization	7	1	0.0390409
Biological processes	GO:0032369	negative regulation of lipid transport	6	1	0.0395582
Biological processes	GO:0006278	RNA-templated DNA biosynthetic process	8	1	0.0395582
Biological processes	GO:0048741	skeletal muscle fiber development	6	1	0.0395582
Biological processes	GO:0032647	regulation of interferon-alpha production	8	1	0.0395582
Biological processes	GO:1904031	positive regulation of cyclin-dependent protein kinase activity	11	1	0.0400751
Biological processes	GO:0000245	spliceosomal complex assembly	7	1	0.0400751
Biological processes	GO:0034315	regulation of Arp2/3 complex-mediated actin nucleation	10	1	0.0400751
Biological processes	GO:0009954	proximal/distal pattern formation	4	1	0.0400751
Biological processes	GO:0010464	regulation of mesenchymal cell proliferation	5	1	0.0400751
Biological processes	GO:0035115	embryonic forelimb morphogenesis	6	1	0.0400751
Biological processes	GO:0048701	embryonic cranial skeleton morphogenesis	6	1	0.0405919
Biological processes	GO:0006396	RNA processing	7	1	0.0408757
Biological processes	GO:0050708	regulation of protein secretion	7	1	0.0410725
Biological processes	GO:0043473	pigmentation	1	1	0.0411083
Biological processes	GO:0043968	histone H2A acetylation	12	1	0.0411083
Biological processes	GO:0022414	reproductive process	1	1	0.0413844
Biological processes	GO:0034260	negative regulation of GTPase activity	6	1	0.0416245
Biological processes	GO:0043029	T cell homeostasis	7	1	0.0416245
Biological processes	GO:2000737	negative regulation of stem cell differentiation	6	1	0.0416245
Biological processes	GO:0061028	establishment of endothelial barrier	6	1	0.0421404
Biological processes	GO:0034110	regulation of homotypic cell-cell adhesion	6	1	0.0421404
Biological processes	GO:1903649	regulation of cytoplasmic transport	6	1	0.0431713
Biological processes	GO:0046326	positive regulation of glucose import	8	1	0.0436864
Biological processes	GO:0070873	regulation of glycogen metabolic process	8	1	0.0436864
Biological processes	GO:1903362	regulation of cellular protein catabolic process	7	1	0.0438344
Biological processes	GO:1903532	positive regulation of secretion by cell	7	1	0.0440888
Biological processes	GO:0051046	regulation of secretion	5	1	0.0441617
Biological processes	GO:0099173	postsynapse organization	4	1	0.0442012
Biological processes	GO:0030900	forebrain development	3	1	0.0447158
Biological processes	GO:0035987	endodermal cell differentiation	4	1	0.0447158
Biological processes	GO:0014904	myotube cell development	5	1	0.0447158
Biological processes	GO:0001525	angiogenesis	3	1	0.0449839
Biological processes	GO:0071634	regulation of transforming growth factor beta production	7	1	0.04523
Biological processes	GO:0045047	protein targeting to ER	8	1	0.04523
Biological processes	GO:0048864	stem cell development	4	1	0.04523
Biological processes	GO:0022402	cell cycle process	2	1	0.0455827
Biological processes	GO:2000008	regulation of protein localization to cell surface	5	1	0.045744
Biological processes	GO:1901532	regulation of hematopoietic progenitor cell differentiation	5	1	0.045744
Biological processes	GO:0006298	mismatch repair	8	1	0.0462578
Biological processes	GO:0010833	telomere maintenance via telomere lengthening	8	1	0.0462578
Biological processes	GO:0001890	placenta development	4	1	0.0467712
Biological processes	GO:0032885	regulation of polysaccharide biosynthetic process	7	1	0.0467712
Biological processes	GO:0090022	regulation of neutrophil chemotaxis	10	1	0.0467712
Biological processes	GO:0009894	regulation of catabolic process	4	1	0.0469176
Biological processes	GO:0034329	cell junction assembly	5	1	0.0471856
Biological processes	GO:0046320	regulation of fatty acid oxidation	7	1	0.0472844
Biological processes	GO:0051973	positive regulation of telomerase activity	9	1	0.0472844
Biological processes	GO:0001885	endothelial cell development	5	1	0.0472844
Biological processes	GO:1902624	positive regulation of neutrophil migration	9	1	0.04831
Biological processes	GO:0022618	ribonucleoprotein complex assembly	6	1	0.048499
Biological processes	GO:0035136	forelimb morphogenesis	5	1	0.0488224
Biological processes	GO:0010907	positive regulation of glucose metabolic process	8	1	0.0488224
Biological processes	GO:0031330	negative regulation of cellular catabolic process	6	1	0.0490281
Biological processes	GO:0071385	cellular response to glucocorticoid stimulus	8	1	0.0493345
Biological processes	GO:0070229	negative regulation of lymphocyte apoptotic process	9	1	0.0493345
Biological processes	GO:1905898	positive regulation of response to endoplasmic reticulum stress	7	1	0.0498463
Molecular functions	GO:0031491	nucleosome binding	3	0.000246143	3.56357e-08
Molecular functions	GO:0031492	nucleosomal DNA binding	6	0.000246143	7.6503e-08
Molecular functions	GO:0008092	cytoskeletal protein binding	3	0.000365153	1.78345e-07
Molecular functions	GO:0003779	actin binding	4	0.000381567	2.03303e-07
Molecular functions	GO:0030527	structural constituent of chromatin	2	0.000588445	3.91913e-07
Molecular functions	GO:0005198	structural molecule activity	1	0.000721296	6.72552e-07
Molecular functions	GO:0031490	chromatin DNA binding	5	0.00080102	8.53587e-07
Molecular functions	GO:0098918	structural constituent of synapse	2	0.00414402	5.88796e-06
Molecular functions	GO:0098973	structural constituent of postsynaptic actin cytoskeleton	4	0.00652406	1.01386e-05
Molecular functions	GO:0003785	actin monomer binding	5	0.00903976	1.48509e-05
Molecular functions	GO:0044877	protein-containing complex binding	2	0.00931289	1.62659e-05
Molecular functions	GO:0005522	profilin binding	3	0.0651313	0.000147487
Molecular functions	GO:0005515	protein binding	2	0.0883934	0.000211937
Molecular functions	GO:0099186	structural constituent of postsynapse	3	0.0912028	0.000228427
Molecular functions	GO:0005488	binding	1	0.102506	0.000273146
Molecular functions	GO:0003676	nucleic acid binding	3	0.297011	0.00110776
Molecular functions	GO:0036002	pre-mRNA binding	5	0.337765	0.00146034
Molecular functions	GO:0045131	pre-mRNA branch point binding	6	0.353255	0.00161243
Molecular functions	GO:0003682	chromatin binding	2	0.450086	0.00255152
Molecular functions	GO:0090541	MIT domain binding	4	0.450086	0.00268597
Molecular functions	GO:0019899	enzyme binding	3	0.453503	0.00287073
Molecular functions	GO:0003690	double-stranded DNA binding	5	0.519973	0.00380941
Molecular functions	GO:0003677	DNA binding	4	0.688416	0.00614384
Molecular functions	GO:1990269	RNA polymerase II C-terminal domain phosphoserine binding	8	0.740345	0.00696888
Molecular functions	GO:0030346	protein phosphatase 2B binding	6	0.740345	0.00696888
Molecular functions	GO:0043008	ATP-dependent protein binding	3	0.771608	0.00750298
Molecular functions	GO:0140311	protein sequestering activity	2	0.872473	0.0091036
Molecular functions	GO:0005200	structural constituent of cytoskeleton	2	0.886837	0.00929284
Molecular functions	GO:0030957	Tat protein binding	6	0.90056	0.00963658
Molecular functions	GO:0031625	ubiquitin protein ligase binding	5	0.903804	0.0100262
Molecular functions	GO:0098882	structural constituent of presynaptic active zone	3	0.930593	0.0107017
Molecular functions	GO:0044389	ubiquitin-like protein ligase binding	4	1	0.0126534
Molecular functions	GO:0050815	phosphoserine residue binding	5	1	0.0133596
Molecular functions	GO:0033192	calmodulin-dependent protein phosphatase activity	9	1	0.0138903
Molecular functions	GO:0099122	RNA polymerase II C-terminal domain binding	7	1	0.0144208
Molecular functions	GO:0004723	calcium-dependent protein serine/threonine phosphatase activity	8	1	0.014951
Molecular functions	GO:0140313	molecular sequestering activity	1	1	0.0154809
Molecular functions	GO:0031072	heat shock protein binding	3	1	0.0165794
Molecular functions	GO:0050998	nitric-oxide synthase binding	4	1	0.017069
Molecular functions	GO:1990226	histone methyltransferase binding	4	1	0.0191825
Molecular functions	GO:0046975	histone methyltransferase activity (H3-K36 specific)	9	1	0.0202376
Molecular functions	GO:0005068	transmembrane receptor protein tyrosine kinase adaptor activity	8	1	0.0228705
Molecular functions	GO:0097157	pre-mRNA intronic binding	6	1	0.0244469
Molecular functions	GO:0070628	proteasome binding	3	1	0.0244469
Molecular functions	GO:1990381	ubiquitin-specific protease binding	5	1	0.0249718
Molecular functions	GO:0005158	insulin receptor binding	4	1	0.0270687
Molecular functions	GO:0046935	1-phosphatidylinositol-3-kinase regulator activity	5	1	0.0275923
Molecular functions	GO:0071933	Arp2/3 complex binding	3	1	0.0275923
Molecular functions	GO:0003723	RNA binding	4	1	0.0289364
Molecular functions	GO:0070577	lysine-acetylated histone binding	5	1	0.0312494
Molecular functions	GO:0035014	phosphatidylinositol 3-kinase regulator activity	4	1	0.0312494
Molecular functions	GO:0140033	acetylation-dependent protein binding	4	1	0.0312494
Molecular functions	GO:0070182	DNA polymerase binding	4	1	0.0338534
Molecular functions	GO:0140030	modification-dependent protein binding	3	1	0.0343609
Molecular functions	GO:1901363	heterocyclic compound binding	2	1	0.0348965
Molecular functions	GO:0048156	tau protein binding	4	1	0.0385234
Molecular functions	GO:0051787	misfolded protein binding	3	1	0.0442012
Molecular functions	GO:0034237	protein kinase A regulatory subunit binding	4	1	0.0442012
Molecular functions	GO:0097718	disordered domain specific binding	4	1	0.04523
Cellular components	GO:0044815	DNA packaging complex	2	0.000246143	5.43862e-08
Cellular components	GO:0000786	nucleosome	3	0.000246143	5.76994e-08
Cellular components	GO:0005884	actin filament	6	0.000365153	1.75964e-07
Cellular components	GO:0032993	protein-DNA complex	2	0.00080102	7.99997e-07
Cellular components	GO:0043296	apical junction complex	5	0.00910912	1.53693e-05
Cellular components	GO:0097433	dense body	2	0.0157029	2.95105e-05
Cellular components	GO:0005856	cytoskeleton	5	0.0315518	6.30419e-05
Cellular components	GO:0044305	calyx of Held	4	0.0486141	0.000105767
Cellular components	GO:0043229	intracellular organelle	3	0.0826848	0.000194578
Cellular components	GO:0043226	organelle	2	0.0884323	0.000215957
Cellular components	GO:0005634	nucleus	5	0.0912028	0.000231478
Cellular components	GO:0030863	cortical cytoskeleton	6	0.142549	0.000443053
Cellular components	GO:0043232	intracellular non-membrane-bounded organelle	4	0.212194	0.000685434
Cellular components	GO:0043228	non-membrane-bounded organelle	3	0.212194	0.000687779
Cellular components	GO:0099513	polymeric cytoskeletal fiber	5	0.242023	0.000827448
Cellular components	GO:0120220	basal body patch	2	0.291764	0.00107523
Cellular components	GO:0098978	glutamatergic synapse	4	0.306052	0.00118711
Cellular components	GO:0099512	supramolecular fiber	4	0.337765	0.00146972
Cellular components	GO:0099081	supramolecular polymer	3	0.337765	0.00146972
Cellular components	GO:0099080	supramolecular complex	2	0.409655	0.00203432
Cellular components	GO:1990565	HSP90-CDC37 chaperone complex	3	0.409655	0.00214934
Cellular components	GO:0005912	adherens junction	5	0.431396	0.00233592
Cellular components	GO:0030027	lamellipodium	4	0.450086	0.00264458
Cellular components	GO:0043679	axon terminus	3	0.450086	0.00269449
Cellular components	GO:0032991	protein-containing complex	1	0.456336	0.00295822
Cellular components	GO:0000785	chromatin	2	0.471254	0.00308996
Cellular components	GO:0098871	postsynaptic actin cytoskeleton	7	0.516136	0.00375838
Cellular components	GO:0044306	neuron projection terminus	2	0.554893	0.00418843
Cellular components	GO:0071818	BAT3 complex	3	0.616461	0.00482967
Cellular components	GO:0098685	Schaffer collateral - CA1 synapse	4	0.668182	0.00577175
Cellular components	GO:0005911	cell-cell junction	4	0.668182	0.00590393
Cellular components	GO:0072379	ER membrane insertion complex	2	0.771608	0.00750298
Cellular components	GO:0044294	dendritic growth cone	4	0.771608	0.00750298
Cellular components	GO:0005925	focal adhesion	5	0.806347	0.00794818
Cellular components	GO:0030055	cell-substrate junction	4	0.844757	0.00858936
Cellular components	GO:0045202	synapse	3	0.872473	0.00896968
Cellular components	GO:0089701	U2AF complex	3	0.908859	0.0101693
Cellular components	GO:0099571	postsynaptic cytoskeleton	6	0.908859	0.0101693
Cellular components	GO:0030478	actin cap	2	0.962009	0.0112338
Cellular components	GO:1990904	ribonucleoprotein complex	2	0.977812	0.0116221
Cellular components	GO:0030054	cell junction	2	0.977812	0.0116464
Cellular components	GO:0005955	calcineurin complex	6	1	0.0128286
Cellular components	GO:0031209	SCAR complex	2	1	0.0144208
Cellular components	GO:0044292	dendrite terminus	2	1	0.014951
Cellular components	GO:0034751	aryl hydrocarbon receptor complex	3	1	0.0154809
Cellular components	GO:0048788	cytoskeleton of presynaptic active zone	7	1	0.017069
Cellular components	GO:0043231	intracellular membrane-bounded organelle	4	1	0.0200032
Cellular components	GO:0099569	presynaptic cytoskeleton	6	1	0.0202376
Cellular components	GO:0098858	actin-based cell projection	4	1	0.0209872
Cellular components	GO:0005635	nuclear envelope	4	1	0.0216527
Cellular components	GO:0043227	membrane-bounded organelle	3	1	0.0225246
Cellular components	GO:0031975	envelope	2	1	0.0238008
Cellular components	GO:0031967	organelle envelope	3	1	0.0238008
Cellular components	GO:0016604	nuclear body	2	1	0.0241731
Cellular components	GO:0120293	dynein axonemal particle	5	1	0.0254964
Cellular components	GO:0120025	plasma membrane bounded cell projection	3	1	0.0305692
Cellular components	GO:0044295	axonal growth cone	4	1	0.0322918
Cellular components	GO:0090543	Flemming body	2	1	0.0348931
Cellular components	GO:0032420	stereocilium	5	1	0.0390409
Cellular components	GO:0031941	filamentous actin	2	1	0.0411083
Cellular components	GO:0042995	cell projection	2	1	0.0429213
Cellular components	GO:0005689	U12-type spliceosomal complex	4	1	0.0447158
Cellular components	GO:0005686	U2 snRNP	5	1	0.0462578
Cellular components	GO:0070161	anchoring junction	3	1	0.0473111
Cellular components	GO:0098793	presynapse	2	1	0.0477093
Cellular components	GO:0005681	spliceosomal complex	3	1	0.0478406

## Sheet: Table S8
Table S8. GO analysis of common expressed parent proteins in donkey colostrum.
Category	GO.ID	GO.Name	Level	FDR	P.Value
Biological processes	GO:0065004	protein-DNA complex assembly	6	0.000422712	3.57065e-08
Biological processes	GO:0006325	chromatin organization	4	0.000422712	5.90915e-08
Biological processes	GO:0071824	protein-DNA complex subunit organization	5	0.000422712	9.38442e-08
Biological processes	GO:0006334	nucleosome assembly	7	0.00057511	1.85602e-07
Biological processes	GO:0065003	protein-containing complex assembly	5	0.000758065	3.36589e-07
Biological processes	GO:0034728	nucleosome organization	6	0.00110531	5.50869e-07
Biological processes	GO:0006338	chromatin remodeling	5	0.00110531	5.88922e-07
Biological processes	GO:0043933	protein-containing complex organization	4	0.00170914	9.86539e-07
Biological processes	GO:1903526	negative regulation of membrane tubulation	7	0.00299532	1.99493e-06
Biological processes	GO:0006657	CDP-choline pathway	9	0.0122768	1.03569e-05
Biological processes	GO:0030261	chromosome condensation	6	0.0155936	1.38474e-05
Biological processes	GO:0022607	cellular component assembly	4	0.0176666	1.74523e-05
Biological processes	GO:0045910	negative regulation of DNA recombination	8	0.0194878	2.07667e-05
Biological processes	GO:0016043	cellular component organization	3	0.0218771	2.42841e-05
Biological processes	GO:0071840	cellular component organization or biogenesis	2	0.0224583	2.79208e-05
Biological processes	GO:1903525	regulation of membrane tubulation	6	0.0274429	3.65548e-05
Biological processes	GO:2000402	negative regulation of lymphocyte migration	10	0.0521741	7.41306e-05
Biological processes	GO:0006646	phosphatidylethanolamine biosynthetic process	8	0.0614778	9.2809e-05
Biological processes	GO:0071676	negative regulation of mononuclear cell migration	9	0.0956054	0.000148574
Biological processes	GO:0006656	phosphatidylcholine biosynthetic process	8	0.100896	0.000161276
Biological processes	GO:0060997	dendritic spine morphogenesis	9	0.106214	0.000174493
Biological processes	GO:1903729	regulation of plasma membrane organization	5	0.124334	0.000209782
Biological processes	GO:0097061	dendritic spine organization	7	0.189634	0.000353638
Biological processes	GO:0000018	regulation of DNA recombination	7	0.222156	0.00042857
Biological processes	GO:0046337	phosphatidylethanolamine metabolic process	7	0.222156	0.000434014
Biological processes	GO:0051053	negative regulation of DNA metabolic process	7	0.222952	0.000454235
Biological processes	GO:0099173	postsynapse organization	4	0.222952	0.000455368
Biological processes	GO:0106027	neuron projection organization	6	0.302022	0.000644231
Biological processes	GO:0002686	negative regulation of leukocyte migration	8	0.302022	0.000657094
Biological processes	GO:0030041	actin filament polymerization	7	0.336786	0.000778442
Biological processes	GO:0048812	neuron projection morphogenesis	8	0.639726	0.00164746
Biological processes	GO:0120039	plasma membrane bounded cell projection morphogenesis	7	0.684181	0.00179232
Biological processes	GO:0048858	cell projection morphogenesis	6	0.691683	0.00186363
Biological processes	GO:0051653	spindle localization	4	0.691683	0.00188253
Biological processes	GO:0009636	response to toxic substance	3	0.691683	0.00190411
Biological processes	GO:2000401	regulation of lymphocyte migration	9	0.743938	0.00208099
Biological processes	GO:0046470	phosphatidylcholine metabolic process	7	0.764429	0.00217225
Biological processes	GO:0032990	cell part morphogenesis	5	0.775969	0.00227395
Biological processes	GO:0032989	cellular component morphogenesis	4	0.775969	0.00227395
Biological processes	GO:0030048	actin filament-based movement	3	0.793438	0.00236037
Biological processes	GO:0030324	lung development	4	0.830119	0.00250635
Biological processes	GO:1903392	negative regulation of adherens junction organization	6	0.847471	0.00259637
Biological processes	GO:0051258	protein polymerization	6	0.887658	0.0027589
Biological processes	GO:0099175	regulation of postsynapse organization	6	0.924974	0.00291596
Biological processes	GO:0008154	actin polymerization or depolymerization	6	1	0.0032424
Biological processes	GO:0007015	actin filament organization	5	1	0.00436182
Biological processes	GO:0051129	negative regulation of cellular component organization	5	1	0.00443698
Biological processes	GO:0071675	regulation of mononuclear cell migration	8	1	0.00597709
Biological processes	GO:0051276	chromosome organization	5	1	0.00647238
Biological processes	GO:1903391	regulation of adherens junction organization	5	1	0.00666324
Biological processes	GO:0045792	negative regulation of cell size	6	1	0.00740095
Biological processes	GO:2000643	positive regulation of early endosome to late endosome transport	8	1	0.00887478
Biological processes	GO:0034111	negative regulation of homotypic cell-cell adhesion	7	1	0.0103465
Biological processes	GO:0016558	protein import into peroxisome matrix	9	1	0.0110816
Biological processes	GO:0030334	regulation of cell migration	6	1	0.0119353
Biological processes	GO:1902965	regulation of protein localization to early endosome	6	1	0.0125501
Biological processes	GO:1902966	positive regulation of protein localization to early endosome	7	1	0.0125501
Biological processes	GO:1903651	positive regulation of cytoplasmic transport	7	1	0.0129169
Biological processes	GO:0031503	protein-containing complex localization	2	1	0.0129661
Biological processes	GO:0051052	regulation of DNA metabolic process	6	1	0.0138214
Biological processes	GO:2000145	regulation of cell motility	5	1	0.0142236
Biological processes	GO:0007420	brain development	4	1	0.0145354
Biological processes	GO:1905668	positive regulation of protein localization to endosome	6	1	0.014749
Biological processes	GO:0010586	miRNA metabolic process	8	1	0.014749
Biological processes	GO:0046474	glycerophospholipid biosynthetic process	7	1	0.015321
Biological processes	GO:1905666	regulation of protein localization to endosome	5	1	0.0158467
Biological processes	GO:0030520	intracellular estrogen receptor signaling pathway	8	1	0.0158467
Biological processes	GO:0040012	regulation of locomotion	3	1	0.0160625
Biological processes	GO:0006625	protein targeting to peroxisome	8	1	0.0162123
Biological processes	GO:0072663	establishment of protein localization to peroxisome	7	1	0.0162123
Biological processes	GO:0072662	protein localization to peroxisome	6	1	0.0162123
Biological processes	GO:0030521	androgen receptor signaling pathway	8	1	0.0169431
Biological processes	GO:0050807	regulation of synapse organization	5	1	0.0169462
Biological processes	GO:0051270	regulation of cellular component movement	4	1	0.0172143
Biological processes	GO:2001014	regulation of skeletal muscle cell differentiation	5	1	0.0176735
Biological processes	GO:0000398	mRNA splicing, via spliceosome	11	1	0.0195155
Biological processes	GO:0000377	RNA splicing, via transesterification reactions with bulged adenosine as nucleophile	10	1	0.0195155
Biological processes	GO:0002685	regulation of leukocyte migration	7	1	0.0195786
Biological processes	GO:0045017	glycerolipid biosynthetic process	6	1	0.0196418
Biological processes	GO:0015919	peroxisomal membrane transport	6	1	0.0198613
Biological processes	GO:0042989	sequestering of actin monomers	12	1	0.0198613
Biological processes	GO:0000375	RNA splicing, via transesterification reactions	9	1	0.0198952
Biological processes	GO:2000641	regulation of early endosome to late endosome transport	7	1	0.0205896
Biological processes	GO:0043574	peroxisomal transport	5	1	0.021681
Biological processes	GO:0008654	phospholipid biosynthetic process	6	1	0.0218402
Biological processes	GO:0097435	supramolecular fiber organization	4	1	0.022565
Biological processes	GO:0000380	alternative mRNA splicing, via spliceosome	12	1	0.0238602
Biological processes	GO:0031175	neuron projection development	6	1	0.0245515
Biological processes	GO:1900027	regulation of ruffle assembly	8	1	0.0260348
Biological processes	GO:0007031	peroxisome organization	5	1	0.0260348
Biological processes	GO:0030336	negative regulation of cell migration	7	1	0.0266712
Biological processes	GO:0000245	spliceosomal complex assembly	7	1	0.0278433
Biological processes	GO:0034260	negative regulation of GTPase activity	6	1	0.0289269
Biological processes	GO:2000146	negative regulation of cell motility	6	1	0.0290115
Biological processes	GO:0061028	establishment of endothelial barrier	6	1	0.0292878
Biological processes	GO:0034110	regulation of homotypic cell-cell adhesion	6	1	0.0292878
Biological processes	GO:0051271	negative regulation of cellular component movement	5	1	0.0299098
Biological processes	GO:1903649	regulation of cytoplasmic transport	6	1	0.0300093
Biological processes	GO:0001885	endothelial cell development	5	1	0.0328901
Biological processes	GO:0032535	regulation of cellular component size	4	1	0.0369932
Biological processes	GO:0040013	negative regulation of locomotion	4	1	0.0370753
Biological processes	GO:0110053	regulation of actin filament organization	8	1	0.0388146
Biological processes	GO:0032880	regulation of protein localization	4	1	0.0399739
Biological processes	GO:0044743	protein transmembrane import into intracellular organelle	7	1	0.0400558
Biological processes	GO:0045934	negative regulation of nucleobase-containing compound metabolic process	6	1	0.0420463
Biological processes	GO:0045893	positive regulation of transcription, DNA-templated	10	1	0.042556
Biological processes	GO:1903508	positive regulation of nucleic acid-templated transcription	9	1	0.042556
Biological processes	GO:0008380	RNA splicing	8	1	0.0426452
Biological processes	GO:0006650	glycerophospholipid metabolic process	6	1	0.0428187
Biological processes	GO:1902680	positive regulation of RNA biosynthetic process	8	1	0.043106
Biological processes	GO:0030518	intracellular steroid hormone receptor signaling pathway	7	1	0.0453965
Biological processes	GO:0009653	anatomical structure morphogenesis	2	1	0.0483982
Biological processes	GO:0043401	steroid hormone mediated signaling pathway	6	1	0.0485871
Molecular functions	GO:0030527	structural constituent of chromatin	2	0.000422712	5.67905e-08
Molecular functions	GO:0005198	structural molecule activity	1	0.00057511	2.04284e-07
Molecular functions	GO:0046982	protein heterodimerization activity	4	0.0017718	1.10138e-06
Molecular functions	GO:0008520	L-ascorbate:sodium symporter activity	10	0.00372632	2.79226e-06
Molecular functions	GO:0031492	nucleosomal DNA binding	6	0.00372632	2.8127e-06
Molecular functions	GO:0004103	choline kinase activity	5	0.00748141	5.97928e-06
Molecular functions	GO:0004305	ethanolamine kinase activity	5	0.0170767	1.59227e-05
Molecular functions	GO:0015229	L-ascorbic acid transmembrane transporter activity	6	0.0176666	1.80416e-05
Molecular functions	GO:0033300	dehydroascorbic acid transmembrane transporter activity	6	0.0224583	2.78327e-05
Molecular functions	GO:0031491	nucleosome binding	3	0.0270974	3.48914e-05
Molecular functions	GO:0046983	protein dimerization activity	3	0.0518138	7.13181e-05
Molecular functions	GO:0031490	chromatin DNA binding	5	0.130905	0.000232163
Molecular functions	GO:0005402	carbohydrate:cation symporter activity	7	0.130905	0.000232492
Molecular functions	GO:0003677	DNA binding	4	0.148905	0.000271073
Molecular functions	GO:0090482	vitamin transmembrane transporter activity	3	0.336786	0.00075061
Molecular functions	GO:0003676	nucleic acid binding	3	0.336786	0.000766421
Molecular functions	GO:0015145	monosaccharide transmembrane transporter activity	5	0.336786	0.000792543
Molecular functions	GO:0051119	sugar transmembrane transporter activity	4	0.354588	0.000850179
Molecular functions	GO:0005343	organic acid:sodium symporter activity	9	0.391379	0.000955771
Molecular functions	GO:0015144	carbohydrate transmembrane transporter activity	3	0.57559	0.00145674
Molecular functions	GO:0003779	actin binding	4	0.98449	0.00314729
Molecular functions	GO:0098973	structural constituent of postsynaptic actin cytoskeleton	4	1	0.003337
Molecular functions	GO:0015370	solute:sodium symporter activity	8	1	0.00501371
Molecular functions	GO:1901363	heterocyclic compound binding	2	1	0.00961868
Molecular functions	GO:0015294	solute:cation symporter activity	6	1	0.00964884
Molecular functions	GO:0097159	organic cyclic compound binding	2	1	0.0103584
Molecular functions	GO:0015293	symporter activity	5	1	0.0150383
Molecular functions	GO:0099186	structural constituent of postsynapse	3	1	0.015115
Molecular functions	GO:0046943	carboxylic acid transmembrane transporter activity	4	1	0.0190765
Molecular functions	GO:0005342	organic acid transmembrane transporter activity	3	1	0.0194526
Molecular functions	GO:0015081	sodium ion transmembrane transporter activity	7	1	0.0200863
Molecular functions	GO:0008514	organic anion transmembrane transporter activity	5	1	0.0228413
Molecular functions	GO:0098918	structural constituent of synapse	2	1	0.0234973
Molecular functions	GO:0003682	chromatin binding	2	1	0.0275892
Molecular functions	GO:0003785	actin monomer binding	5	1	0.0318108
Molecular functions	GO:0070273	phosphatidylinositol-4-phosphate binding	6	1	0.0343273
Molecular functions	GO:0008092	cytoskeletal protein binding	3	1	0.0377219
Molecular functions	GO:0015291	secondary active transmembrane transporter activity	4	1	0.0428187
Molecular functions	GO:0140662	ATP-dependent protein folding chaperone	2	1	0.0453965
Cellular components	GO:0032993	protein-DNA complex	2	0.000422712	7.88012e-08
Cellular components	GO:0044815	DNA packaging complex	2	0.000478841	1.27566e-07
Cellular components	GO:0000786	nucleosome	3	0.00071691	2.86484e-07
Cellular components	GO:0030478	actin cap	2	0.0224583	2.78327e-05
Cellular components	GO:0005884	actin filament	6	0.0614778	9.04336e-05
Cellular components	GO:0009925	basal plasma membrane	4	0.290575	0.000606386
Cellular components	GO:0005634	nucleus	5	0.408495	0.00101571
Cellular components	GO:0043229	intracellular organelle	3	1	0.00343675
Cellular components	GO:0016324	apical plasma membrane	4	1	0.00486786
Cellular components	GO:0097433	dense body	2	1	0.00555568
Cellular components	GO:0043226	organelle	2	1	0.00741571
Cellular components	GO:0030027	lamellipodium	4	1	0.0154347
Cellular components	GO:0005689	U12-type spliceosomal complex	4	1	0.0310906
Cellular components	GO:0005686	U2 snRNP	5	1	0.0321707
Cellular components	GO:0005925	focal adhesion	5	1	0.0322814
Cellular components	GO:0030055	cell-substrate junction	4	1	0.0340085
Cellular components	GO:0035267	NuA4 histone acetyltransferase complex	9	1	0.0371957
Cellular components	GO:0043189	H4/H2A histone acetyltransferase complex	8	1	0.0371957
Cellular components	GO:0098978	glutamatergic synapse	4	1	0.0406699
Cellular components	GO:0099513	polymeric cytoskeletal fiber	5	1	0.0414447
Cellular components	GO:0043231	intracellular membrane-bounded organelle	4	1	0.0447063

## Sheet: Table S9
KEGG analysis of common expressed parent proteins in human colostrum.
Pathway.Description	tier1	tier2	P.Value
Neutrophil extracellular trap formation	Organismal Systems	Immune system	2.74206e-15
Systemic lupus erythematosus	Human Diseases	Immune disease	2.13567e-11
Alcoholism	Human Diseases	Substance dependence	1.9172e-10
Viral carcinogenesis	Human Diseases	Cancer: overview	5.74281e-10
Regulation of actin cytoskeleton	Cellular Processes	Cell motility	2.05956e-07
Tight junction	Cellular Processes	Cellular community - eukaryotes	7.78988e-06
Proteoglycans in cancer	Human Diseases	Cancer: overview	1.33171e-05
Vibrio cholerae infection	Human Diseases	Infectious disease: bacterial	5.86169e-05
Viral myocarditis	Human Diseases	Cardiovascular disease	8.22914e-05
Gastric acid secretion	Organismal Systems	Digestive system	0.000137828
Bacterial invasion of epithelial cells	Human Diseases	Infectious disease: bacterial	0.000145288
Arrhythmogenic right ventricular cardiomyopathy	Human Diseases	Cardiovascular disease	0.000145288
Hypertrophic cardiomyopathy	Human Diseases	Cardiovascular disease	0.000189791
Dilated cardiomyopathy	Human Diseases	Cardiovascular disease	0.000207427
Adherens junction	Cellular Processes	Cellular community - eukaryotes	0.000211957
Leukocyte transendothelial migration	Organismal Systems	Immune system	0.000318211
Thyroid hormone signaling pathway	Organismal Systems	Endocrine system	0.00035833
Platelet activation	Organismal Systems	Immune system	0.000364253
Yersinia infection	Human Diseases	Infectious disease: bacterial	0.00044558
Apoptosis	Cellular Processes	Cell growth and death	0.000452169
Fluid shear stress and atherosclerosis	Human Diseases	Cardiovascular disease	0.000465489
Phagosome	Cellular Processes	Transport and catabolism	0.000549384
Oxytocin signaling pathway	Organismal Systems	Endocrine system	0.000564028
Hippo signaling pathway	Environmental Information Processing	Signal transduction	0.000586347
Influenza A	Human Diseases	Infectious disease: viral	0.000679854
Hepatocellular carcinoma	Human Diseases	Cancer: specific types	0.000679854
Motor proteins	Cellular Processes	Cell motility	0.000896282
Pathogenic Escherichia coli infection	Human Diseases	Infectious disease: bacterial	0.000914852
Focal adhesion	Cellular Processes	Cellular community - eukaryotes	0.000990981
Rap1 signaling pathway	Environmental Information Processing	Signal transduction	0.00105002
Thermogenesis	Organismal Systems	Environmental adaptation	0.00129164
Shigellosis	Human Diseases	Infectious disease: bacterial	0.00131379
Salmonella infection	Human Diseases	Infectious disease: bacterial	0.00149756
Amyotrophic lateral sclerosis	Human Diseases	Neurodegenerative disease	0.00310396
MicroRNAs in cancer	Human Diseases	Cancer: overview	0.0362436

## Sheet: Table S10
KEGG analysis of common expressed parent proteins in bovine colostrum.
Pathway.Description	tier1	tier2	P.Value
Yersinia infection	Human Diseases	Infectious disease: bacterial	1.57918e-09
Regulation of actin cytoskeleton	Cellular Processes	Cell motility	1.71408e-08
Adherens junction	Cellular Processes	Cellular community - eukaryotes	2.99955e-08
Bacterial invasion of epithelial cells	Human Diseases	Infectious disease: bacterial	3.21644e-08
Salmonella infection	Human Diseases	Infectious disease: bacterial	2.55031e-06
Fluid shear stress and atherosclerosis	Human Diseases	Cardiovascular disease	2.25457e-05
Tight junction	Cellular Processes	Cellular community - eukaryotes	2.32272e-05
Oxytocin signaling pathway	Organismal Systems	Endocrine system	2.32272e-05
Neutrophil extracellular trap formation	Organismal Systems	Immune system	3.60399e-05
Proteoglycans in cancer	Human Diseases	Cancer: overview	6.01844e-05
Endocytosis	Cellular Processes	Transport and catabolism	8.47396e-05
Viral myocarditis	Human Diseases	Cardiovascular disease	0.000166089
Arrhythmogenic right ventricular cardiomyopathy	Human Diseases	Cardiovascular disease	0.000263257
Hypertrophic cardiomyopathy	Human Diseases	Cardiovascular disease	0.000426809
Amyotrophic lateral sclerosis	Human Diseases	Neurodegenerative disease	0.000452525
Gastric acid secretion	Organismal Systems	Digestive system	0.000489885
Dilated cardiomyopathy	Human Diseases	Cardiovascular disease	0.000523017
Th17 cell differentiation	Organismal Systems	Immune system	0.000704539
Thyroid hormone signaling pathway	Organismal Systems	Endocrine system	0.000847228
Leukocyte transendothelial migration	Organismal Systems	Immune system	0.000912292
Hippo signaling pathway	Environmental Information Processing	Signal transduction	0.00100268
Platelet activation	Organismal Systems	Immune system	0.00104942
Apoptosis	Cellular Processes	Cell growth and death	0.00119583
Motor proteins	Cellular Processes	Cell motility	0.00154464
Phagosome	Cellular Processes	Transport and catabolism	0.00157325
Hepatocellular carcinoma	Human Diseases	Cancer: specific types	0.0017502
Focal adhesion	Cellular Processes	Cellular community - eukaryotes	0.00203254
Influenza A	Human Diseases	Infectious disease: viral	0.00209803
Rap1 signaling pathway	Environmental Information Processing	Signal transduction	0.00247587
Lipid and atherosclerosis	Human Diseases	Cardiovascular disease	0.00307832
Thermogenesis	Organismal Systems	Environmental adaptation	0.00475449
VEGF signaling pathway	Environmental Information Processing	Signal transduction	0.0186545
Long-term potentiation	Organismal Systems	Nervous system	0.0212916
B cell receptor signaling pathway	Organismal Systems	Immune system	0.0228705
Antigen processing and presentation	Organismal Systems	Immune system	0.0239217
Amphetamine addiction	Human Diseases	Substance dependence	0.0254964
Renin secretion	Organismal Systems	Endocrine system	0.0296837
Th1 and Th2 cell differentiation	Organismal Systems	Immune system	0.0307278
PD-L1 expression and PD-1 checkpoint pathway in cancer	Human Diseases	Cancer: overview	0.0312494
Choline metabolism in cancer	Human Diseases	Cancer: overview	0.0317707
Fc gamma R-mediated phagocytosis	Organismal Systems	Immune system	0.0322918
Progesterone-mediated oocyte maturation	Organismal Systems	Endocrine system	0.0322918
Prostate cancer	Human Diseases	Cancer: specific types	0.0333331
IL-17 signaling pathway	Organismal Systems	Immune system	0.0338534
C-type lectin receptor signaling pathway	Organismal Systems	Immune system	0.0364506
T cell receptor signaling pathway	Organismal Systems	Immune system	0.0364506
Glucagon signaling pathway	Organismal Systems	Endocrine system	0.0400751
Glutamatergic synapse	Organismal Systems	Nervous system	0.0411083
Osteoclast differentiation	Organismal Systems	Development and regeneration	0.0421404
Systemic lupus erythematosus	Human Diseases	Immune disease	0.0421404
Natural killer cell mediated cytotoxicity	Organismal Systems	Immune system	0.0436864
Oocyte meiosis	Cellular Processes	Cell growth and death	0.0447158
Dopaminergic synapse	Organismal Systems	Nervous system	0.0467712

## Sheet: Table S11
KEGG analysis of common expressed parent proteins in donkey colostrum.
Pathway.Description	tier1	tier2	P.Value
Neutrophil extracellular trap formation	Organismal Systems	Immune system	1.48373e-10
Alcoholism	Human Diseases	Substance dependence	9.58594e-09
Viral carcinogenesis	Human Diseases	Cancer: overview	1.0868e-08
Systemic lupus erythematosus	Human Diseases	Immune disease	2.14435e-08
Arrhythmogenic right ventricular cardiomyopathy	Human Diseases	Cardiovascular disease	0.0125501
Bacterial invasion of epithelial cells	Human Diseases	Infectious disease: bacterial	0.0129169
Adherens junction	Cellular Processes	Cellular community - eukaryotes	0.0136501
Hippo signaling pathway	Environmental Information Processing	Signal transduction	0.0140166
Thyroid hormone signaling pathway	Organismal Systems	Endocrine system	0.0140166
Apoptosis	Cellular Processes	Cell growth and death	0.015115
Yersinia infection	Human Diseases	Infectious disease: bacterial	0.015115
Hypertrophic cardiomyopathy	Human Diseases	Cardiovascular disease	0.0154809
Dilated cardiomyopathy	Human Diseases	Cardiovascular disease	0.0180385
Gastric acid secretion	Organismal Systems	Digestive system	0.018768
Viral myocarditis	Human Diseases	Cardiovascular disease	0.019497
Hepatocellular carcinoma	Human Diseases	Cancer: specific types	0.0198613
Leukocyte transendothelial migration	Organismal Systems	Immune system	0.0205896
Oxytocin signaling pathway	Organismal Systems	Endocrine system	0.0205896
Fluid shear stress and atherosclerosis	Human Diseases	Cardiovascular disease	0.0213173
Tight junction	Cellular Processes	Cellular community - eukaryotes	0.021681
Platelet activation	Organismal Systems	Immune system	0.024223
Regulation of actin cytoskeleton	Cellular Processes	Cell motility	0.0249481
Rap1 signaling pathway	Environmental Information Processing	Signal transduction	0.0253104
Motor proteins	Cellular Processes	Cell motility	0.0274819
Spliceosome	Genetic Information Processing	Transcription	0.0325304
Proteoglycans in cancer	Human Diseases	Cancer: overview	0.0346863
Phagosome	Cellular Processes	Transport and catabolism	0.0357625
Endocytosis	Cellular Processes	Transport and catabolism	0.0357625
Salmonella infection	Human Diseases	Infectious disease: bacterial	0.036121
Focal adhesion	Cellular Processes	Cellular community - eukaryotes	0.0382692
Influenza A	Human Diseases	Infectious disease: viral	0.0386268

## Sheet: Table S12
Common endogenous peptides in HC, BC and DC
Peptide	HC-1	HC-2	HC-3	MASS	BC-1	BC-2	BC-3	MASS	DC-1	DC-2	DC-3	Mass
DSYVGDEAQSK	734	826	827	1197.51	1057.2	1178.1	183.79	1197.51	105	203	198	1197.51
DESGPSIVHR	133	149	170	1095.53	2057.2	2388.9	2139.1	1095.53	209	193	189	1095.53
DESGPSIVH	150	151	25.4	939.43	4757	5776	4803.3	939.43	3850	6770	6180	939.43
VAPEEHPVLLTEAPLNPK	151	66.8	145	1953.06	1352.1	1287.8	1768.9	1953.06	14.3	267	100	1953.06
GPPVSELITK	331	800	517	1039.59	415.14	430.04	423.98	1039.59	514	640	392	1039.59
SLVSKGTLVQTKGTGASGSFKLN	464	407	747	2279.25	484.91	20.195	653.08	2279.25	182	14.3	134	2279.25
DVEKNNSRIKL	280	326	474	1314.73	7231.3	7682.8	6904.5	1314.73	5210	5490	4670	1314.73
RFEELKKKT	1540	743	1250	1177.68	3923.7	3844.6	3902.2	1177.68	3580	3150	2760	1177.68
SKLKKTETQEKNPLPSKETIEQEKQAGES	29900	14200	21000	3284.71	417.04	20.195	509.14	3284.71	2670	1350	1280	3284.71
KTETQEKNPLPSKETIEQEKQAGES	6190	6840	6770	2828.4	20299	2326.3	25647	2828.4	543	450	741	2828.4
KNPLPSKETIEQEKQAGES	229	267	272	2112.07	5730.1	275.44	7841.5	2112.07	441	391	348	2112.07
NPLPSKETIEQEKQAGES	436	672	518	1983.97	431.13	20.195	550.76	1983.97	15200	17200	15700	1983.97
PEPAKSAPAPKKGSK	6600	7910	6930	1491.84	2313.4	2802.2	20.195	1491.84	471	381	14.3	1491.84
DDEEKPKI	456	341	405	972.476	16141	9687.1	16446	972.476	29100	28900	27300	972.476
PPPPPPPPPP	1400	10700	2660	988.538	70859	78822	61200	988.538	17800	14700	12700	988.538
APPPPPPPPP	53.1	405	175	962.523	5129.4	6197.7	7816.8	962.523	1110	1710	1430	962.523
PPPPPPPP	312	4900	4390	794.433	194850	198320	43393	794.433	2450	9710	7410	794.433
PPPPPPPPP	3030	2370	2460	891.485	222290	254600	200220	891.485	21300	29900	24500	891.485
APPPPPPPP	1190	1450	1050	865.47	68633	74949	63355	865.47	3160	5790	4410	865.47
